# Supplementary material for: Experimental and computational studies on the palladium-catalyzed intramolecular dearomatization, electrophilic addition, intermolecular coupling sequence
Source: Royal Society of Chemistry journal article supplement (doi:10.1039/d3qo02087h), 2023-12-28
Supplement: d3qo02087h1.pdf [file d3qo02087h1.pdf]

# Experimental and Computational Studies on the Palladium-catalyzed Intramolecular Dearomatization, Electrophilic Addition, Intermolecular Coupling Sequence

Qing-Hui Liu,<sup>†</sup> Yue Ma,<sup>†</sup> Hong-Yu Zhang,<sup>†</sup> Yuecheng Zhang,<sup>\*,†</sup> Jiquan Zhao,<sup>†</sup>  
Xiaohui Cao,<sup>\*,‡</sup> Ya-Ping Han,<sup>\*,†</sup> and Yong-Min Liang<sup>§</sup>

<sup>†</sup>School of Chemical Engineering and Technology, Hebei University of Technology, Tianjin 300130, China.

<sup>‡</sup>School of Pharmacy, Guangdong Pharmaceutical University, Guangzhou 510006, China

<sup>§</sup>State Key Laboratory of Applied Organic Chemistry, Lanzhou University, Lanzhou 730000, China

## Supporting Information

|                                                                                               |     |
|-----------------------------------------------------------------------------------------------|-----|
| 1. General methods and materials .....                                                        | 2   |
| 2. General Procedures .....                                                                   | 2   |
| 2.1 Synthesis of substrates 1 .....                                                           | 2   |
| 2.2 Synthesis of substrates 2 .....                                                           | 3   |
| 2.3 Synthesis of substrates 4 .....                                                           | 3   |
| 2.4 Synthesis of chiral phosphoramidite ligands L <sub>1</sub> -L <sub>6</sub> .....          | 4   |
| 3. Optimization of the reaction conditions.....                                               | 5   |
| 4. Procedure for the tandem cyclization of indoles with <i>N</i> -propargylated aniline. .... | 7   |
| 4.1 Synthesis of products 3 .....                                                             | 7   |
| 4.2 Synthesis of products 5 .....                                                             | 7   |
| 4.3 Synthesis of products 6 .....                                                             | 8   |
| 5. Mechanistic studies .....                                                                  | 8   |
| 5.1 H/D-exchange study.....                                                                   | 8   |
| 5.2 Intermolecular KIE competition .....                                                      | 9   |
| 6. Characterization data of 3a-8 .....                                                        | 11  |
| 7. NMR Charts .....                                                                           | 28  |
| 8. Computational details .....                                                                | 68  |
| 9. X-ray single crystal diffraction data of 3a .....                                          | 110 |

## 1. General methods and materials

All reactions involving air- and moisture-sensitive reagents were carried out under an argon atmosphere.  $^1\text{H}$  and  $^{13}\text{C}$  NMR spectra were recorded on a Bruker AC-P 400 spectrometer (400 MHz for  $^1\text{H}$ , 100 MHz for  $^{13}\text{C}$ ) in  $\text{CDCl}_3$  (with TMS as internal standard). Chemical shifts ( $\delta$ ) were measured in ppm. Coupling constants,  $J$ , are reported in hertz. Mass data were measured with Thermo Scientific DSQ II mass spectrometer and Bruker O-TOF Compact Mass Spectrometry. Melting points (uncorrected) were obtained on Shanghai Inesa WRS-3 melting point apparatus. The starting materials were purchased from Innochem or Energy Chemicals and used without further purification. Solvents were dried and purified according to the procedure from "Purification of Laboratory Chemicals book". The crude products were purified by flash column chromatography on silica gel and the reported yields are the actual isolated yields of pure products. Thin-layer chromatography (TLC) was performed using 60 mesh silica gel plates visualized with short-wavelength UV light (254 nm).

## 2. General Procedures

### 2.1 Synthesis of substrates 1

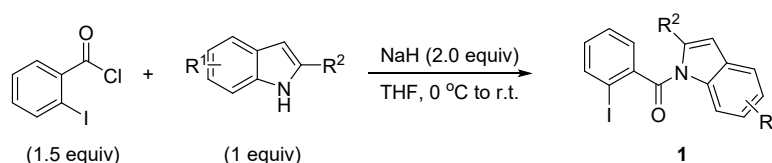

**Synthesis of substrates 1a-1i, 1o:** To a solution of indole derivative (1.0 equiv, 0.5 M) in THF was added 60% dispersion of NaH (1.2 equiv) in portions at 0 °C. After stirring at 0 °C for 30 min, a solution of acid chloride in THF was added dropwise to the reaction system. The mixture was then allowed to stir at room temperature. When the reaction was completed, the reaction mixture was quenched by aqueous  $\text{NH}_4\text{Cl}$  and extracted with EtOAc. The combined organic phase was dried over  $\text{Na}_2\text{SO}_4$  and concentrated under reduced pressure. The residue was purified by column chromatography using the indicated fluent to give the substrates.

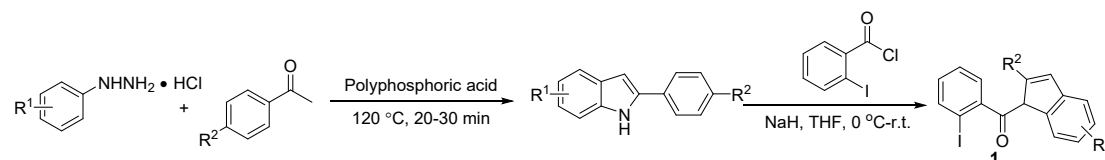

**Synthesis of substrates 1j-1n:** The appropriate substituted phenylhydrazine (1.0 mmol) and substituted acetophenone (1.0 mmol) were mixed in ethanol (20 mL) and a few drops of glacial AcOH were added. The solution was heated under reflux at 80 °C for 1-2 h. The solvents were evaporated in vacuo to give a solid that was added to polyphosphoric acid (PPA) (30 mL), and the mixture slowly heated to 120 °C and kept at this temperature for a few hours until the reaction was complete (TLC monitoring). The mixture was allowed to cool and then poured into cold water (50 mL). The acidic solution was neutralized by the slow addition of 1 M NaOH (aq) and the solid precipitate of crude

product was collected. Purification by column chromatography (hexane/ethyl acetate) gave the required indole products.

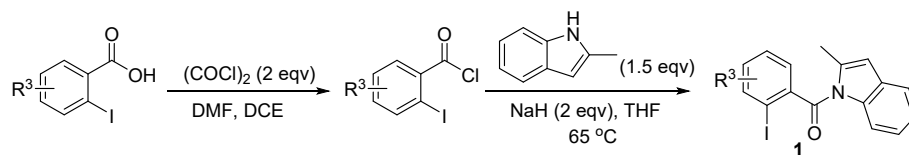

**Synthesis of substrates 1p, 1q, 1r:** In a flame dried flask under argon, oxalyl chloride (2.0 equiv) was added slowly to a solution of 2-iodo benzoic acid in DCM (0.5 M) with a few drops of DMF at 0 °C. The suspension was allowed to warm to room temperature and was stirred for 3 hours. The solvent was removed in-Vacuo, and the resulting yellow solid was put under argon. In a separate flame dried flask, to a solution of 2-methyl indole in THF (0.5 M) was added NaH (2.0 equiv) at 0 °C. The reaction was let stir until the gas evolution ceased. The yellow acyl chloride was suspended in THF and added *via* 3 aliquots dropwise at 0 °C. The reaction was allowed to warm to room temperature and was then heated to 65 °C overnight. Upon completion the reaction was quenched with H<sub>2</sub>O and extracted 3 x EtOAc. The product was purified *via* silica gel chromatography with a solvent gradient of 100:1 pentane: triethylamine to 50:1:1 pentane: triethylamine: EtOAc.

## 2.2 Synthesis of substrates 2

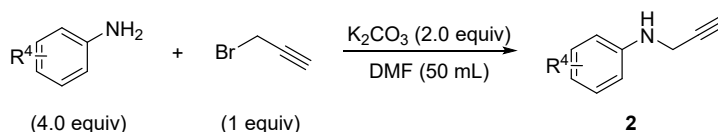

To a mixture of K<sub>2</sub>CO<sub>3</sub> (2.0 equiv) and *p*-toluidine (4.0 equiv) in DMF solvent was added 3-bromopropyne (1.0 equiv) dropwise at rt and stirred overnight. The reaction mixture was quenched with ice cold water and extracted with EtOAc (3x). The combined extracts were dried over anhydrous Na<sub>2</sub>SO<sub>4</sub>. The dried extracts were concentrated, and the crude product was purified by flash column chromatography on silica gel using 5% ethyl acetate in petroleum ether as eluent to afford the pure products.

## 2.3 Synthesis of substrates 4

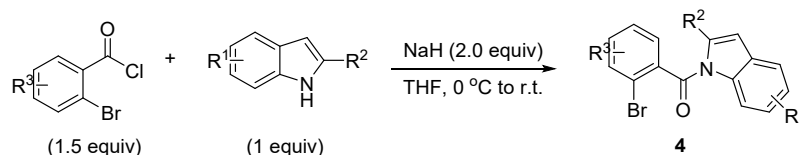

A 60% dispersion of NaH in mineral oil (2.0 equiv) was added to a stirred solution of the appropriate indole derivative (1 equiv, ~0.5 M) in THF at 0 °C and the corresponding solution was stirred for 5 minutes before warming to room temperature where it was stirred for 30 minutes. The solution of the sodium indolate was re-cooled to 0 °C at which time a solution of appropriate 2-bromobenzoyl chloride derivative (1.5 equiv, ~1 M) in THF was added dropwise. Once the addition was complete, the reaction was allowed to warm to room temperature and then was stirred at 65 °C for 30 minutes. At this time the extent of completion of the reaction was determined by conversion of the

indole derivate by TLC analysis. The reaction was cooled to room temperature and quenched with a saturated solution of  $\text{NH}_4\text{Cl}$ . The reaction mixture was then diluted with water and EtOAc, and after separating the layers, the aqueous layer was extracted with EtOAc (3x). The combined organic layers were washed sequentially with water and brine, dried over sodium sulfate, filtered and concentrated under reduced pressure. The crude *N*-(2-bromobenzoyl) indole derivative was purified by flash column gel chromatography using the indicated solvent system.

## 2.4 Synthesis of chiral phosphoramidite ligands $\text{L}_1\text{-L}_6$

The preparation of chiral phosphoramidite ligands  $\text{L}_1\text{-L}_6$  were prepared according to the known method. [1, 2]

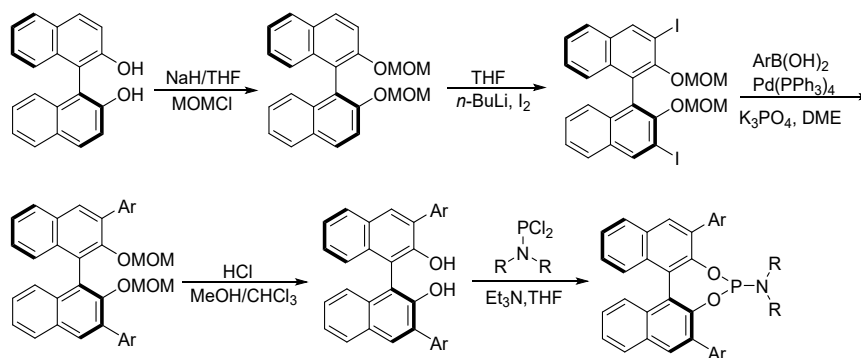

General Procedure a: To a solution of *N,N*-diisopropylamine (20.0 mmol) in dry THF (15 mL) at 0 °C was added *n*-BuLi (2.5 M in hexanes, 20 mmol) dropwise over 3 min under argon atmosphere. After stirring at 0 °C for 30 min,  $\text{PCl}_3$  (60.0 mmol) was added to the reaction mixture in one portion. The resulting mixture was warmed to room temperature, stirred for 1 h, and then concentrated at room temperature. The remaining  $\text{PCl}_3$  was removed under vacuum. dry THF (30 mL) was then added to the resulting residue. After stirring for 10 min, the mixture was cooled to 0 °C, followed by addition of a solution of 3,3'-disubstituted binaphthyl compound (10.0 mmol) and  $\text{Et}_3\text{N}$  (33.0 mmol) in dry THF (15 mL) over 2 min. The mixture was warmed to room temperature and stirred overnight. Then it was filtered and the solid was washed with THF. The residue was purified by chromatography on silica gel, eluting with PE:DCM = 10:1 (v/v) to afford the ligand  $\text{L}_1\text{-L}_6$ .

[1] *Org. Lett.* **2004**, 6, 2701-2704;

[2] *Angew. Chem. Int. Ed.* **2017**, 56, 7475-7478.

### 3. Optimization of the reaction conditions

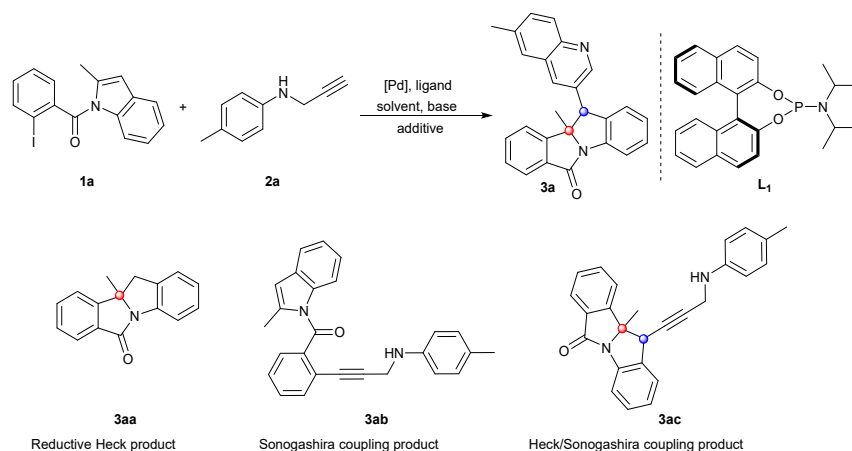

| entry                 | catalyst                                             | ligand               | base                               | solvent    | 3a               | 3aa              | 3ab              | 3ac              | Recovery of 1a(%) <sup>b</sup> |
|-----------------------|------------------------------------------------------|----------------------|------------------------------------|------------|------------------|------------------|------------------|------------------|--------------------------------|
|                       |                                                      |                      |                                    |            | (%) <sup>b</sup> | (%) <sup>b</sup> | (%) <sup>b</sup> | (%) <sup>b</sup> |                                |
| 1                     | Pd <sub>2</sub> (dba) <sub>3</sub>                   | PPh <sub>3</sub>     | Cs <sub>2</sub> CO <sub>3</sub>    | THF        | 24               | trace            | 11               | 23               | 39                             |
| 2                     | Pd <sub>2</sub> (dba) <sub>3</sub>                   | PPh <sub>3</sub>     | Cs <sub>2</sub> CO <sub>3</sub>    | MeCN       | NR               | 65               | 13               | trace            | 17                             |
| 3                     | Pd <sub>2</sub> (dba) <sub>3</sub>                   | PPh <sub>3</sub>     | Cs <sub>2</sub> CO <sub>3</sub>    | DCE        | 50               | trace            | 9                | 17               | 19                             |
| 4                     | Pd <sub>2</sub> (dba) <sub>3</sub>                   | PPh <sub>3</sub>     | Cs <sub>2</sub> CO <sub>3</sub>    | dioxane    | 36               | 11               | 14               | 18               | 18                             |
| 5                     | Pd <sub>2</sub> (dba) <sub>3</sub>                   | PPh <sub>3</sub>     | Cs <sub>2</sub> CO <sub>3</sub>    | PhMe       | 46               | 9                | 19               | 17               | 5                              |
| 6                     | Pd <sub>2</sub> (dba) <sub>3</sub>                   | PPh <sub>3</sub>     | <sup>t</sup> BuOLi                 | DCE        | 15               | 35               | 14               | 18               | 14                             |
| 7                     | Pd <sub>2</sub> (dba) <sub>3</sub>                   | PPh <sub>3</sub>     | NaHCO <sub>3</sub>                 | DCE        | 48               | 30               | 7                | 6                | 5                              |
| 8                     | Pd <sub>2</sub> (dba) <sub>3</sub>                   | PPh <sub>3</sub>     | KHCO <sub>3</sub>                  | DCE        | 47               | 4                | 41               | 4                | trace                          |
| 9                     | Pd <sub>2</sub> (dba) <sub>3</sub>                   | PPh <sub>3</sub>     | K <sub>2</sub> CO <sub>3</sub>     | DCE        | 55               | 25               | 6                | 5                | 4                              |
| 10                    | Pd <sub>2</sub> (dba) <sub>3</sub>                   | PPh <sub>3</sub>     | Na <sub>2</sub> CO <sub>3</sub>    | DCE        | 43               | 28               | 7                | 5                | 12                             |
| 11                    | Pd(PPh <sub>3</sub> ) <sub>2</sub> Cl <sub>2</sub>   | PPh <sub>3</sub>     | K <sub>2</sub> CO <sub>3</sub>     | DCE        | 48               | 6                | 15               | 27               | trace                          |
| 12                    | Pd(PPh <sub>2</sub> Me) <sub>2</sub> Cl <sub>2</sub> | PPh <sub>3</sub>     | K <sub>2</sub> CO <sub>3</sub>     | DCE        | 46               | 32               | 5                | 7                | 6                              |
| 13                    | Pd(OAc) <sub>2</sub>                                 | PPh <sub>3</sub>     | K <sub>2</sub> CO <sub>3</sub>     | DCE        | 20               | 17               | 26               | 35               | trace                          |
| 14                    | Pd(PPh <sub>3</sub> ) <sub>4</sub>                   | PPh <sub>3</sub>     | K <sub>2</sub> CO <sub>3</sub>     | DCE        | 59               | 15               | 8                | 10               | 4                              |
| 15                    | Pd(PPh <sub>3</sub> ) <sub>4</sub>                   | Xphos                | K <sub>2</sub> CO <sub>3</sub>     | DCE        | 45               | 20               | 20               | 13               | trace                          |
| 16                    | Pd(PPh <sub>3</sub> ) <sub>4</sub>                   | DPPP                 | K <sub>2</sub> CO <sub>3</sub>     | DCE        | 52               | 12               | 8                | 5                | 20                             |
| 17                    | Pd(PPh <sub>3</sub> ) <sub>4</sub>                   | DPPB                 | K <sub>2</sub> CO <sub>3</sub>     | DCE        | 43               | 15               | 25               | 8                | 5                              |
| 18                    | Pd(PPh <sub>3</sub> ) <sub>4</sub>                   | DPPF                 | K <sub>2</sub> CO <sub>3</sub>     | DCE        | NR               | 17               | 70               | 10               | trace                          |
| 19                    | Pd(PPh <sub>3</sub> ) <sub>4</sub>                   | L <sub>1</sub>       | K <sub>2</sub> CO <sub>3</sub>     | DCE        | 78               | 10               | trace            | 8                | trace                          |
| 20 <sup>c</sup>       | Pd(PPh <sub>3</sub> ) <sub>4</sub>                   | L <sub>1</sub>       | K <sub>2</sub> CO <sub>3</sub>     | DCE        | 41               | 3                | 3                | 7                | 42                             |
| 21 <sup>d</sup>       | Pd(PPh <sub>3</sub> ) <sub>4</sub>                   | L <sub>1</sub>       | K <sub>2</sub> CO <sub>3</sub>     | DCE        | 63               | 3                | 5                | 5                | 20                             |
| <b>22<sup>e</sup></b> | <b>Pd(PPh<sub>3</sub>)<sub>4</sub></b>               | <b>L<sub>1</sub></b> | <b>K<sub>2</sub>CO<sub>3</sub></b> | <b>DCE</b> | <b>89</b>        | <b>3</b>         | <b>trace</b>     | <b>5</b>         | <b>trace</b>                   |
| 23 <sup>f</sup>       | Pd(PPh <sub>3</sub> ) <sub>4</sub>                   | L <sub>1</sub>       | K <sub>2</sub> CO <sub>3</sub>     | DCE        | 55               | 3                | 4                | trace            | 33                             |

<sup>a</sup>Unless otherwise noted, all reactions were performed with **1a** (0.1 mmol), **2a** (2.0 equiv), [Pd] (10 mol %), Cu<sub>2</sub>O (20 mol %), ligand (12 mol %), and base (2.0 equiv) in solvent (1.0 mL) at 100 °C for 19 h.

<sup>b</sup>Yields are given for isolated products, diastereoselectivity of the product is > 20:1. <sup>c</sup>The reaction was conducted at 80 °C. <sup>d</sup>The reaction was conducted at 90 °C. <sup>e</sup>The reaction was conducted at 110 °C. <sup>f</sup>The reaction was conducted in the absence of Cu<sub>2</sub>O.

The initial investigation began by employing aryl iodide **1a** as the starting point and 4-methyl-*N*-(prop-2-yn-1-yl)aniline **2a** as the coupling reagent. It has turned out that dearomative Heck annulation/phenyl electrophilic addition product **3a** was challenging to be obtained due to the reason that a series of by-products including reductive Heck by-product **3aa**, Sonogashira coupling by-product **3ab**, and Heck/Sonogashira coupling by-product **3ac** were observed in this transformation. To our gratification, the reaction worked well in the presence of Pd<sub>2</sub>(dba)<sub>3</sub> (10 mol %), Cu<sub>2</sub>O (20 mol %), PPh<sub>3</sub> (12 mol %), and Cs<sub>2</sub>CO<sub>3</sub> (2.0 equiv) in tetrahydrofuran at 100 °C for 19 h and led to the desired product **3a**, Sonogashira coupling by-product **3ab**, and Heck/Sonogashira coupling by-product **3ac** in 24%, 11%, 23% yields, respectively. And 39% of the raw material **1a** was recycled (Table 1, entry 1). A subsequent exploration on the effect of solvent was investigated, the reactions in 1,2-dichloroethane, 1,4-dioxane, and toluene furnished the corresponding product **3a** in 50%, 36%, and 46% yields, respectively, while no product was observed in acetonitrile. Nevertheless, the reductive Heck by-product **3aa** was obtained in 65% yield in acetonitrile, which suggested that strong polar solvent was beneficial to the assembly of reductive Heck by-product (entries 2-5). Some representative inorganic bases were then examined, which revealed that K<sub>2</sub>CO<sub>3</sub> was found to be superior to Cs<sub>2</sub>CO<sub>3</sub>, while <sup>t</sup>BuOLi, KHCO<sub>3</sub>, NaHCO<sub>3</sub>, and Na<sub>2</sub>CO<sub>3</sub> were inefficient in promoting the efficiency of the transformation. Of note, the effect of base had a weak influence on the yield of this transformation (entries 6-10). Upon further screening of various palladium catalysts such as Pd(PPh<sub>3</sub>)<sub>2</sub>Cl<sub>2</sub>, Pd(PPh<sub>2</sub>Me)<sub>2</sub>Cl<sub>2</sub>, Pd(OAc)<sub>2</sub>, and Pd(PPh<sub>3</sub>)<sub>4</sub> indicated that Pd(PPh<sub>3</sub>)<sub>4</sub> was optimal for the catalytic system, which afforded **3a** in 59% yield. And Pd(PPh<sub>3</sub>)<sub>2</sub>Cl<sub>2</sub>, Pd(PPh<sub>2</sub>Me)<sub>2</sub>Cl<sub>2</sub>, and Pd(OAc)<sub>2</sub> catalysts were favorable to form Heck/Sonogashira coupling by-product **3ac**, reductive Heck by-product **3aa**, and Heck/Sonogashira coupling by-product **3ac**, respectively (entries 11-14). Next, various monodentate and bis-monodentate phosphorus ligands were surveyed, regrettably, no better result was obtained. Among which, bis-monodentate phosphorus ligand DPPF could not furnish the desired product (entries 15-18). Gratifyingly, simply by switching from PPh<sub>3</sub> to phosphoramidite ligand **L**<sub>1</sub> under otherwise identical conditions did enhance remarkably the efficiency of the reaction, and the yield of **3a** was obviously increased to 78% (entry 19). Distinctly lower yields were observed by decreasing the temperature to 80 °C and 90 °C, leading to the desired product in 41% and 63% yields, respectively, accompanying the recovery of 42% and 20% raw material (entries 20-21). In sharp contrast, the result was sharply enhanced to 89% yield when carrying out the reaction at 110 °C (entry 22). Of note, a lower yield of 55% was obtained in the absence of Cu<sub>2</sub>O with the recovery of 33% raw material, suggesting that Cu<sub>2</sub>O may act as a critical additive in this transformation (entry 23). The molecular configuration of **3a** was definitely established by X-ray crystallographic analysis. Of note, the desired product was afforded with excellent diastereoselectivity (> 20:1), which was determined by <sup>1</sup>H NMR analysis. Ultimately, the optimized conditions were identified to be; aryl iodide **1a** (0.1 mmol) and 4-methyl-*N*-(prop-2-yn-1-yl)aniline **2a** (2.0 equiv) in the presence of Pd(PPh<sub>3</sub>)<sub>4</sub> (10 mol %), Cu<sub>2</sub>O (20 mol %), phosphoramidite ligand **L**<sub>1</sub> (12 mol %), and K<sub>2</sub>CO<sub>3</sub> (2.0 equiv) in 1,2-dichloroethane at 110 °C for 19 h under an argon atmosphere.

## 4. Procedure for the tandem cyclization of indoles with *N*-propargylated aniline.

### 4.1 Synthesis of products 3

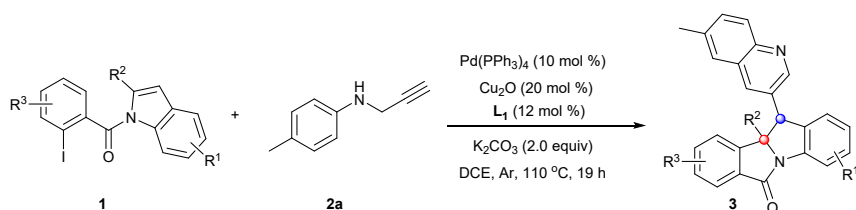

An oven-dried Schlenk tube charged with *N*-(2-Iodobenzoyl)indole derivative **1** (0.1 mmol), *N*-propargylated aniline **2a** (2.0 equiv), Pd(PPh<sub>3</sub>)<sub>4</sub> (10 mol%), L<sub>1</sub> (12 mol%), K<sub>2</sub>CO<sub>3</sub> (2.0 equiv), Cu<sub>2</sub>O (20 mol%) in DCE (1.0 mL), the reactions were conducted under Ar atmosphere and stirred at 110 °C for 19.0 h. The reaction was monitored by TLC. Then, the reaction mixture was cooled down to room temperature and evaporated under reduced pressure. The residue was further purified by chromatography on silica gel to afford the corresponding products. Cs<sub>2</sub>CO<sub>3</sub> (2.0 equiv) instead of K<sub>2</sub>CO<sub>3</sub> (2.0 equiv) was used for the formation of **3g-3o**.

### 4.2 Synthesis of products 5

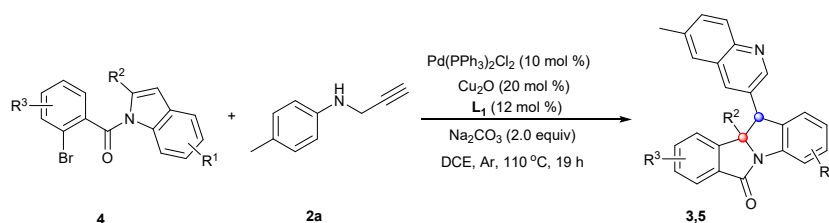

An oven-dried Schlenk tube charged with *N*-(2-bromobenzoyl)indole derivative **4** (0.1 mmol), *N*-propargylated aniline **2a** (2.0 equiv), Pd(PPh<sub>3</sub>)<sub>2</sub>Cl<sub>2</sub> (10 mol%), L<sub>1</sub> (12 mol%), Na<sub>2</sub>CO<sub>3</sub> (2.0 equiv), Cu<sub>2</sub>O (20 mol%) in DCE (1.0 mL), the reactions were conducted under Ar atmosphere and stirred at 110 °C for 19.0 h. The reaction was monitored by TLC. Then, the reaction mixture was cooled down to room temperature and evaporated under reduced pressure. The residue was further purified by chromatography on silica gel to afford the corresponding products.

### 4.3 Synthesis of products 6

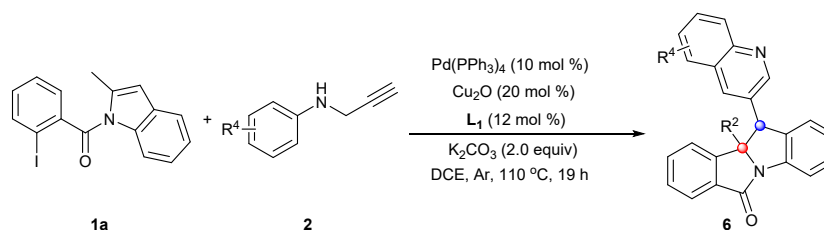

An oven-dried Schlenk tube charged with *N*-(2-Iodobenzoyl)indole derivative **1a** (0.1 mmol), *N*-propargylated aniline derivative **2** (4.0 equiv), Pd(PPh<sub>3</sub>)<sub>4</sub> (10 mol%), L<sub>1</sub> (12 mol%), K<sub>2</sub>CO<sub>3</sub> (2.0 equiv), Cu<sub>2</sub>O (20 mol%) in DCE (1.0 mL) the reactions were conducted under Ar atmosphere and stirred at 110 °C for 19.0 h. The reaction was monitored by TLC. Then, the reaction mixture was cooled down to room temperature and evaporated under reduced pressure. The residue was further purified by chromatography on silica gel to afford the corresponding products.

## 5. Mechanistic studies

### 5.1 H/D-exchange study

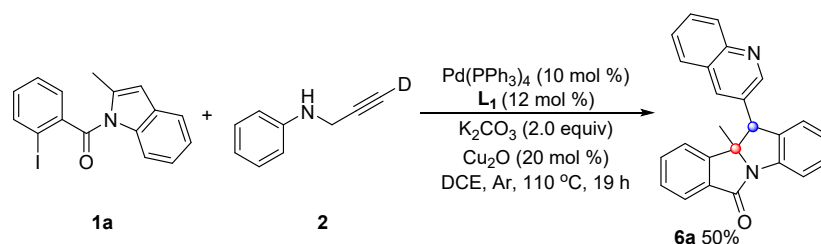

An oven-dried Schlenk tube charged with **1a** (0.1 mmol), [31% D]-**2** (2.0 equiv), Pd(PPh<sub>3</sub>)<sub>4</sub> (10 mol%), L<sub>1</sub> (12 mol %), K<sub>2</sub>CO<sub>3</sub> (2.0 equiv), Cu<sub>2</sub>O (20 mol %) in DCE (1.0 mL) the reaction was conducted under Ar atmosphere and stirred at 110 °C for 19.0 h. The reaction was monitored by TLC. Then, the reaction mixture was cooled down to room temperature and evaporated under reduced pressure. The residue was further purified by chromatography on silica gel to afford the corresponding product **6a** in 50% yield with 0% D.



$^1\text{H}$  NMR spectrum of [31% D]-2 ( $\text{CDCl}_3$ , 400 MHz)

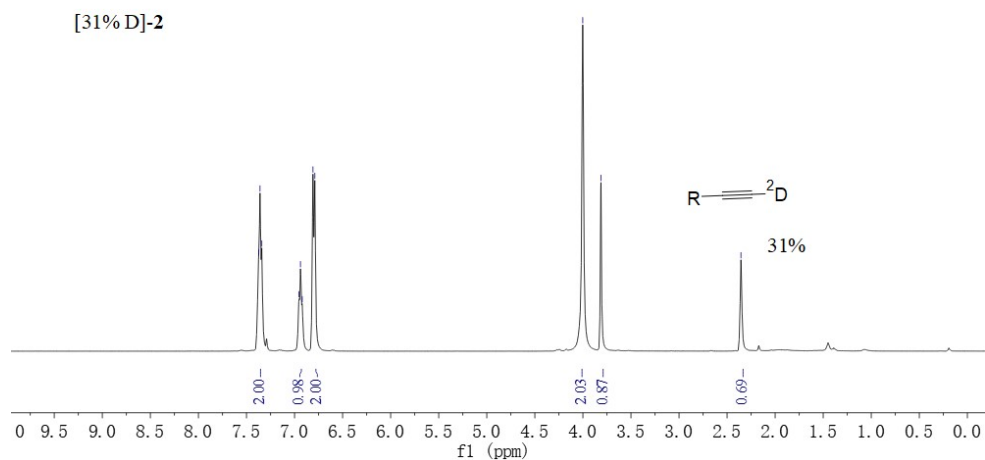

$^1\text{H}$  NMR spectrum of **6a** ( $\text{CDCl}_3$ , 400 MHz)

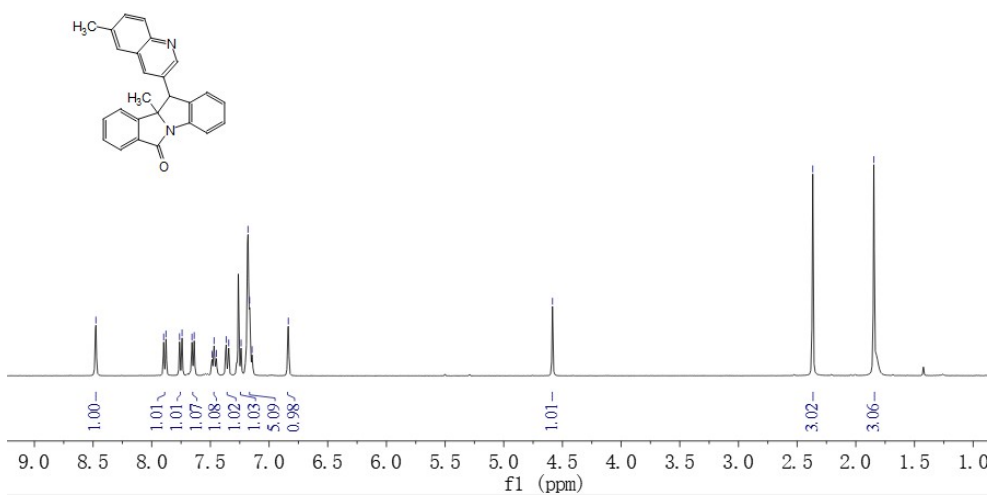

## 5.2 Intermolecular KIE competition

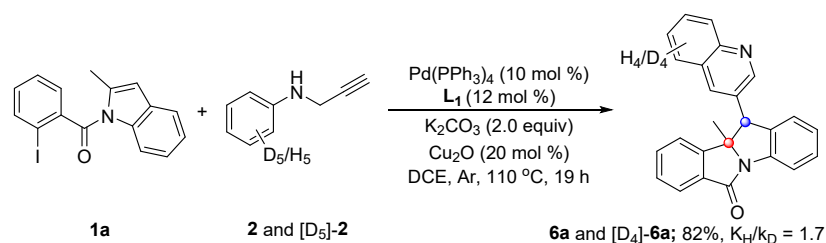

An oven-dried Schlenk tube charged with **1a** (0.1 mmol), **2** (1.0 equiv),  $[\text{D}_5]\text{-2}$  (1.0 equiv),  $\text{Pd(PPh}_3)_4$  (10 mol%),  $\text{L}_1$  (12 mol%),  $\text{K}_2\text{CO}_3$  (2.0 equiv),  $\text{Cu}_2\text{O}$  (20 mol%) in DCE (1.0 mL) the reaction was conducted under Ar atmosphere and stirred at 110 °C for 19.0 h. The reaction was monitored by TLC. Then, the reaction mixture was cooled down to room temperature and evaporated

under reduced pressure. The residue was further purified by chromatography on silica gel to afford the corresponding product mixture of **6a** and [D<sub>4</sub>]-**6a** with a yield of 82%. The  $k_H/k_D$  was determined by <sup>1</sup>H-NMR spectroscopy.

<sup>1</sup>H NMR spectrum of **6a** and [D<sub>4</sub>]-**6a** (CDCl<sub>3</sub>, 400 MHz)

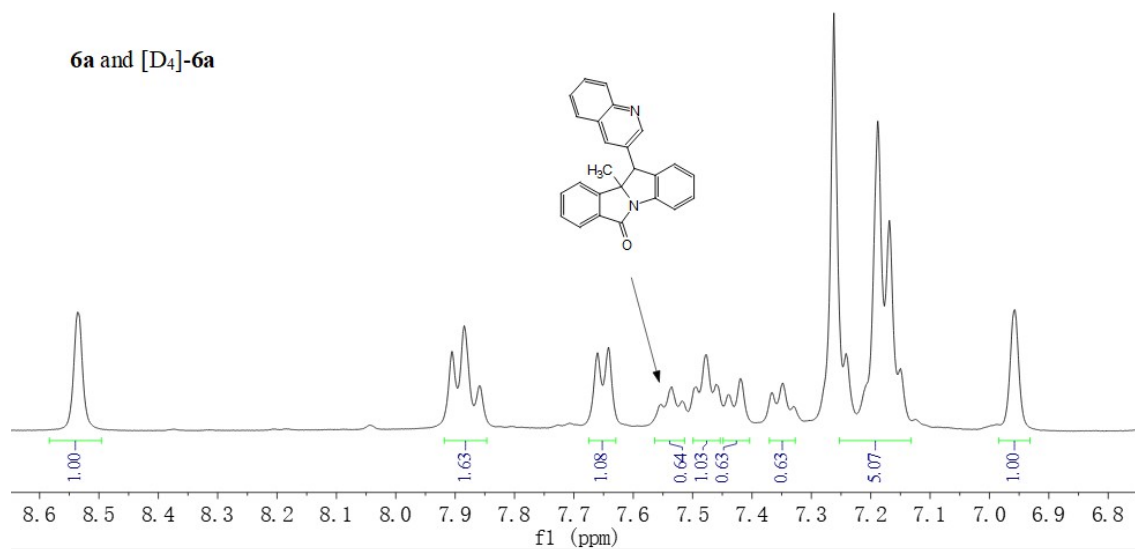

<sup>1</sup>H NMR spectrum of **6a** and [D<sub>4</sub>]-**6a** (CDCl<sub>3</sub>, 400 MHz)

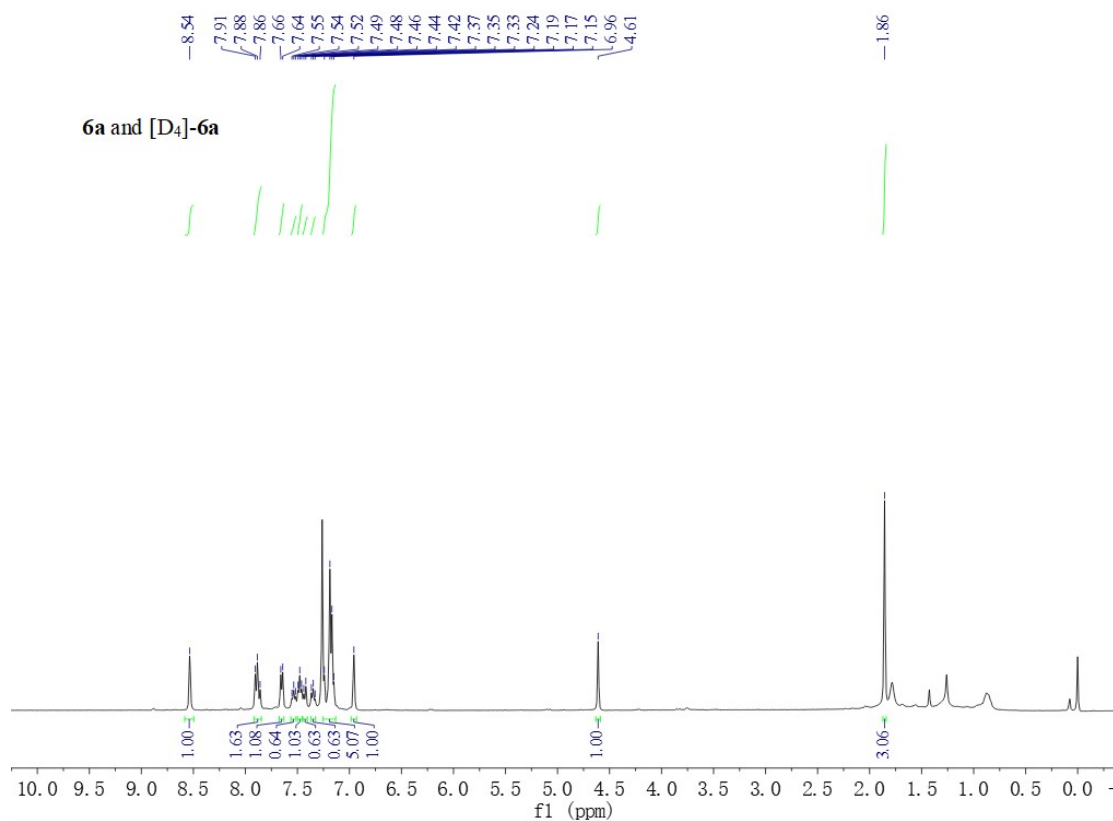

## 6. Characterization data of 3a-8

General procedure:  $^1\text{H}$  and  $^{13}\text{C}$  NMR spectra were recorded on a Bruker AC-P 400 spectrometer (400 MHz for  $^1\text{H}$ , 100 MHz for  $^{13}\text{C}$ ) in  $\text{CDCl}_3$  (with TMS as internal standard). Chemical shifts ( $\delta$ ) were measured in ppm. Coupling constants,  $J$ , are reported in hertz. Mass data were measured with Thermo Scientific DSQ II mass spectrometer and Bruker O-TOF Compact Mass Spectrometry. Melting points (uncorrected) were obtained on Shanghai Inesa WRS-3 melting point apparatus. Thin-layer chromatography (TLC) was performed using 60 mesh silica gel plates visualized with short-wavelength UV light (254 nm).

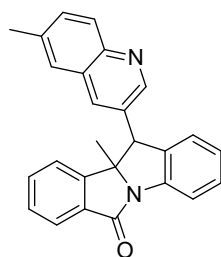

**(3a)** **10b-methyl-11-(6-methylquinolin-3-yl)-10b,11-dihydro-6H-isoindolo[2,1-a]indol-6-one.** Purified by chromatography on silica gel, eluting with ethyl acetate/petroleum ether 1:1 (v/v); brown solid; m.p. = 209-211 °C 33.5 mg, 89% yield.  $^1\text{H}$  NMR (400 MHz,  $\text{CDCl}_3$ )  $\delta$ : 8.47 (s, 1H), 7.89 (d,  $J$  = 8.0 Hz, 1H), 7.75 (d,  $J$  = 8.0 Hz, 1H), 7.64 (d,  $J$  = 8.0 Hz, 1H), 7.46 (t,  $J$  = 8.0 Hz, 1H), 7.34 (d,  $J$  = 8.0 Hz, 1H), 7.23 (d,  $J$  = 8.0 Hz, 1H), 7.19-7.13 (m, 5H), 6.85 (s, 1H), 4.59 (s, 1H), 2.35 (s, 3H), 1.84 (s, 3H);  $^{13}\text{C}$  NMR (100 MHz,  $\text{CDCl}_3$ )  $\delta$ : 168.1, 149.6, 147.8, 145.5, 139.2, 137.9, 136.5, 133.5, 133.4, 132.7, 132.5, 131.5, 129.1, 128.4, 128.4, 127.4, 126.5, 125.2, 124.4, 122.8, 117.3, 76.0, 54.2, 28.2, 21.3; **HRMS** (ESI):  $m/z$  calcd for  $\text{C}_{26}\text{H}_{21}\text{N}_2\text{O}^+$   $[\text{M}+\text{H}]^+$  377.1648. Found 377.1647. [Daicel Chiralpak AS-H column (25 cm  $\times$  0.46 cm ID),  $n$ -hexane/ $i$ -PrOH = 99/1, 1 mL/min, 254nm;  $t$  major = 22.65 min,  $t$  minor = 18.51 min].

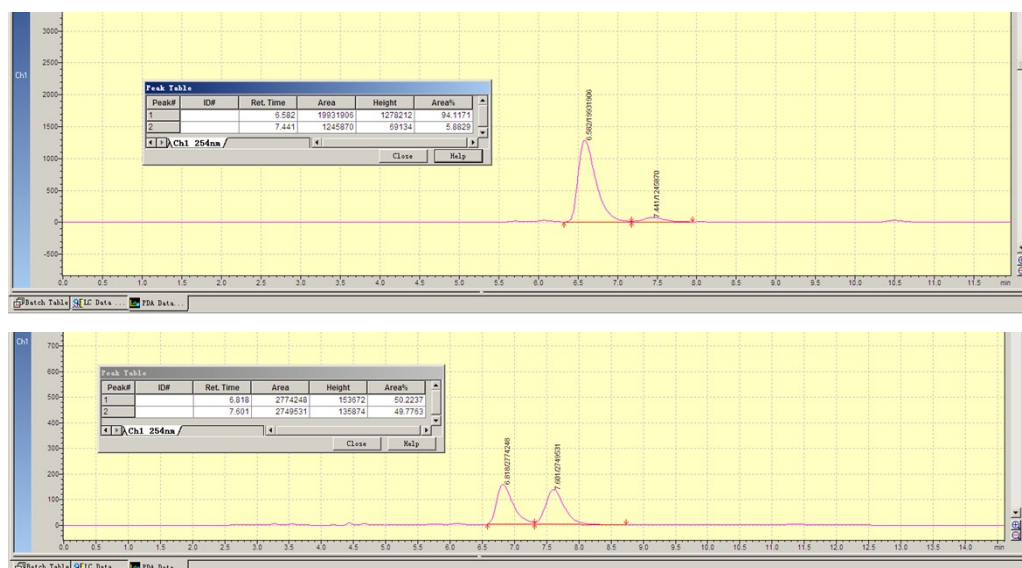

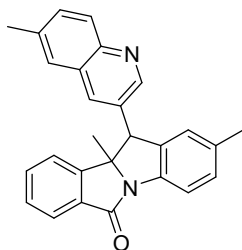

**(3b) 10b-dimethyl-11-(6-methylquinolin-3-yl)-10b,11-dihydro-6H-isoindolo[2,1-a]indol-6-one.** Purified by chromatography on silica gel, eluting with ethyl acetate/petroleum ether 1:1 (v/v); brown solid; m.p. = 237-239 °C 33.6 mg, 86% yield.  $^1\text{H NMR}$  (400 MHz,  $\text{CDCl}_3$ )  $\delta$ : 8.47 (s, 1H), 7.77-7.74 (m, 2H), 7.64 (d,  $J = 8.0$  Hz, 1H), 7.35 (d,  $J = 8.0$  Hz, 1H), 7.23 (d,  $J = 8.0$  Hz, 2H), 7.19-7.13 (m, 3H), 6.99 (s, 1H), 6.86 (s, 1H), 4.53 (s, 1H), 2.37 (s, 3H), 2.31 (s, 3H), 1.83 (s, 3H);  $^{13}\text{C NMR}$  (100 MHz,  $\text{CDCl}_3$ )  $\delta$ : 168.0, 149.7, 147.8, 145.5, 138.1, 136.9, 136.5, 135.1, 133.6, 133.5, 132.9, 132.4, 131.5, 129.7, 128.4, 127.5, 127.1, 126.6, 124.4, 122.7, 117.0, 76.2, 54.3, 28.2, 21.4, 21.2; **HRMS** (ESI):  $m/z$  calcd for  $\text{C}_{27}\text{H}_{23}\text{N}_2\text{O}^+ [\text{M}+\text{H}]^+$  391.1805. Found 391.1806.

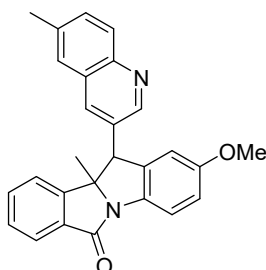

**(3c) 2-methoxy-10b-methyl-11-(6-methylquinolin-3-yl)-10b,11-dihydro-6H-isoindolo[2,1-a]indol-6-one.** Purified by chromatography on silica gel, eluting with ethyl acetate/petroleum ether 1:1 (v/v); brown liquid; 28.8 mg, 71% yield.  $^1\text{H NMR}$  (400 MHz,  $\text{CDCl}_3$ )  $\delta$ : 8.48 (s, 1H), 7.79 (d,  $J = 8.0$  Hz, 1H), 7.75 (d,  $J = 8.0$  Hz, 1H), 7.63 (d,  $J = 8.0$  Hz, 1H), 7.36 (d,  $J = 8.0$  Hz, 1H), 7.23-7.14 (m, 4H), 7.00 (d,  $J = 8.0$  Hz, 1H), 6.86 (s, 1H), 6.75 (s, 1H), 4.53 (s, 1H), 3.76 (s, 3H), 2.38 (s, 3H), 1.84 (s, 3H).  $^{13}\text{C NMR}$  (100 MHz,  $\text{CDCl}_3$ )  $\delta$ : 168.1, 157.7, 149.6, 147.7, 145.5, 139.4, 136.6, 133.6, 133.3, 132.9, 132.9, 132.3, 131.6, 128.5, 128.4, 127.5, 126.6, 124.4, 122.7, 118.0, 114.3, 112.4, 76.4, 55.7, 54.6, 28.1, 21.4. **HRMS** (ESI):  $m/z$  calcd for  $\text{C}_{27}\text{H}_{23}\text{N}_2\text{O}_2^+ [\text{M}+\text{H}]^+$  407.1754. Found 407.1752.

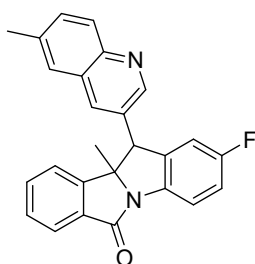

**(3d) 2-fluoro-10b-methyl-11-(6-methylquinolin-3-yl)-10b,11-dihydro-6H-isoindolo[2,1-a]indol-6-one.** Purified by chromatography on silica gel, eluting with ethyl acetate/petroleum ether 1:1 (v/v); brown solid, m.p. = 205-207 °C; 35.1 mg, 89% yield.  $^1\text{H NMR}$  (400 MHz,  $\text{CDCl}_3$ )  $\delta$ : 8.45 (s, 1H), 7.84-7.81 (m, 1H), 7.76 (d,  $J = 8.0$  Hz, 1H), 7.64 (d,  $J = 8.0$  Hz, 1H), 7.37 (d,  $J = 8.0$  Hz, 1H), 7.24 (s, 1H), 7.20 (s, 1H), 7.19-7.15 (m, 3H), 6.91 (d,  $J = 8.0$  Hz, 1H), 6.85 (s, 1H), 4.56 (s, 1H), 2.38 (s, 3H), 1.85 (s, 3H);  $^{13}\text{C NMR}$  (100 MHz,  $\text{CDCl}_3$ )  $\delta$ : 168.2, 161.7, 159.2, 149.4, 147.7, 145.6, 139.7, 139.6, 136.7, 133.4, 132.8, 132.6, 132.5, 131.7, 128.6, 128.5, 127.4, 126.5, 124.6, 122.8, 118.3, 118.2, 116.0,

115.8, 114.0, 113.8, 76.5, 54.5, 28.1, 21.4; **HRMS** (ESI):  $m/z$  calcd for  $C_{26}H_{20}FN_2O^+$   $[M+H]^+$  395.1554. Found 395.1553.

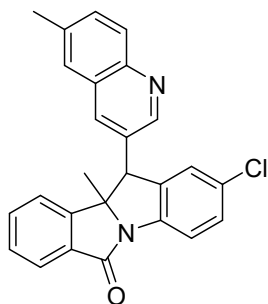

**(3e)2-chloro-10b-methyl-11-(6-methylquinolin-3-yl)-10b,11-dihydro-6H-isoindolo[2,1-a]indol-6-one.** Purified by chromatography on silica gel, eluting with ethyl acetate/petroleum ether 1:1 (v/v); brown solid, m.p. = 157-159 °C; 31.6 mg, 77% yield. **<sup>1</sup>H NMR** (400 MHz,  $CDCl_3$ )  $\delta$ : 8.45 (s, 1H), 7.81 (d,  $J$  = 8.0 Hz, 1H), 7.76 (d,  $J$  = 8.0 Hz, 1H), 7.65 (d,  $J$  = 8.0 Hz, 1H), 7.44 (d,  $J$  = 8.0 Hz, 1H), 7.38 (d,  $J$  = 8.0 Hz, 1H), 7.25 (s, 1H), 7.20 (d,  $J$  = 8.0 Hz, 1H), 7.17-7.15 (m, 3H), 6.86 (s, 1H), 4.56 (s, 1H), 2.39 (s, 3H), 1.84 (s, 3H); **<sup>13</sup>C NMR** (100 MHz,  $CDCl_3$ )  $\delta$ : 168.1, 149.4, 147.6, 145.6, 139.6, 137.9, 136.8, 133.4, 132.8, 132.8, 132.4, 131.7, 130.4, 129.3, 128.7, 128.5, 127.4, 126.8, 126.6, 124.6, 122.8, 118.2, 76.3, 54.3, 28.3, 21.4; **HRMS** (ESI):  $m/z$  calcd for  $C_{26}H_{20}ClN_2O^+$   $[M+H]^+$  411.1259. Found 411.1259.

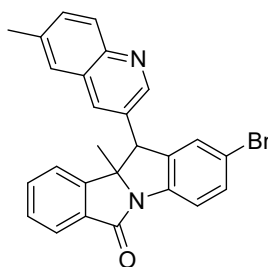

**(3f)2-bromo-10b-methyl-11-(6-methylquinolin-3-yl)-10b,11-dihydro-6H-isoindolo[2,1-a]indol-6-one.** Purified by chromatography on silica gel, eluting with ethyl acetate/petroleum ether 1:1 (v/v); brown solid, m.p. = 90-92 °C; 29.5 mg, 65% yield. **<sup>1</sup>H NMR** (400 MHz,  $CDCl_3$ )  $\delta$ : 8.43 (s, 1H), 7.77 (d,  $J$  = 12.0 Hz, 2H), 7.69 (d,  $J$  = 8.0 Hz, 1H), 7.58 (d,  $J$  = 8.0 Hz, 1H), 7.46 (d,  $J$  = 8.0 Hz, 1H), 7.37 (d,  $J$  = 8.0 Hz, 1H), 7.32 (s, 1H), 7.25 (d,  $J$  = 8.0 Hz, 1H), 7.20 (d,  $J$  = 8.0 Hz, 1H), 7.16 (d,  $J$  = 8.0 Hz, 1H), 6.87 (s, 1H), 4.56 (s, 1H), 2.38 (s, 3H), 1.84 (s, 3H); **<sup>13</sup>C NMR** (100 MHz,  $CDCl_3$ )  $\delta$ : 168.0, 149.3, 147.6, 145.6, 140.0, 138.3, 136.7, 133.4, 132.8, 132.7, 132.3, 132.2, 131.7, 129.6, 128.5, 128.5, 127.4, 126.5, 124.6, 122.8, 118.6, 117.9, 76.2, 54.2, 28.2, 21.4; **HRMS** (ESI):  $m/z$  calcd for  $C_{26}H_{20}BrN_2O^+$   $[M+H]^+$  455.0754. Found 455.0755.

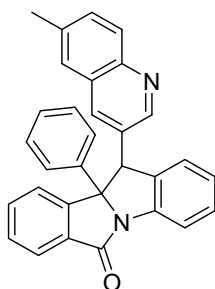

**(3g) 11-(6-methylquinolin-3-yl)-10b-phenyl-10b,11-dihydro-6H-isoindolo[2,1-a]indol-6-one.** Purified by chromatography on silica gel, eluting with ethyl acetate/petroleum ether 1:1 (v/v); brown

solid, m.p. = 249-251 °C; 30.6 mg, 70% yield. **<sup>1</sup>H NMR** (400 MHz, CDCl<sub>3</sub>) δ: 8.69 (s, 1H), 8.00 (d, *J* = 8.0 Hz, 1H), 7.79 (d, *J* = 8.0 Hz, 3H), 7.61 (d, *J* = 8.0 Hz, 1H), 7.46 (t, *J* = 8.0 Hz, 1H), 7.39-7.36 (m, 3H), 7.31-7.29 (m, 2H), 7.22 (s, 1H), 7.18-7.06 (m, 4H), 6.99 (s, 1H), 5.23 (s, 1H), 2.38 (s, 3H); **<sup>13</sup>C NMR** (100 MHz, CDCl<sub>3</sub>) δ: 168.7, 149.8, 147.1, 145.6, 143.1, 139.8, 137.6, 136.7, 134.0, 133.2, 132.7, 132.1, 131.7, 129.2, 129.0, 128.5, 128.5, 128.1, 127.6, 126.6, 126.2, 125.6, 125.0, 124.5, 123.8, 117.2, 81.2, 56.1, 21.4; **HRMS** (ESI): *m/z* calcd for C<sub>31</sub>H<sub>23</sub>N<sub>2</sub>O<sup>+</sup> [M+H]<sup>+</sup> 439.1805. Found 439.1804.

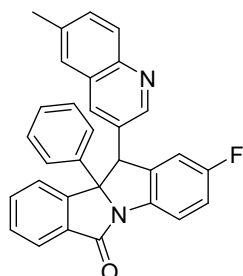

**(3h)2-fluoro-11-(6-methylquinolin-3-yl)-10b-phenyl-10b,11-dihydro-6H-isoindolo[2,1-a]indol-6-one.** Purified by chromatography on silica gel, eluting with ethyl acetate/petroleum ether 1:1 (v/v); brown solid, m.p. = 108-110 °C; 32.4 mg, 71% yield. **<sup>1</sup>H NMR** (400 MHz, CDCl<sub>3</sub>) δ: 8.66 (s, 1H), 7.96-7.93 (m, 1H), 7.81-7.76 (m, 3H), 7.60 (d, *J* = 8.0 Hz, 1H), 7.39 (t, *J* = 8.0 Hz, 3H), 7.32-7.26 (m, 3H), 7.16 (t, *J* = 8.0 Hz, 2H), 7.10-7.07 (m, 1H), 7.01 (s, 1H), 6.81 (d, *J* = 8.0 Hz, 1H), 5.21 (s, 1H), 2.39 (s, 3H); **<sup>13</sup>C NMR** (100 MHz, CDCl<sub>3</sub>) δ: 168.8, 161.8, 159.4, 149.6, 147.0, 145.7, 142.8, 139.5, 139.4, 136.9, 136.0, 133.9, 132.8, 132.4, 131.9, 131.8, 129.1, 128.6, 128.5, 128.3, 127.5, 126.6, 125.0, 124.5, 123.8, 118.2, 118.1, 116.1, 115.8, 113.8, 113.6, 81.7, 56.3, 21.4; **HRMS** (ESI): *m/z* calcd for C<sub>31</sub>H<sub>22</sub>FN<sub>2</sub>O<sup>+</sup> [M+H]<sup>+</sup> 457.1711. Found 457.1714.

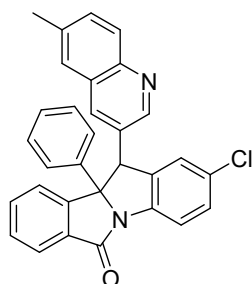

**(3i)2-chloro-11-(6-methylquinolin-3-yl)-10b-phenyl-10b,11-dihydro-6H-isoindolo[2,1-a]indol-6-one.** Purified by chromatography on silica gel, eluting with ethyl acetate/petroleum ether 1:1 (v/v); brown solid, m.p. = 94-96 °C; 29.3 mg, 62% yield. **<sup>1</sup>H NMR** (400 MHz, CDCl<sub>3</sub>) δ: 8.66 (s, 1H), 7.96-7.93 (m, 1H), 7.81-7.76 (m, 3H), 7.60 (d, *J* = 8.0 Hz, 1H), 7.39 (t, *J* = 8.0 Hz, 3H), 7.30 (t, *J* = 8.0 Hz, 2H), 7.25 (s, 1H), 7.16 (t, *J* = 8.0 Hz, 2H), 7.10-7.07 (m, 1H), 7.01 (s, 1H), 6.81 (d, *J* = 8.0 Hz, 1H), 5.21 (s, 1H), 2.39 (s, 3H); **<sup>13</sup>C NMR** (100 MHz, CDCl<sub>3</sub>) δ: 168.8, 161.8, 159.4, 149.6, 147.0, 145.7, 142.7, 139.5, 139.4, 136.9, 136.0, 133.9, 132.8, 132.4, 131.9, 131.8, 129.1, 128.6, 128.5, 128.3, 127.5, 126.6, 125.0, 124.5, 123.8, 118.2, 118.1, 116.1, 115.8, 113.8, 113.6, 81.7, 56.2, 21.4; **HRMS** (ESI): *m/z* calcd for C<sub>31</sub>H<sub>22</sub>ClN<sub>2</sub>O<sup>+</sup> [M+H]<sup>+</sup> 473.1415. Found 473.1412.

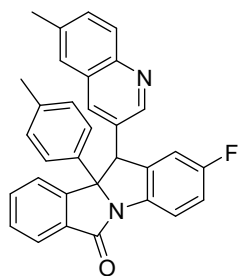

**(3j)2-fluoro-11-(6-methylquinolin-3-yl)-10b-(p-tolyl)-10b,11-dihydro-6H-isoindolo[2,1-a]indol-6-one.** Purified by chromatography on silica gel, eluting with ethyl acetate/petroleum ether 1:1 (v/v); brown solid, m.p. = 203-205 °C; 32.4 mg, 69% yield. <sup>1</sup>H NMR (400 MHz, CDCl<sub>3</sub>) δ: 8.65 (s, 1H), 7.94-7.91 (m, 1H), 7.80 (d, *J* = 12.0 Hz, 1H), 7.64 (d, *J* = 8.0 Hz, 2H), 7.59 (d, *J* = 8.0 Hz, 1H), 7.40 (d, *J* = 8.0 Hz, 1H), 7.28-7.26 (m, 3H), 7.20 (d, *J* = 8.0 Hz, 2H), 7.16 (d, *J* = 8.0 Hz, 1H), 7.10-7.07 (m, 1H), 6.99 (s, 1H), 6.81 (d, *J* = 8.0 Hz, 1H), 5.19 (s, 1H), 2.40 (s, 3H), 2.31 (s, 3H); <sup>13</sup>C NMR (100 MHz, CDCl<sub>3</sub>) δ: 168.8, 161.8, 159.4, 149.6, 147.2, 145.7, 139.7, 139.6, 139.5, 138.2, 136.9, 136.0, 133.9, 132.8, 132.5, 131.9, 131.8, 129.8, 128.5, 127.5, 126.6, 124.9, 124.5, 123.7, 118.2, 118.1, 116.1, 115.8, 113.8, 113.6, 81.6, 56.2, 21.4, 21.0; **HRMS** (ESI): *m/z* calcd for C<sub>32</sub>H<sub>24</sub>FN<sub>2</sub>O<sup>+</sup> [M+H]<sup>+</sup> 471.1867. Found 471.1865.

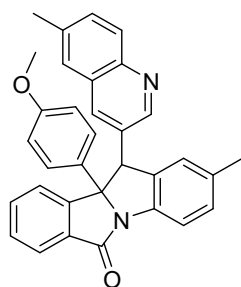

**(3k)10b-(4-methoxyphenyl)-2-methyl-11-(6-methylquinolin-3-yl)-10b,11-dihydro-6H-isoindolo[2,1-a]indol-6-one.** Purified by chromatography on silica gel, eluting with ethyl acetate/petroleum ether 1:1 (v/v); brown solid, m.p. = 138-140 °C; 31.3 mg, 65% yield. <sup>1</sup>H NMR (400 MHz, CDCl<sub>3</sub>) δ: 8.66 (s, 1H), 7.86 (d, *J* = 8.0 Hz, 1H), 7.78 (d, *J* = 8.0 Hz, 1H), 7.67 (d, *J* = 8.0 Hz, 2H), 7.59 (d, *J* = 8.0 Hz, 1H), 7.37 (d, *J* = 8.0 Hz, 1H), 7.23 (d, *J* = 12.0 Hz, 3H), 7.15-7.12 (m, 1H), 7.07-7.04 (m, 1H), 7.00 (s, 1H), 6.89 (s, 2H), 6.87 (s, 1H), 5.14 (s, 1H), 3.73 (s, 3H), 2.37 (s, 3H), 2.24 (s, 3H); <sup>13</sup>C NMR (100 MHz, CDCl<sub>3</sub>) δ: 168.6, 159.3, 149.9, 147.4, 145.6, 137.9, 137.4, 136.6, 135.4, 135.0, 134.0, 133.3, 132.5, 132.1, 131.6, 129.7, 128.5, 128.3, 127.6, 126.8, 126.6, 126.2, 124.3, 123.7, 116.9, 114.3, 81.1, 56.0, 55.2, 21.4, 21.1; **HRMS** (ESI): *m/z* calcd for C<sub>33</sub>H<sub>27</sub>N<sub>2</sub>O<sub>2</sub><sup>+</sup> [M+H]<sup>+</sup> 483.2067. Found 483.2066.

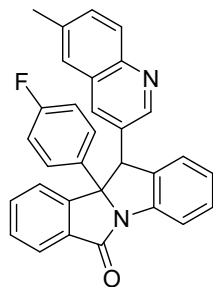

**(3l)10b-(4-fluorophenyl)-11-(6-methylquinolin-3-yl)-10b,11-dihydro-6H-isoindolo[2,1-a]indol-6-one.** Purified by chromatography on silica gel, eluting with ethyl acetate/petroleum ether 1:1 (v/v); brown solid, m.p. = 258-260 °C; 29.2 mg, 64% yield. <sup>1</sup>H NMR (400 MHz, CDCl<sub>3</sub>) δ: 8.66 (s, 1H), 7.99

(d,  $J = 8.0$  Hz, 1H), 7.80-7.73 (m, 3H), 7.61 (d,  $J = 8.0$  Hz, 1H), 7.47 (t,  $J = 8.0$  Hz, 1H), 7.39 (d,  $J = 12.0$  Hz, 1H), 7.25-7.20 (m, 2H), 7.16 (t,  $J = 8.0$  Hz, 1H), 7.12-7.04 (m, 5H), 6.97 (s, 1H), 5.17 (s, 1H), 2.38 (s, 3H);  $^{13}\text{C NMR}$  (100 MHz,  $\text{CDCl}_3$ )  $\delta$ : 168.6, 163.6, 161.2, 149.7, 147.0, 145.7, 139.7, 138.9, 138.9, 137.5, 136.8, 134.0, 133.0, 132.8, 132.0, 131.7, 129.3, 128.6, 128.5, 127.5, 126.9, 126.8, 126.6, 126.2, 125.8, 124.6, 123.7, 117.3, 116.0, 115.8, 80.8, 56.2, 21.4; **HRMS** (ESI):  $m/z$  calcd for  $\text{C}_{31}\text{H}_{22}\text{FN}_2\text{O}^+$   $[\text{M}+\text{H}]^+$  457.1711. Found 457.1710.

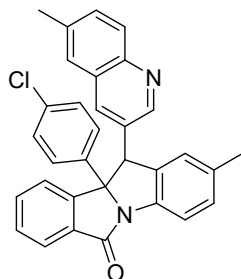

**(3m)10b-(4-chlorophenyl)-2-methyl-11-(6-methylquinolin-3-yl)-10b,11-dihydro-6H-isoindolo[2,1-a]indol-6-one.** Purified by chromatography on silica gel, eluting with ethyl acetate/petroleum ether 1:1 (v/v); brown solid, m.p. = 224-226 °C; 27.7 mg, 57% yield.  $^1\text{H NMR}$  (400 MHz,  $\text{CDCl}_3$ )  $\delta$ : 8.65 (s, 1H), 7.87 (d,  $J = 8.0$  Hz, 1H), 7.79 (d,  $J = 8.0$  Hz, 1H), 7.71 (d,  $J = 8.0$  Hz, 2H), 7.60 (d,  $J = 8.0$  Hz, 1H), 7.39 (d,  $J = 8.0$  Hz, 1H), 7.34 (d,  $J = 8.0$  Hz, 2H), 7.28 (s, 1H), 7.24 (s, 2H), 7.18-7.15 (m, 1H), 7.11-7.08 (m, 1H), 7.00 (s, 1H), 6.90 (s, 1H), 5.10 (s, 1H), 2.39 (s, 3H), 2.26 (s, 3H);  $^{13}\text{C NMR}$  (100 MHz,  $\text{CDCl}_3$ )  $\delta$ : 168.5, 149.7, 146.6, 145.7, 141.7, 137.5, 137.3, 136.7, 135.7, 134.0, 132.9, 132.7, 132.2, 131.7, 129.9, 129.1, 128.6, 128.5, 127.5, 126.8, 126.6, 126.5, 124.5, 123.6, 116.9, 81.0, 56.1, 21.4, 21.2; **HRMS** (ESI):  $m/z$  calcd for  $\text{C}_{32}\text{H}_{24}\text{ClN}_2\text{O}^+$   $[\text{M}+\text{H}]^+$  487.1572. Found 487.1572.

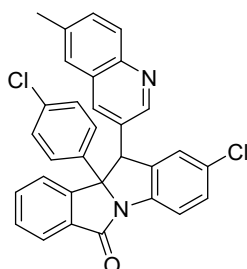

**(3n)2-chloro-10b-(4-chlorophenyl)-11-(6-methylquinolin-3-yl)-10b,11-dihydro-6H-isoindolo[2,1-a]indol-6-one.** Purified by chromatography on silica gel, eluting with ethyl acetate/petroleum ether 1:1 (v/v); brown solid, m.p. = 248-250 °C; 24.3 mg, 48% yield.  $^1\text{H NMR}$  (400 MHz,  $\text{CDCl}_3$ )  $\delta$ : 8.61 (s, 1H), 7.92 (d,  $J = 12.0$  Hz, 1H), 7.80 (d,  $J = 8.0$  Hz, 1H), 7.69 (d,  $J = 8.0$  Hz, 2H), 7.62 (d,  $J = 8.0$  Hz, 1H), 7.46-7.40 (m, 2H), 7.36 (d,  $J = 8.0$  Hz, 2H), 7.23 (s, 2H), 7.19 (t,  $J = 8.0$  Hz, 1H), 7.13 (d,  $J = 8.0$  Hz, 1H), 7.10-7.09 (m, 1H), 7.00 (s, 1H), 5.13 (s, 1H), 2.41 (s, 3H);  $^{13}\text{C NMR}$  (100 MHz,  $\text{CDCl}_3$ )  $\delta$ : 168.5, 149.4, 146.5, 145.8, 141.2, 139.1, 138.3, 137.0, 134.3, 133.9, 133.0, 132.1, 132.0, 131.7, 131.0, 129.5, 129.3, 128.9, 128.6, 127.4, 126.6, 126.5, 126.4, 124.8, 123.7, 118.2, 81.0, 56.0, 21.4; **HRMS** (ESI):  $m/z$  calcd for  $\text{C}_{31}\text{H}_{21}\text{Cl}_2\text{N}_2\text{O}^+$   $[\text{M}+\text{H}]^+$  507.1025. Found 507.1022.

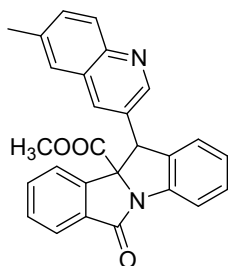



**(3o) methyl 11-(6-methylquinolin-3-yl)-6-oxo-6H-isoindolo[2,1-a]indole-10b(11H)-carboxylate.**

Purified by chromatography on silica gel, eluting with ethyl acetate/petroleum ether 1:1 (v/v); brown solid, m.p. = 194-196 °C; 32.4 mg, 77% yield. <sup>1</sup>H NMR (400 MHz, CDCl<sub>3</sub>) δ: 8.56 (s, 1H), 7.93 (d, *J* = 8.0 Hz, 1H), 7.78 (d, *J* = 8.0 Hz, 1H), 7.67 (d, *J* = 8.0 Hz, 1H), 7.50-7.45 (m, 1H), 7.39 (d, *J* = 8.0 Hz, 1H), 7.35 (d, *J* = 8.0 Hz, 1H), 7.25-7.22 (m, 3H), 7.19-7.16 (m, 2H), 6.97 (s, 1H), 5.45 (s, 1H), 3.75 (s, 3H), 2.39 (s, 3H); <sup>13</sup>C NMR (100 MHz, CDCl<sub>3</sub>) δ: 171.8, 168.1, 149.8, 145.7, 141.0, 139.8, 136.7, 136.3, 134.1, 133.2, 132.8, 132.0, 131.8, 129.7, 129.4, 128.5, 127.4, 126.6, 126.1, 125.6, 124.6, 124.0, 116.9, 80.8, 53.8, 51.2, 21.4; HRMS (ESI): *m/z* calcd for C<sub>27</sub>H<sub>21</sub>N<sub>2</sub>O<sub>3</sub><sup>+</sup> [M+H]<sup>+</sup> 421.1547. Found 421.1548.

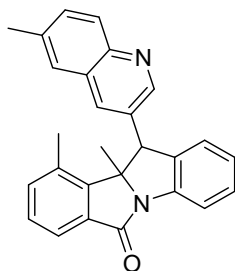

**(3p) 10,10b-dimethyl-11-(6-methylquinolin-3-yl)-10b,11-dihydro-6H-isoindolo[2,1-a]indol-6-one.**

Purified by chromatography on silica gel, eluting with ethyl acetate/petroleum ether 1:1 (v/v); brown solid, m.p. = 87-89 °C; 18.3 mg, 47% yield. <sup>1</sup>H NMR (400 MHz, CDCl<sub>3</sub>) δ: 8.44 (s, 1H), 7.89 (d, *J* = 8.0 Hz, 1H), 7.76 (d, *J* = 8.0 Hz, 1H), 7.64 (d, *J* = 4.0 Hz, 1H), 7.43-7.36 (m, 2H), 7.19 (s, 1H), 7.15 (t, *J* = 8.0 Hz, 2H), 7.09 (t, *J* = 8.0 Hz, 1H), 7.01 (d, *J* = 8.0 Hz, 2H), 4.58 (s, 1H), 2.38 (s, 3H), 2.28 (s, 3H), 1.87 (s, 3H). <sup>13</sup>C NMR (100 MHz, CDCl<sub>3</sub>) δ: 167.4, 148.9, 145.7, 145.6, 139.2, 138.0, 136.6, 134.5, 133.8, 133.6, 133.4, 132.2, 131.6, 129.1, 129.0, 128.5, 127.5, 126.5, 126.3, 125.2, 122.4, 117.3, 76.2, 54.0, 26.5, 21.4, 19.0. HRMS (ESI): *m/z* calcd for C<sub>27</sub>H<sub>23</sub>N<sub>2</sub>O<sup>+</sup> [M+H]<sup>+</sup> 391.1805. Found 391.1806.

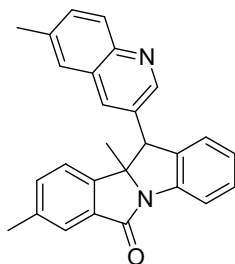

**(3q) 8,10b-dimethyl-11-(6-methylquinolin-3-yl)-10b,11-dihydro-6H-isoindolo[2,1-a]indol-6-one.**

Purified by chromatography on silica gel, eluting with ethyl acetate/petroleum ether 1:1 (v/v); brown solid, m.p. = 113-115 °C; 20.7 mg, 53% yield. <sup>1</sup>H NMR (400 MHz, CDCl<sub>3</sub>) δ: 8.45 (s, 1H), 7.88 (d, *J* = 8.0 Hz, 1H), 7.76 (d, *J* = 12.0 Hz, 1H), 7.47-7.44 (m, 2H), 7.35 (d, *J* = 8.0 Hz, 1H), 7.19-7.13 (m, 3H), 7.06 (s, 2H), 6.87 (s, 1H), 4.56 (s, 1H), 2.37 (s, 3H), 2.19 (s, 3H), 1.81 (s, 3H); <sup>13</sup>C NMR (100 MHz, CDCl<sub>3</sub>) δ: 168.2, 149.7, 145.1, 139.2, 138.5, 137.9, 136.4, 133.6, 133.5, 132.8, 132.1, 132.0, 131.4, 129.1, 128.5, 128.4, 126.6, 126.5, 125.1, 124.7, 122.5, 117.2, 75.8, 54.2, 28.4, 21.3, 21.1; HRMS (ESI): *m/z* calcd for C<sub>27</sub>H<sub>23</sub>N<sub>2</sub>O<sup>+</sup> [M+H]<sup>+</sup> 391.1805. Found 391.1803.

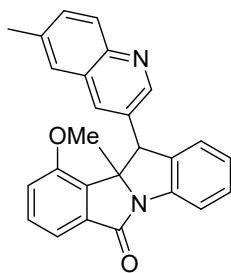

**(3r)10-methoxy-10b-methyl-11-(6-methylquinolin-3-yl)-10b,11-dihydro-6H-isoindolo[2,1-a]indol-6-one.** Purified by chromatography on silica gel, eluting with ethyl acetate/petroleum ether 1:1 (v/v); brown liquid; 30.5 mg, 75% yield. <sup>1</sup>H NMR (400 MHz, CDCl<sub>3</sub>) δ: 8.43 (s, 1H), 7.87 (d, *J* = 8.0 Hz, 1H), 7.76 (d, *J* = 8.0 Hz, 1H), 7.46 (t, *J* = 8.0 Hz, 1H), 7.37 (d, *J* = 8.0 Hz, 1H), 7.20-7.11 (m, 4H), 7.07 (d, *J* = 8.0 Hz, 1H), 6.87 (s, 1H), 6.70 (d, *J* = 8.0 Hz, 1H), 4.55 (s, 1H), 3.68 (s, 3H), 2.38 (s, 3H), 1.81 (s, 3H); <sup>13</sup>C NMR (100 MHz, CDCl<sub>3</sub>) δ: 168.0, 159.9, 149.7, 145.5, 140.2, 139.2, 138.0, 136.5, 134.1, 133.7, 133.5, 131.5, 129.1, 128.5, 127.6, 126.6, 125.3, 123.6, 120.7, 117.3, 107.2, 75.7, 55.4, 54.3, 28.5, 21.4; HRMS (ESI): *m/z* calcd for C<sub>27</sub>H<sub>23</sub>N<sub>2</sub>O<sub>2</sub><sup>+</sup> [M+H]<sup>+</sup> 407.1754. Found 407.1756.

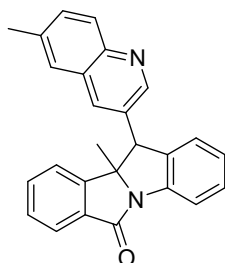

**(5a)10b-methyl-11-(6-methylquinolin-3-yl)-10b,11-dihydro-6H-isoindolo[2,1-a]indol-6-one.** Purified by chromatography on silica gel, eluting with ethyl acetate/petroleum ether 1:1 (v/v); brown solid; m.p. = 209-211 °C; 26.0 mg, 69% yield. <sup>1</sup>H NMR (400 MHz, CDCl<sub>3</sub>) δ: 8.48 (s, 1H), 7.89 (d, *J* = 8.0 Hz, 1H), 7.75 (d, *J* = 8.0 Hz, 1H), 7.65 (d, *J* = 8.0 Hz, 1H), 7.47 (t, *J* = 8.0 Hz, 1H), 7.36 (d, *J* = 12.0 Hz, 1H), 7.24 (s, 1H), 7.18-7.15 (m, 5H), 6.84 (s, 1H), 4.59 (s, 1H), 2.37 (s, 3H), 1.85 (s, 3H); HRMS (ESI): *m/z* calcd for C<sub>26</sub>H<sub>21</sub>N<sub>2</sub>O<sup>+</sup> [M+H]<sup>+</sup> 377.1648. Found 377.1648.

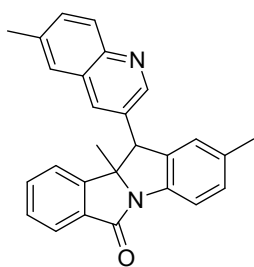

**(5b)2,10b-dimethyl-11-(6-methylquinolin-3-yl)-10b,11-dihydro-6H-isoindolo[2,1-a]indol-6-one.** Purified by chromatography on silica gel, eluting with ethyl acetate/petroleum ether 1:1 (v/v); brown solid; m.p. = 237-239 °C; 23.8 mg, 61% yield. <sup>1</sup>H NMR (400 MHz, CDCl<sub>3</sub>) δ: 8.49 (s, 1H), 7.76 (d, *J* = 8.0 Hz, 2H), 7.64 (d, *J* = 4.0 Hz, 1H), 7.36 (d, *J* = 8.0 Hz, 1H), 7.24 (d, *J* = 8.0 Hz, 2H), 7.19-7.14 (m, 3H), 6.99 (s, 1H), 6.85 (s, 1H), 4.53 (s, 1H), 2.37 (s, 3H), 2.31 (s, 3H), 1.83 (s, 3H); HRMS (ESI): *m/z* calcd for C<sub>27</sub>H<sub>23</sub>N<sub>2</sub>O<sup>+</sup> [M+H]<sup>+</sup> 391.1805. Found 391.1801.

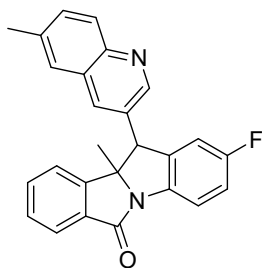

**(5c)2-fluoro-10b-methyl-11-(6-methylquinolin-3-yl)-10b,11-dihydro-6H-isoindolo[2,1-a]indol-6-one.** Purified by chromatography on silica gel, eluting with ethyl acetate/petroleum ether 1:1 (v/v); brown solid, m.p. = 205-207 °C; 22.1 mg, 56% yield. <sup>1</sup>H NMR (400 MHz, CDCl<sub>3</sub>) δ: 8.45 (s, 1H), 7.85-7.81 (m, 1H), 7.76 (d, *J* = 8.0 Hz, 1H), 7.64 (d, *J* = 8.0 Hz, 1H), 7.37 (d, *J* = 8.0 Hz, 1H), 7.24-7.16 (m, 5H), 6.92 (d, *J* = 8.0 Hz, 1H), 6.85 (s, 1H), 4.56 (s, 1H), 2.38 (s, 3H), 1.85 (s, 3H); **HRMS** (ESI): *m/z* calcd for C<sub>26</sub>H<sub>20</sub>FN<sub>2</sub>O<sup>+</sup> [M+H]<sup>+</sup> 395.1554. Found 395.1553.

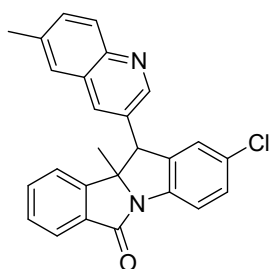

**(5d)2-chloro-10b-methyl-11-(6-methylquinolin-3-yl)-10b,11-dihydro-6H-isoindolo[2,1-a]indol-6-one.** Purified by chromatography on silica gel, eluting with ethyl acetate/petroleum ether 1:1 (v/v); brown solid, m.p. = 157-159 °C; 29.6 mg, 72% yield. <sup>1</sup>H NMR (400 MHz, CDCl<sub>3</sub>) δ: 8.44 (s, 1H), 7.81 (d, *J* = 8.0 Hz, 1H), 7.76 (d, *J* = 8.0 Hz, 1H), 7.65 (d, *J* = 8.0 Hz, 1H), 7.44 (d, *J* = 8.0 Hz, 1H), 7.38 (d, *J* = 8.0 Hz, 1H), 7.24-7.15 (m, 5H), 6.86 (s, 1H), 4.56 (s, 1H), 2.38 (s, 3H), 1.84 (s, 3H); **HRMS** (ESI): *m/z* calcd for C<sub>26</sub>H<sub>20</sub>ClN<sub>2</sub>O<sup>+</sup> [M+H]<sup>+</sup> 411.1259. Found 411.1255.

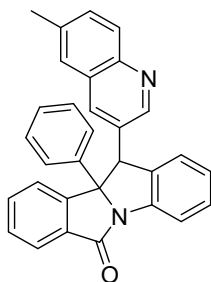

**(5e)11-(6-methylquinolin-3-yl)-10b-phenyl-10b,11-dihydro-6H-isoindolo[2,1-a]indol-6-one.** Purified by chromatography on silica gel, eluting with ethyl acetate/petroleum ether 1:1 (v/v); brown solid, m.p. = 249-251 °C; 24.1 mg, 55% yield. <sup>1</sup>H NMR (400 MHz, CDCl<sub>3</sub>) δ: 8.69(s, 1H), 8.00 (d, *J* = 8.0 Hz, 1H), 7.79 (d, *J* = 8.0 Hz, 3H), 7.61 (d, *J* = 8.0 Hz, 1H), 7.46 (t, *J* = 8.0 Hz, 1H), 7.39-7.36 (m, 3H), 7.31-7.28 (m, 2H), 7.22 (s, 1H), 7.18-7.08(m, 4H), 6.99 (s, 1H), 5.23 (s, 1H), 2.38 (s, 3H); **HRMS** (ESI): *m/z* calcd for C<sub>31</sub>H<sub>23</sub>N<sub>2</sub>O<sup>+</sup> [M+H]<sup>+</sup> 439.1805. Found 439.1804.

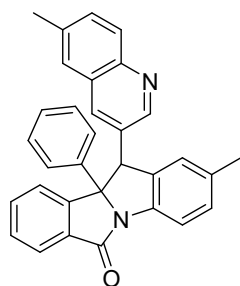

**(5f)2-methyl-11-(6-methylquinolin-3-yl)-10b-phenyl-10b,11-dihydro-6H-isoindolo[2,1-a]indol-6-one.** Purified by chromatography on silica gel, eluting with ethyl acetate/petroleum ether 1:1 (v/v); brown solid, m.p. = 121-123 °C; 20.8 mg, 46% yield.  $^1\text{H NMR}$  (400 MHz,  $\text{CDCl}_3$ )  $\delta$ : 8.67 (s, 1H), 7.87 (d,  $J = 8.0$  Hz, 1H), 7.78 (d,  $J = 8.0$  Hz, 2H), 7.65 (d,  $J = 8.0$  Hz, 2H), 7.59 (d,  $J = 8.0$  Hz, 1H), 7.37 (t,  $J = 8.0$  Hz, 3H), 7.29 (d,  $J = 4.0$  Hz, 2H), 7.24 (s, 2H), 7.15 (t,  $J = 8.0$  Hz, 1H), 7.09-7.06 (m, 1H), 7.00 (s, 1H), 6.89 (s, 1H), 5.17 (s, 1H), 2.39 (s, 3H), 2.25 (s, 3H);  $^{13}\text{C NMR}$  (100 MHz,  $\text{CDCl}_3$ )  $\delta$ : 168.7, 149.8, 147.1, 145.5, 143.2, 137.8, 137.5, 136.7, 135.5, 134.1, 133.3, 132.6, 132.2, 131.7, 129.8, 129.0, 128.4, 128.4, 128.1, 127.6, 126.8, 126.6, 125.0, 124.4, 123.8, 116.9, 81.4, 56.1, 21.4, 21.2; **HRMS** (ESI): m/z calcd for  $\text{C}_{32}\text{H}_{25}\text{N}_2\text{O}^+$   $[\text{M}+\text{H}]^+$  453.1961. Found 453.1963.

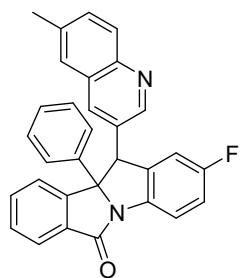

**(5g)2-fluoro-11-(6-methylquinolin-3-yl)-10b-phenyl-10b,11-dihydro-6H-isoindolo[2,1-a]indol-6-one.** Purified by chromatography on silica gel, eluting with ethyl acetate/petroleum ether 1:1 (v/v); brown solid, m.p. = 108-110 °C; 23.3 mg, 51% yield.  $^1\text{H NMR}$  (400 MHz,  $\text{CDCl}_3$ )  $\delta$ : 8.67 (s, 1H), 7.96-7.93 (m, 1H), 7.81-7.76 (m, 3H), 7.60 (d,  $J = 8.0$  Hz, 1H), 7.41-7.38 (m, 3H), 7.30 (t,  $J = 8.0$  Hz, 3H), 7.19-7.13 (m, 2H), 7.11-7.08 (m, 1H), 7.00 (s, 1H), 6.82 (d,  $J = 8.0$  Hz, 1H), 5.21 (s, 1H), 2.40 (s, 3H); **HRMS** (ESI): m/z calcd for  $\text{C}_{31}\text{H}_{22}\text{FN}_2\text{O}^+$   $[\text{M}+\text{H}]^+$  457.1711. Found 457.1707.

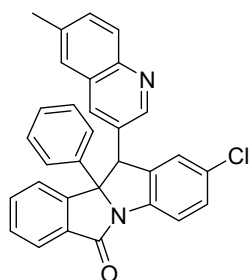

**(5h)2-chloro-11-(6-methylquinolin-3-yl)-10b-phenyl-10b,11-dihydro-6H-isoindolo[2,1-a]indol-6-one.** Purified by chromatography on silica gel, eluting with ethyl acetate/petroleum ether 1:1 (v/v); brown solid, m.p. = 94-96 °C; 24.1 mg, 51% yield.  $^1\text{H NMR}$  (400 MHz,  $\text{CDCl}_3$ )  $\delta$ : 8.67(s, 1H), 7.96-7.93 (m, 1H), 7.81-7.76 (m, 3H), 7.60 (d,  $J = 8.0$  Hz, 1H), 7.41-7.38 (m, 3H), 7.30 (t,  $J = 8.0$  Hz, 3H), 7.18-7.13 (m, 2H), 7.11-7.08(m, 1H), 7.00 (s, 1H), 6.82 (d,  $J = 8.0$  Hz, 1H), 5.21 (s, 1H), 2.40 (s, 3H); **HRMS** (ESI): m/z calcd for  $\text{C}_{31}\text{H}_{22}\text{ClN}_2\text{O}^+$   $[\text{M}+\text{H}]^+$  473.1415. Found 473.1413.

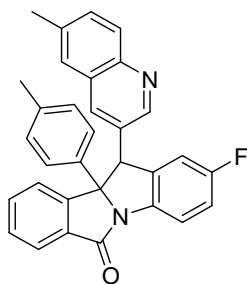

**(5i)2-fluoro-11-(6-methylquinolin-3-yl)-10b-(p-tolyl)-10b,11-dihydro-6H-isoindolo[2,1-a]indol-6-one.** Purified by chromatography on silica gel, eluting with ethyl acetate/petroleum ether 1:1 (v/v); brown solid, m.p. = 203-205 °C; 25.9 mg, 55% yield. <sup>1</sup>H NMR (400 MHz, CDCl<sub>3</sub>) δ: 8.65(s, 1H), 7.94-7.91 (m, 1H), 7.79 (d, *J* = 8.0 Hz, 1H), 7.64 (d, *J* = 8.0 Hz, 2H), 7.60 (d, *J* = 4.0 Hz, 1H), 7.40 (d, *J* = 8.0 Hz, 1H), 7.28-7.26 (m, 3H), 7.20 (d, *J* = 8.0 Hz, 2H), 7.16 (d, *J* = 8.0 Hz, 1H), 7.10-7.07(m, 1H), 6.99(s, 1H), 6.82 (d, *J* = 8.0 Hz, 1H), 5.18 (s, 1H), 2.40 (s, 3H), 2.31 (s, 3H); **HRMS** (ESI): *m/z* calcd for C<sub>32</sub>H<sub>24</sub>FN<sub>2</sub>O<sup>+</sup> [M+H]<sup>+</sup> 471.1867. Found 471.1866.

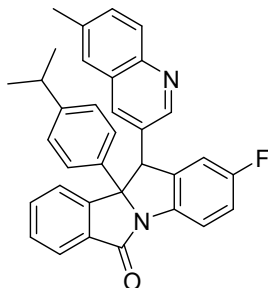

**(5j)2-fluoro-10b-(4-isopropylphenyl)-11-(6-methylquinolin-3-yl)-10b,11-dihydro-6H-isoindolo[2,1-a]indol-6-one.** Purified by chromatography on silica gel, eluting with ethyl acetate/petroleum ether 1:1 (v/v); brown solid, m.p. = 125-127 °C; 25.4 mg, 51% yield. <sup>1</sup>H NMR (400 MHz, CDCl<sub>3</sub>) δ: 8.66 (s, 1H), 7.95-7.92 (m, 1H), 7.79 (d, *J* = 8.0 Hz, 1H), 7.67 (d, *J* = 8.0 Hz, 2H), 7.59 (d, *J* = 8.0 Hz, 1H), 7.39 (d, *J* = 8.0 Hz, 1H), 7.28 (d, *J* = 8.0 Hz, 1H), 7.23 (s, 2H), 7.18-7.13 (m, 3H), 7.08 (t, *J* = 8.0 Hz, 1H), 6.98 (s, 1H), 6.82 (d, *J* = 8.0 Hz, 1H), 5.19 (s, 1H), 2.91-2.84 (m, 1H), 2.39 (s, 3H), 1.21 (s, 3H), 1.20 (s, 3H); <sup>13</sup>C NMR (100 MHz, CDCl<sub>3</sub>) δ: 168.8, 161.8, 159.4, 149.5, 149.0, 147.2, 145.5, 140.0, 139.6, 139.5, 136.9, 136.1, 134.0, 132.7, 132.6, 131.9, 131.8, 128.5, 128.4, 127.5, 127.1, 126.6, 124.9, 124.5, 123.9, 118.2, 118.1, 116.0, 115.8, 113.8, 113.6, 81.6, 56.2, 33.6, 23.8, 21.4; **HRMS** (ESI): *m/z* calcd for C<sub>34</sub>H<sub>28</sub>FN<sub>2</sub>O<sup>+</sup> [M+H]<sup>+</sup> 499.2180. Found 499.2183.

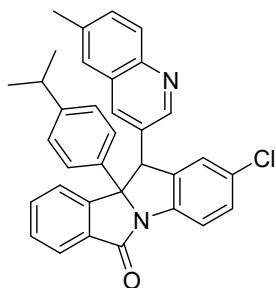

**(5k)2-chloro-10b-(4-isopropylphenyl)-11-(6-methylquinolin-3-yl)-10b,11-dihydro-6H-isoindolo[2,1-a]indol-6-one.** Purified by chromatography on silica gel, eluting with ethyl acetate/petroleum ether 1:1 (v/v); brown solid, m.p. = 239-241 °C; 26.7 mg, 52% yield. <sup>1</sup>H NMR (400 MHz, CDCl<sub>3</sub>) δ: 8.68 (s, 1H), 8.00 (s, 1H), 7.79 (d, *J* = 8.0 Hz, 1H), 7.65 (d, *J* = 8.0 Hz, 2H), 7.60 (d, *J* = 8.0 Hz, 1H), 7.39 (d, *J* = 8.0 Hz, 1H), 7.29-7.25 (m, 2H), 7.23 (s, 2H), 7.16 (t, *J* = 8.0 Hz, 1H), 7.10-

7.06 (m, 2H), 7.00 (d,  $J = 8.0$  Hz, 1H), 6.96 (s, 1H), 5.18 (s, 1H), 2.90-2.83 (m, 1H), 2.39 (s, 3H), 1.21 (s, 3H), 1.19 (s, 3H);  $^{13}\text{C}$  NMR (100 MHz,  $\text{CDCl}_3$ )  $\delta$ : 168.6, 149.6, 149.0, 147.3, 145.6, 140.9, 140.0, 136.8, 136.2, 134.8, 133.9, 132.9, 132.9, 131.8, 131.6, 128.5, 128.5, 127.5, 127.1, 127.0, 126.6, 125.7, 124.9, 124.6, 123.9, 117.6, 81.6, 55.7, 33.6, 23.8, 21.4; HRMS (ESI):  $m/z$  calcd for  $\text{C}_{34}\text{H}_{28}\text{ClN}_2\text{O}^+$   $[\text{M}+\text{H}]^+$  515.1885. Found 515.1886.

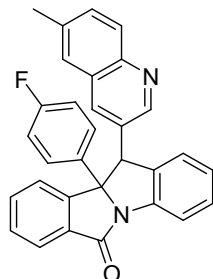

**(5l)10b-(4-fluorophenyl)-11-(6-methylquinolin-3-yl)-10b,11-dihydro-6H-isoindolo[2,1-a]indol-6-one.** Purified by chromatography on silica gel, eluting with ethyl acetate/petroleum ether 1:1 (v/v); brown solid, m.p. = 258-260 °C; 25.1 mg, 55% yield.  $^1\text{H}$  NMR (400 MHz,  $\text{CDCl}_3$ )  $\delta$ : 8.64 (s, 1H), 7.99 (d,  $J = 8.0$  Hz, 1H), 7.79-7.73 (m, 3H), 7.61 (d,  $J = 8.0$  Hz, 1H), 7.47 (t,  $J = 8.0$  Hz, 1H), 7.39 (d,  $J = 12.0$  Hz, 1H), 7.25-7.20 (m, 2H), 7.16 (t,  $J = 8.0$  Hz, 1H), 7.12-7.04 (m, 5H), 6.97 (s, 1H), 5.17 (s, 1H), 2.38 (s, 3H); HRMS (ESI):  $m/z$  calcd for  $\text{C}_{31}\text{H}_{22}\text{FN}_2\text{O}^+$   $[\text{M}+\text{H}]^+$  457.1711. Found 457.1714.

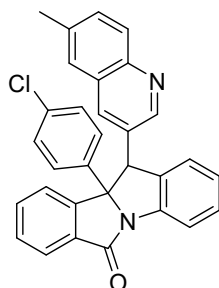

**(5m)10b-(4-chlorophenyl)-11-(6-methylquinolin-3-yl)-10b,11-dihydro-6H-isoindolo[2,1-a]indol-6-one.** Purified by chromatography on silica gel, eluting with ethyl acetate/petroleum ether 1:1 (v/v); brown solid, m.p. = 241-243 °C; 25.5 mg, 54% yield.  $^1\text{H}$  NMR (400 MHz,  $\text{CDCl}_3$ )  $\delta$ : 8.63 (s, 1H), 7.99 (d,  $J = 8.0$  Hz, 1H), 7.78 (d,  $J = 12.0$  Hz, 1H), 7.72 (d,  $J = 8.0$  Hz, 1H), 7.47 (t,  $J = 8.0$  Hz, 2H), 7.39 (d,  $J = 12.0$  Hz, 1H), 7.35 (d,  $J = 8.0$  Hz, 2H), 7.22 (s, 1H), 7.18 (t,  $J = 8.0$  Hz, 2H), 7.14-7.09 (m, 3H), 6.97 (s, 1H), 5.15 (s, 1H), 2.39 (s, 3H);  $^{13}\text{C}$  NMR (100 MHz,  $\text{CDCl}_3$ )  $\delta$ : 168.6, 149.6, 146.7, 145.6, 141.7, 139.7, 137.3, 136.8, 134.1, 134.1, 132.8, 132.0, 131.8, 129.4, 129.2, 128.7, 128.5, 127.5, 126.6, 126.5, 126.2, 125.8, 124.6, 123.7, 117.3, 80.8, 56.1, 21.4; HRMS (ESI):  $m/z$  calcd for  $\text{C}_{31}\text{H}_{22}\text{ClN}_2\text{O}^+$   $[\text{M}+\text{H}]^+$  473.1415. Found 473.1413.

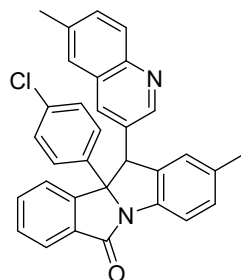

**(5n)10b-(4-chlorophenyl)-2-methyl-11-(6-methylquinolin-3-yl)-10b,11-dihydro-6H-isoindolo[2,1-a]indol-6-one.** Purified by chromatography on silica gel, eluting with ethyl acetate/petroleum ether 1:1 (v/v); brown solid, m.p. = 224-226 °C; 23.3 mg, 48% yield.  $^1\text{H}$  NMR (400 MHz,  $\text{CDCl}_3$ )  $\delta$ : 8.64 (s,

1H), 7.86 (d,  $J = 8.0$  Hz, 1H), 7.79 (d,  $J = 8.0$  Hz, 1H), 7.71 (d,  $J = 8.0$  Hz, 2H), 7.60 (d,  $J = 8.0$  Hz, 1H), 7.39 (d,  $J = 8.0$  Hz, 1H), 7.34 (d,  $J = 8.0$  Hz, 2H), 7.28 (s, 1H), 7.24 (s, 2H), 7.18-7.15 (m, 1H), 7.10 (t,  $J = 8.0$  Hz, 1H), 7.00 (s, 1H), 6.90 (s, 1H), 5.10 (s, 1H), 2.39 (s, 3H), 2.26 (s, 3H); **HRMS** (ESI):  $m/z$  calcd for  $C_{32}H_{24}ClN_2O^+$   $[M+H]^+$  487.1572. Found 487.1573.

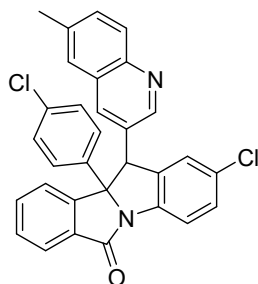

**(5o)2-chloro-10b-(4-chlorophenyl)-11-(6-methylquinolin-3-yl)-10b,11-dihydro-6H-isoindolo[2,1-a]indol-6-one.** Purified by chromatography on silica gel, eluting with ethyl acetate/petroleum ether 1:1 (v/v); brown solid, m.p. = 224-226 °C; 24.3 mg, 48% yield.  **$^1H$  NMR** (400 MHz,  $CDCl_3$ )  $\delta$ : 8.63 (s, 1H), 7.95-7.91 (m, 1H), 7.80 (d,  $J = 12.0$  Hz, 1H), 7.70 (d,  $J = 8.0$  Hz, 2H), 7.61 (d,  $J = 8.0$  Hz, 1H), 7.41 (d,  $J = 8.0$  Hz, 1H), 7.37 (d,  $J = 12.0$  Hz, 2H), 7.24-7.15 (m, 4H), 7.12 (t,  $J = 8.0$  Hz, 1H), 6.99 (s, 1H), 6.83 (d,  $J = 8.0$  Hz, 1H), 5.13 (s, 1H), 2.41 (s, 3H);  **$^{13}C$  NMR** (100 MHz,  $CDCl_3$ )  $\delta$ : 168.7, 149.4, 146.5, 145.7, 141.3, 139.2, 137.0, 135.9, 134.3, 134.0, 133.0, 132.1, 132.0, 131.8, 129.3, 128.9, 128.5, 127.5, 126.6, 126.5, 124.7, 123.7, 118.3, 118.2, 116.3, 116.1, 113.8, 113.6, 81.3, 56.2, 21.4; **HRMS** (ESI):  $m/z$  calcd for  $C_{31}H_{21}Cl_2N_2O^+$   $[M+H]^+$  507.1025. Found 507.1023.

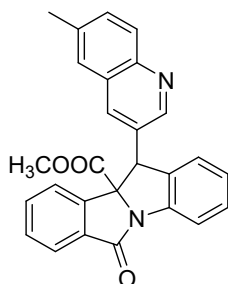

**(5p)methyl 11-(6-methylquinolin-3-yl)-6-oxo-6H-isoindolo[2,1-a]indole-10b(11H)-carboxylate.** Purified by chromatography on silica gel, eluting with ethyl acetate/petroleum ether 1:1 (v/v); brown solid, m.p. = 194-196 °C; 24.4 mg, 58% yield.  **$^1H$  NMR** (400 MHz,  $CDCl_3$ )  $\delta$ : 8.57 (s, 1H), 7.93 (d,  $J = 8.0$  Hz, 1H), 7.78 (d,  $J = 8.0$  Hz, 1H), 7.66 (d,  $J = 8.0$  Hz, 1H), 7.49-7.45 (m, 1H), 7.40-7.34 (m, 2H), 7.24-7.21 (m, 3H), 7.17 (d,  $J = 4.0$  Hz, 2H), 6.97 (s, 1H), 5.45 (s, 1H), 3.75 (s, 3H), 2.39 (s, 3H); **HRMS** (ESI):  $m/z$  calcd for  $C_{27}H_{21}N_2O_3^+$   $[M+H]^+$  421.1547. Found 421.1546.

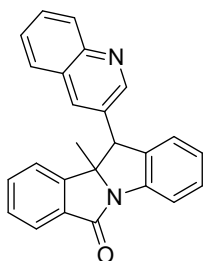

**(6a)10b-methyl-11-(quinolin-3-yl)-10b,11-dihydro-6H-isoindolo[2,1-a]indol-6-one.** Purified by chromatography on silica gel, eluting with ethyl acetate/petroleum ether 1:1 (v/v); brown solid, m.p. = 219-221 °C; 29.0 mg, 80% yield.  **$^1H$  NMR** (400 MHz,  $CDCl_3$ )  $\delta$ : 8.53 (s, 1H), 7.88 (t,  $J = 8.0$  Hz, 2H), 7.65 (d,  $J = 8.0$  Hz, 1H), 7.53 (t,  $J = 8.0$  Hz, 1H), 7.49-7.46 (m, 1H), 7.43 (d,  $J = 8.0$  Hz, 1H), 7.36-

7.33 (m, 1H), 7.24-7.15 (m, 5H), 6.96 (s, 1H), 4.61 (s, 1H), 1.85 (s, 3H);  $^{13}\text{C}$  NMR (100 MHz,  $\text{CDCl}_3$ )  $\delta$ : 168.1, 150.5, 147.8, 146.9, 139.2, 137.8, 134.1, 133.6, 132.7, 132.5, 129.2, 129.2, 128.8, 128.5, 127.7, 127.4, 126.6, 126.6, 125.3, 124.5, 122.8, 117.4, 76.0, 54.3, 28.3; HRMS (ESI):  $m/z$  calcd for  $\text{C}_{25}\text{H}_{19}\text{N}_2\text{O}^+$   $[\text{M}+\text{H}]^+$  363.1492. Found 363.1491.

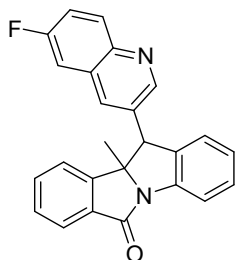

**(6b) 11-(6-fluoroquinolin-3-yl)-10b-methyl-10b,11-dihydro-6H-isoindolo[2,1-a]indol-6-one.**

Purified by chromatography on silica gel, eluting with ethyl acetate/petroleum ether 1:1 (v/v); brown solid, m.p. = 255-257 °C; 23.6 mg, 62% yield.  $^1\text{H}$  NMR (400 MHz,  $\text{CDCl}_3$ )  $\delta$ : 8.47 (s, 1H), 7.89 (d,  $J$  = 8.0 Hz, 1H), 7.85 (t,  $J$  = 4.0 Hz, 1H), 7.66 (d,  $J$  = 8.0 Hz, 1H), 7.48 (t,  $J$  = 8.0 Hz, 1H), 7.33-7.27 (m, 2H), 7.21-7.16 (m, 4H), 7.05 (d,  $J$  = 8.0 Hz, 1H), 6.91 (s, 1H), 4.60 (s, 1H), 1.86 (s, 3H);  $^{13}\text{C}$  NMR (100 MHz,  $\text{CDCl}_3$ )  $\delta$ : 168.0, 159.1, 149.9, 147.7, 144.0, 139.3, 137.5, 134.4, 133.5, 133.4, 132.7, 132.6, 131.4, 131.3, 129.4, 128.6, 126.5, 125.4, 124.6, 122.8, 119.6, 119.4, 117.5, 110.7, 110.5, 76.0, 54.2, 28.3; HRMS (ESI):  $m/z$  calcd for  $\text{C}_{25}\text{H}_{18}\text{FN}_2\text{O}^+$   $[\text{M}+\text{H}]^+$  381.1398. Found 381.1399.

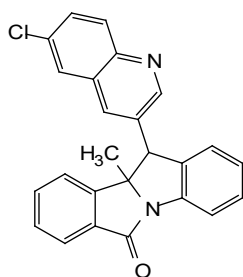

**(6c) 11-(6-chloroquinolin-3-yl)-10b-methyl-10b,11-dihydro-6H-isoindolo[2,1-a]indol-6-one.**

Purified by chromatography on silica gel, eluting with ethyl acetate/petroleum ether 1:1 (v/v); brown solid, m.p. = 159-161 °C; 27.7 mg, 70% yield.  $^1\text{H}$  NMR (400 MHz,  $\text{CDCl}_3$ )  $\delta$ : 8.49 (s, 1H), 7.89 (d,  $J$  = 8.0 Hz, 1H), 7.79 (d,  $J$  = 8.0 Hz, 1H), 7.66 (d,  $J$  = 8.0 Hz, 1H), 7.50-7.45 (m, 2H), 7.43 (s, 1H), 7.29-7.27 (m, 1H), 7.21-7.16 (m, 4H), 6.88 (s, 1H), 4.60 (s, 1H), 1.86 (s, 3H);  $^{13}\text{C}$  NMR (100 MHz,  $\text{CDCl}_3$ )  $\delta$ : 168.0, 150.7, 147.6, 145.2, 139.3, 137.5, 134.6, 133.2, 132.7, 132.6, 132.5, 130.5, 130.2, 129.4, 128.6, 128.1, 126.5, 126.3, 125.4, 124.6, 122.7, 117.5, 76.0, 54.2, 28.2; HRMS (ESI):  $m/z$  calcd for  $\text{C}_{25}\text{H}_{18}\text{ClN}_2\text{O}^+$   $[\text{M}+\text{H}]^+$  397.1102. Found 397.1101.

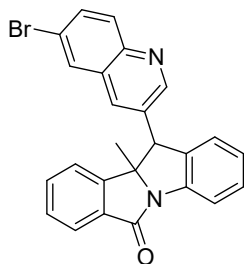

**(6d) 11-(6-bromoquinolin-3-yl)-10b-methyl-10b,11-dihydro-6H-isoindolo[2,1-a]indol-6-one.**

Purified by chromatography on silica gel, eluting with ethyl acetate/petroleum ether 1:1 (v/v); white solid, m.p. = 301-303 °C; 18.0 mg, 41% yield.  $^1\text{H}$  NMR (400 MHz,  $\text{CDCl}_3$ )  $\delta$ : 8.51 (s, 1H), 7.89 (d,  $J$  =



8.0 Hz, 1H), 7.73 (d,  $J = 12.0$  Hz, 1H), 7.67 (d,  $J = 4.0$  Hz, 1H), 7.59 (d,  $J = 8.0$  Hz, 2H), 7.50-7.47 (m, 1H), 7.30-7.27 (m, 1H), 7.21-7.19 (m, 4H), 6.87 (s, 1H), 4.60 (s, 1H), 1.86 (s, 3H);  $^{13}\text{C}$  NMR (100 MHz,  $\text{CDCl}_3$ )  $\delta$ : 168.0, 150.9, 147.6, 145.5, 139.3, 137.5, 134.5, 133.1, 132.7, 132.6, 130.6, 129.7, 129.4, 128.7, 128.6, 126.5, 125.4, 124.7, 122.7, 120.7, 117.5, 76.0, 54.2, 28.2; HRMS (ESI):  $m/z$  calcd for  $\text{C}_{25}\text{H}_{18}\text{BrN}_2\text{O}^+$   $[\text{M}+\text{H}]^+$  441.0597. Found 441.0595.

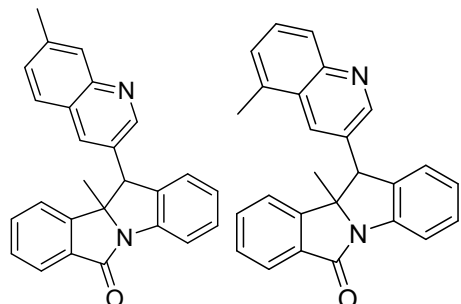

**(6e,6e')10b-methyl-11-(7-methylquinolin-3-yl)-10b,11-dihydro-6H-isoindolo[2,1-a]indol-6-one/10b-methyl-11-(5-methylquinolin-3-yl)-10b,11-dihydro-6H-isoindolo[2,1-a]indol-6-one.**

Purified by chromatography on silica gel, eluting with ethyl acetate/petroleum ether 1:1 (v/v); brown solid, m.p. = 77-79 °C; 31.6 mg, 84% yield (1.38:1).  $^1\text{H}$  NMR (400 MHz,  $\text{CDCl}_3$ )  $\delta$ : 8.49 (d,  $J = 8.0$  Hz, 1H), 7.89 (d,  $J = 8.0$  Hz, 1H), 7.70 (t,  $J = 8.0$  Hz, 1H), 7.67-7.64 (m, 1H), 7.48-7.45 (m, 1H), 7.41 (t,  $J = 8.0$  Hz, 1H), 7.31 (d,  $J = 8.0$  Hz, 0.54H), 7.23-7.13 (m, 6H), 6.89 (s, 0.5H), 4.60 (d,  $J = 4.0$  Hz, 1H), 2.44 (s, 1.32H), 2.29 (s, 1.79H), 1.85 (d,  $J = 8.0$  Hz, 3H);  $^{13}\text{C}$  NMR (100 MHz,  $\text{CDCl}_3$ )  $\delta$ : 168.2, 168.1, 150.5, 149.7, 147.9, 147.9, 147.1, 139.6, 139.2, 139.1, 138.2, 137.9, 134.5, 133.8, 133.2, 132.9, 132.8, 132.7, 132.6, 132.5, 130.7, 129.2, 128.9, 128.6, 128.5, 127.8, 127.3, 127.1, 127.1, 126.6, 126.5, 125.3, 124.5, 124.4, 122.8, 122.8, 117.5, 117.4, 76.0, 76.0, 54.5, 54.3, 28.1, 26.9, 21.7, 18.2; HRMS (ESI):  $m/z$  calcd for  $\text{C}_{26}\text{H}_{21}\text{N}_2\text{O}^+$   $[\text{M}+\text{H}]^+$  377.1648. Found 377.1648.

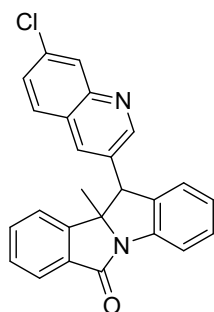

**(6f)11-(7-chloroquinolin-3-yl)-10b-methyl-10b,11-dihydro-6H-isoindolo[2,1-a]indol-6-one.**

Purified by chromatography on silica gel, eluting with ethyl acetate/petroleum ether 1:1 (v/v); brown solid, m.p. = 77-79 °C; 22.6 mg, 57% yield.  $^1\text{H}$  NMR (400 MHz,  $\text{CDCl}_3$ )  $\delta$ : 8.20 (s, 1H), 7.90 (d,  $J = 8.0$  Hz, 1H), 7.78 (d,  $J = 4.0$  Hz, 1H), 7.72 (d,  $J = 8.0$  Hz, 2H), 7.47 (t,  $J = 8.0$  Hz, 3H), 7.23-7.10 (m, 5H), 4.63 (s, 1H), 1.87 (s, 3H).  $^{13}\text{C}$  NMR (100 MHz,  $\text{CDCl}_3$ )  $\delta$ : 167.9, 150.8, 147.8, 147.4, 139.2, 137.5, 134.7, 132.9, 132.6, 131.1, 130.9, 129.4, 128.9, 128.6, 128.2, 126.8, 126.5, 125.5, 125.3, 124.8, 122.8, 117.5, 75.8, 54.7, 28.5. HRMS (ESI):  $m/z$  calcd for  $\text{C}_{25}\text{H}_{18}\text{ClN}_2\text{O}^+$   $[\text{M}+\text{H}]^+$  397.1102. Found 397.1104.

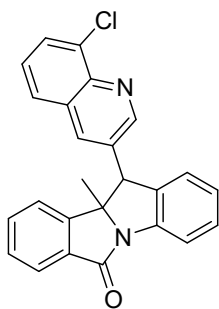

**(6g)11-(8-chloroquinolin-3-yl)-10b-methyl-10b,11-dihydro-6H-isoindolo[2,1-a]indol-6-one.**

Purified by chromatography on silica gel, eluting with ethyl acetate/petroleum ether 1:1 (v/v); brown solid, m.p. = 255-257 °C; 21.4 mg, 54% yield. <sup>1</sup>H NMR (400 MHz, CDCl<sub>3</sub>) δ: 8.70 (s, 1H), 7.90 (d, *J* = 8.0 Hz, 1H), 7.65 (d, *J* = 8.0 Hz, 2H), 7.50-7.46 (m, 1H), 7.35 (d, *J* = 8.0 Hz, 1H), 7.30-7.27 (m, 1H), 7.20-7.17 (m, 4H), 6.94 (s, 1H), 4.64 (s, 1H), 1.87 (s, 3H); <sup>13</sup>C NMR (100 MHz, CDCl<sub>3</sub>) δ: 168.0, 151.2, 147.6, 143.2, 139.2, 137.6, 134.7, 134.6, 133.0, 132.7, 132.7, 129.4, 128.9, 128.6, 126.9, 126.6, 126.5, 125.4, 124.6, 122.8, 117.5, 76.0, 54.0, 28.3; HRMS (ESI): *m/z* calcd for C<sub>25</sub>H<sub>18</sub>ClN<sub>2</sub>O<sup>+</sup> [M+H]<sup>+</sup> 397.1102. Found 397.1104.

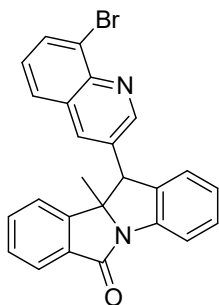

**(6h)11-(8-bromoquinolin-3-yl)-10b-methyl-10b,11-dihydro-6H-isoindolo[2,1-a]indol-6-one.**

Purified by chromatography on silica gel, eluting with ethyl acetate/petroleum ether 1:1 (v/v); white solid, m.p. = 260-262 °C; 19.8 mg, 45% yield. <sup>1</sup>H NMR (400 MHz, CDCl<sub>3</sub>) δ: 8.69 (s, 1H), 7.88 (t, *J* = 8.0 Hz, 2H), 7.66 (d, *J* = 8.0 Hz, 1H), 7.50-7.46 (m, 1H), 7.40 (d, *J* = 12.0 Hz, 1H), 7.30-7.28 (m, 1H), 7.23-7.17 (m, 5H), 6.93 (s, 1H), 4.64 (s, 1H), 1.86 (s, 3H); <sup>13</sup>C NMR (100 MHz, CDCl<sub>3</sub>) δ: 168.0, 151.4, 147.6, 144.0, 139.2, 137.6, 134.8, 134.7, 133.0, 132.8, 129.4, 128.9, 128.7, 127.7, 127.1, 126.5, 125.4, 124.6, 124.2, 122.8, 117.5, 76.0, 54.0, 28.4; HRMS (ESI): *m/z* calcd for C<sub>25</sub>H<sub>18</sub>BrN<sub>2</sub>O<sup>+</sup> [M+H]<sup>+</sup> 441.0597. Found 441.0599.

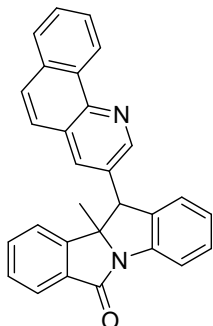

**(6i)11-(benzo[h]quinolin-3-yl)-10b-methyl-10b,11-dihydro-6H-isoindolo[2,1-a]indol-6-one.**

Purified by chromatography on silica gel, eluting with ethyl acetate/petroleum ether 1:1 (v/v); brown solid, m.p. = 230-232 °C; 26.0 mg, 63% yield. <sup>1</sup>H NMR (400 MHz, CDCl<sub>3</sub>) δ: 9.08 (d, *J* = 8.0 Hz, 1H), 8.60 (s, 1H), 7.91 (d, *J* = 8.0 Hz, 1H), 7.78 (d, *J* = 8.0 Hz, 1H), 7.67-7.60 (m, 4H), 7.48 (t, *J* = 8.0 Hz,

1H), 7.28 (d,  $J = 8.0$  Hz, 1H), 7.21-7.11 (m, 5H), 6.99 (s, 1H), 4.65 (s, 1H), 1.86 (s, 3H);  $^{13}\text{C}$  NMR (100 MHz,  $\text{CDCl}_3$ )  $\delta$ : 168.2, 148.4, 148.0, 145.1, 139.3, 138.0, 134.5, 134.2, 133.4, 132.8, 132.6, 130.9, 129.2, 128.5, 128.2, 127.9, 127.7, 127.0, 126.6, 125.9, 125.3, 125.2, 124.5, 124.2, 122.8, 117.4, 76.0, 54.3, 28.4; HRMS (ESI):  $m/z$  calcd for  $\text{C}_{29}\text{H}_{21}\text{N}_2\text{O}^+$   $[\text{M}+\text{H}]^+$  413.1648. Found 413.1647.

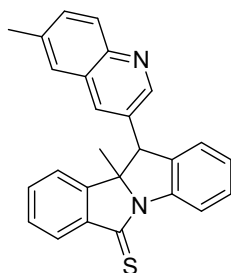

**(7)10b-methyl-11-(6-methylquinolin-3-yl)-10b,11-dihydro-6H-isoindolo[2,1-a]indole-6-thione.**

Purified by chromatography on silica gel, eluting with ethyl acetate/petroleum ether 1:2 (v/v); white solid, m.p. = 90-92 °C; 28.6 mg, 73% yield.  $^1\text{H}$  NMR (400 MHz,  $\text{CDCl}_3$ )  $\delta$ : 8.53 (d,  $J = 8.0$  Hz, 2H), 7.88 (d,  $J = 8.0$  Hz, 1H), 7.76 (d,  $J = 8.0$  Hz, 1H), 7.53 (t,  $J = 8.0$  Hz, 1H), 7.36 (d,  $J = 8.0$  Hz, 1H), 7.29 (d,  $J = 8.0$  Hz, 3H), 7.21-7.17 (m, 3H), 6.85 (s, 1H), 4.62 (s, 1H), 2.36 (s, 3H), 1.83 (s, 3H).  $^{13}\text{C}$  NMR (100 MHz,  $\text{CDCl}_3$ )  $\delta$ : 191.8, 149.3, 145.5, 145.0, 141.2, 139.7, 139.2, 136.7, 133.6, 132.9, 132.1, 131.8, 128.8, 128.8, 128.3, 127.6, 126.7, 126.6, 125.8, 121.9, 119.0, 83.7, 53.4, 28.0, 21.4. HRMS (ESI):  $m/z$  calcd for  $\text{C}_{26}\text{H}_{21}\text{N}_2\text{S}^+$   $[\text{M}+\text{H}]^+$  393.1420. Found 393.1421.

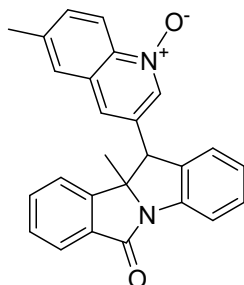

**(8)6-methyl-3-(10b-methyl-6-oxo-10b,11-dihydro-6H-isoindolo[2,1-a]indol-11-yl)-114-quinolin-1-olate.** Purified by chromatography on silica gel, eluting with ethyl acetate/petroleum ether 2:1 (v/v); white solid, m.p. = 267-269 °C; 33.3 mg, 85% yield.  $^1\text{H}$  NMR (400 MHz,  $\text{CDCl}_3$ )  $\delta$ : 8.37 (d,  $J = 8.0$  Hz, 1H), 8.22 (s, 1H), 7.89 (d,  $J = 8.0$  Hz, 1H), 7.69 (d,  $J = 8.0$  Hz, 1H), 7.49 (t,  $J = 8.0$  Hz, 1H), 7.39 (d,  $J = 8.0$  Hz, 1H), 7.33 (t,  $J = 8.0$  Hz, 1H), 7.29 (d,  $J = 8.0$  Hz, 1H), 7.24-7.17 (m, 4H), 6.48 (s, 1H), 4.45 (s, 1H), 2.36 (s, 3H), 1.84 (s, 3H).  $^{13}\text{C}$  NMR (100 MHz,  $\text{CDCl}_3$ )  $\delta$ : 167.9, 147.3, 139.1, 139.0, 138.3, 136.7, 134.8, 134.4, 132.7, 132.6, 132.2, 129.6, 129.5, 128.7, 126.8, 126.5, 125.4, 124.6, 123.8, 122.7, 118.9, 117.4, 75.7, 53.9, 28.2, 21.1. HRMS (ESI):  $m/z$  calcd for  $\text{C}_{26}\text{H}_{21}\text{N}_2\text{O}_2$   $[\text{M}+\text{H}]^+$  393.1603. Found 393.1602.

## 7. NMR Charts

**3a-<sup>1</sup>H**

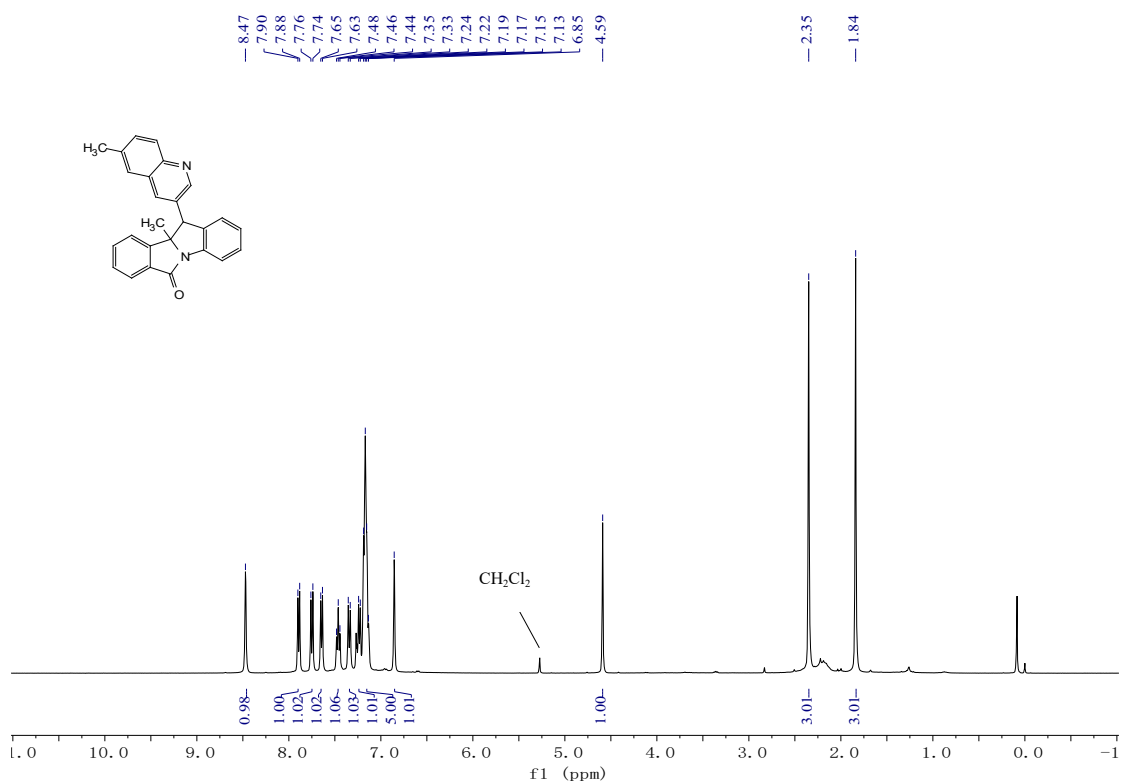

**3a-<sup>13</sup>C**

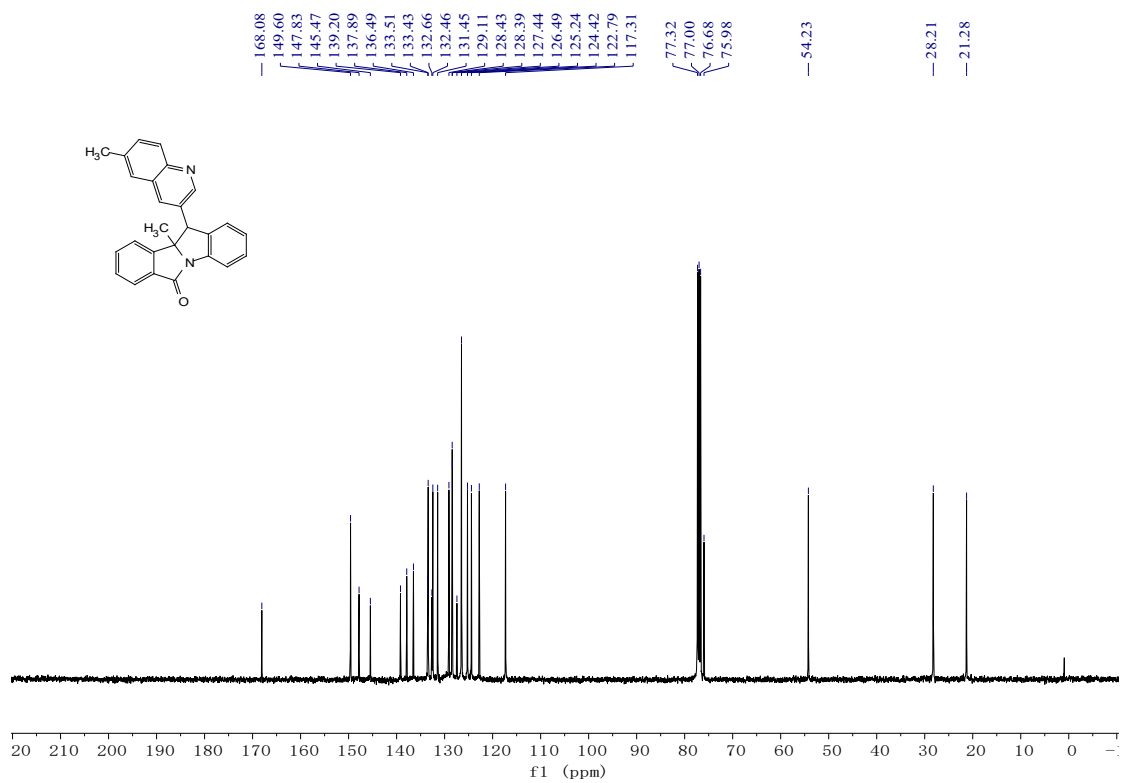

**3b-<sup>1</sup>H**

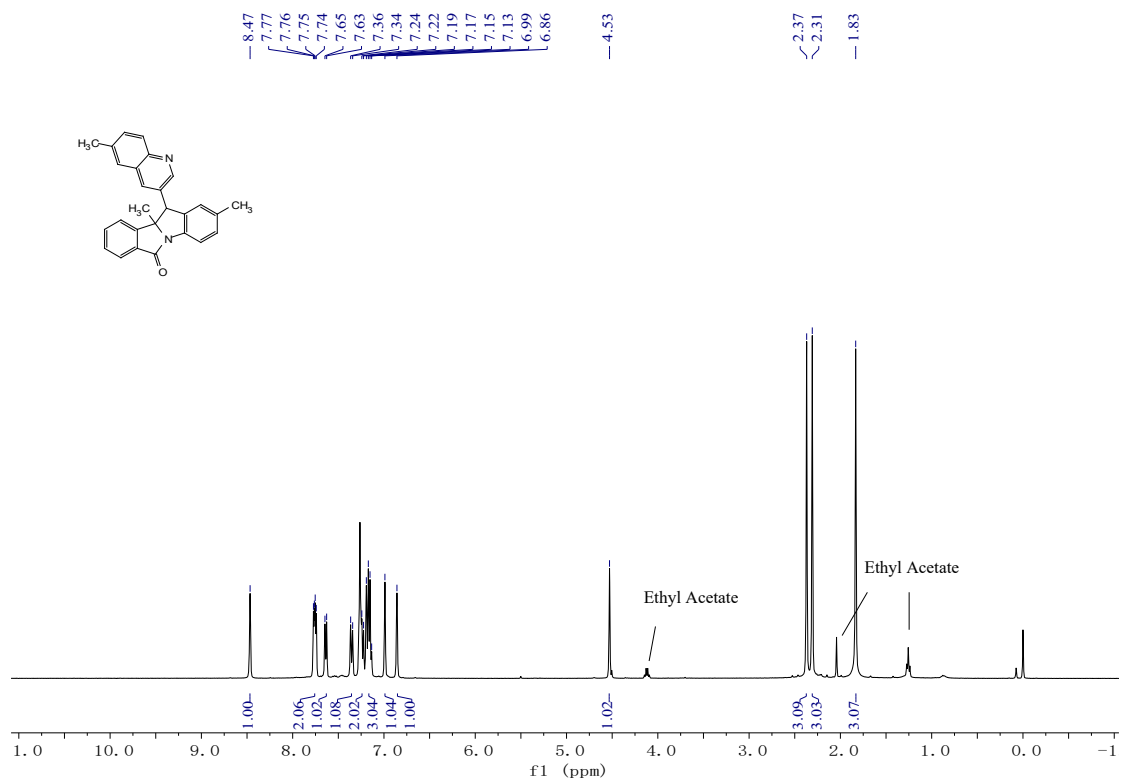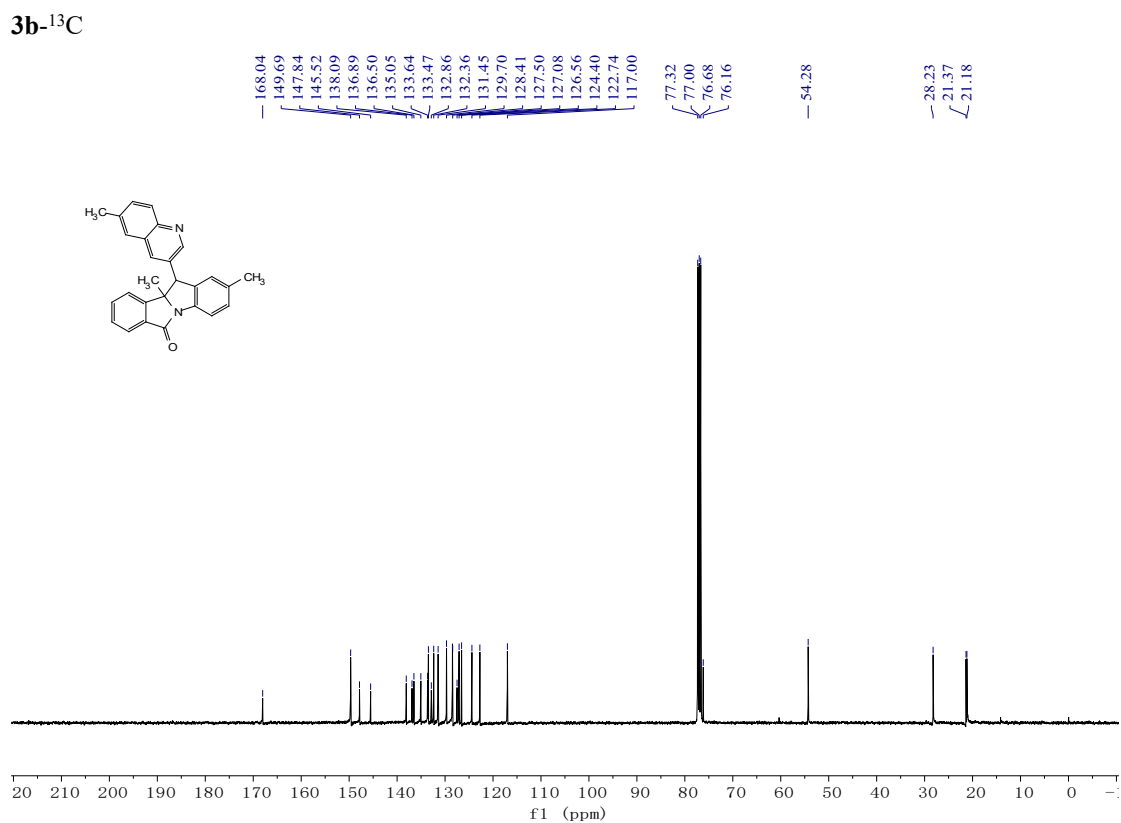

**3c-<sup>1</sup>H**

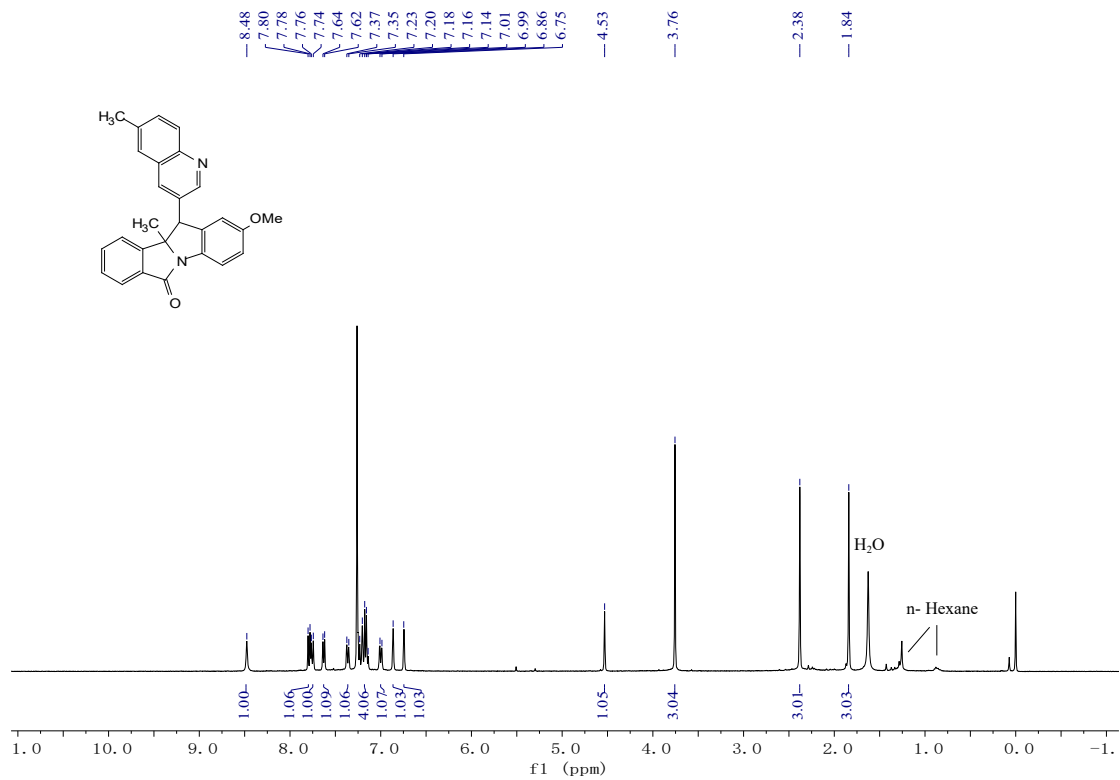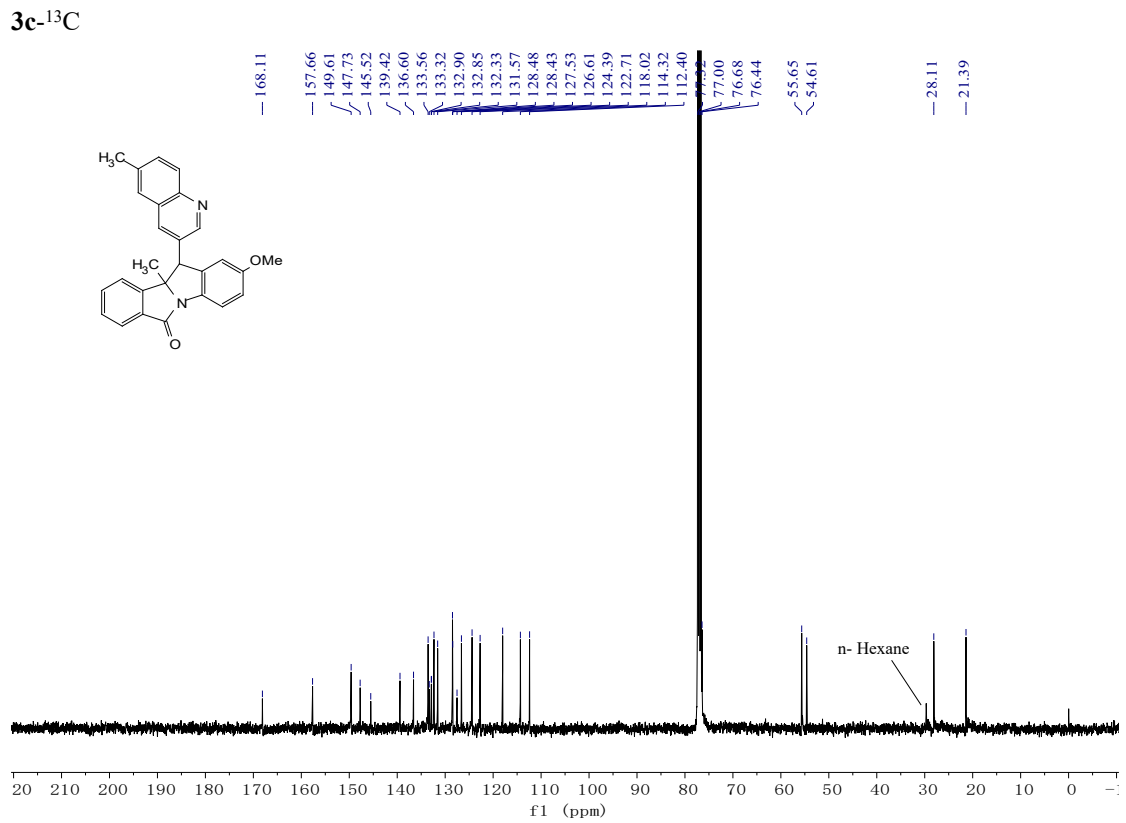

**3d-<sup>1</sup>H**

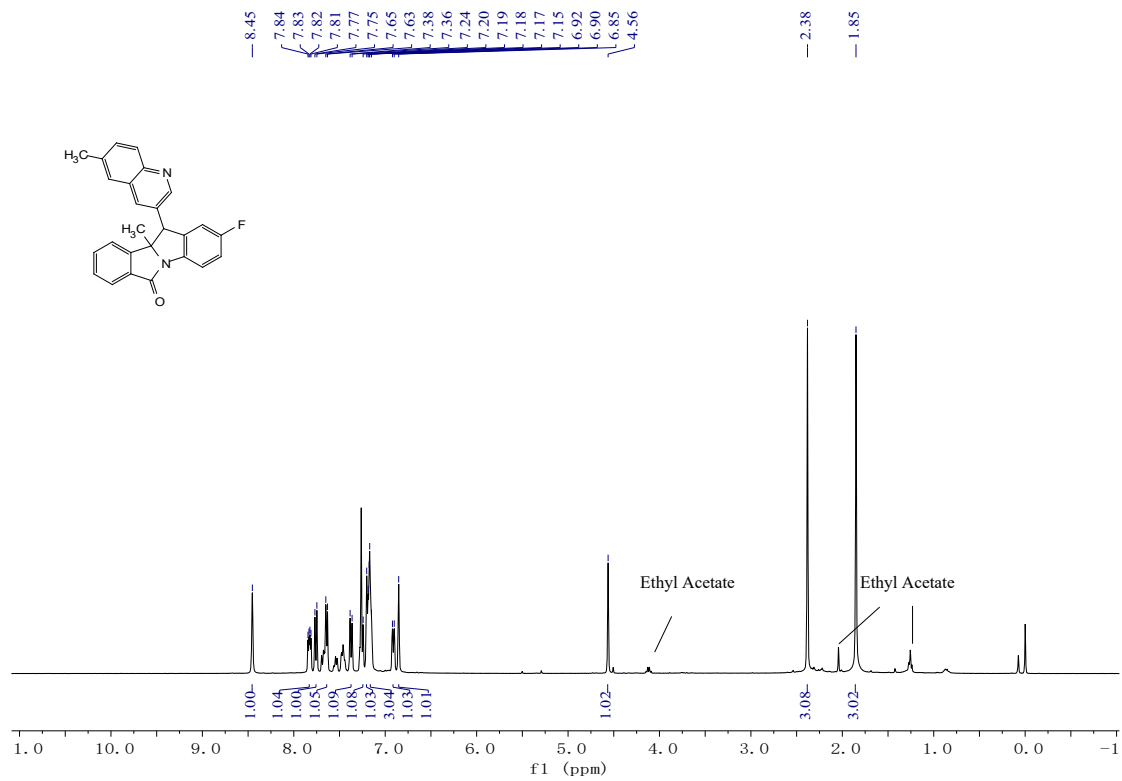

**3d-<sup>13</sup>C**

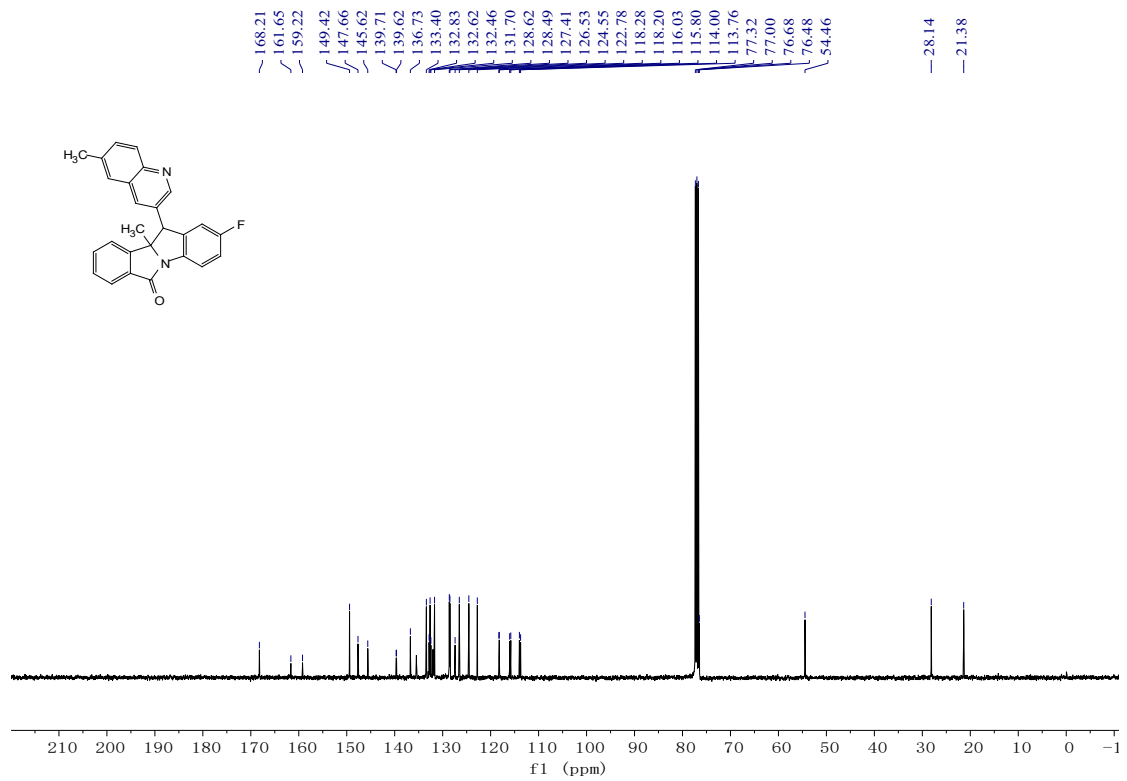

**3e-<sup>1</sup>H**

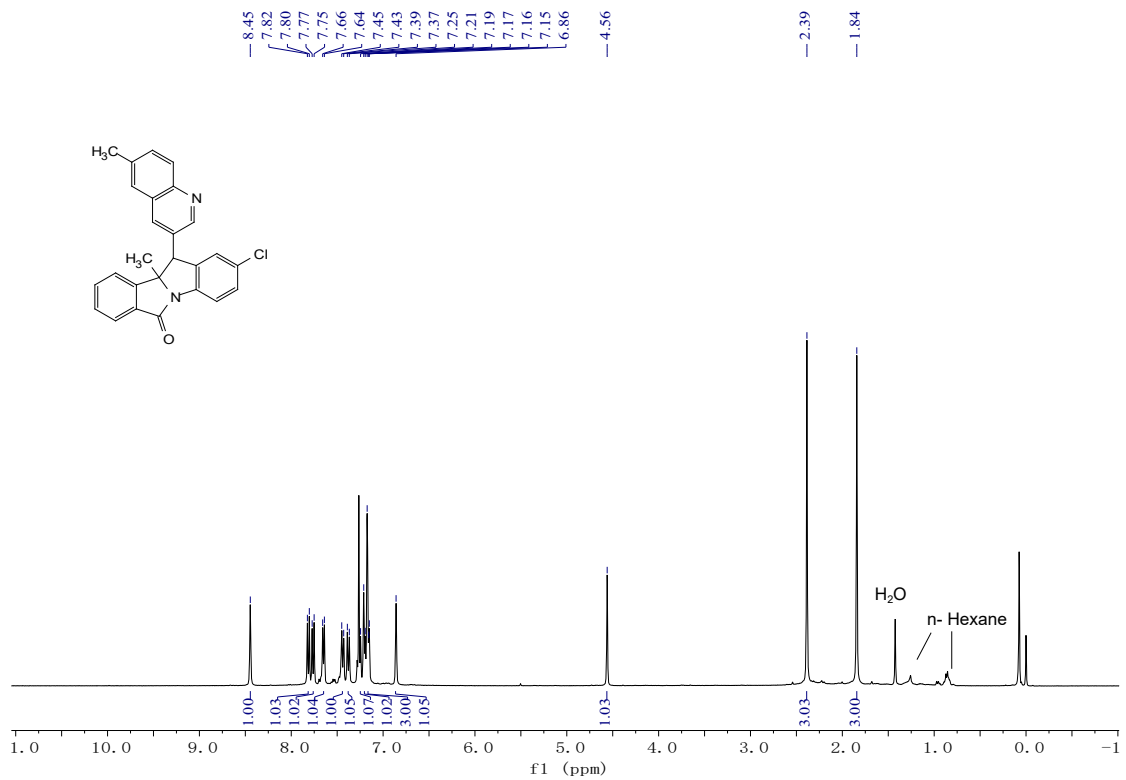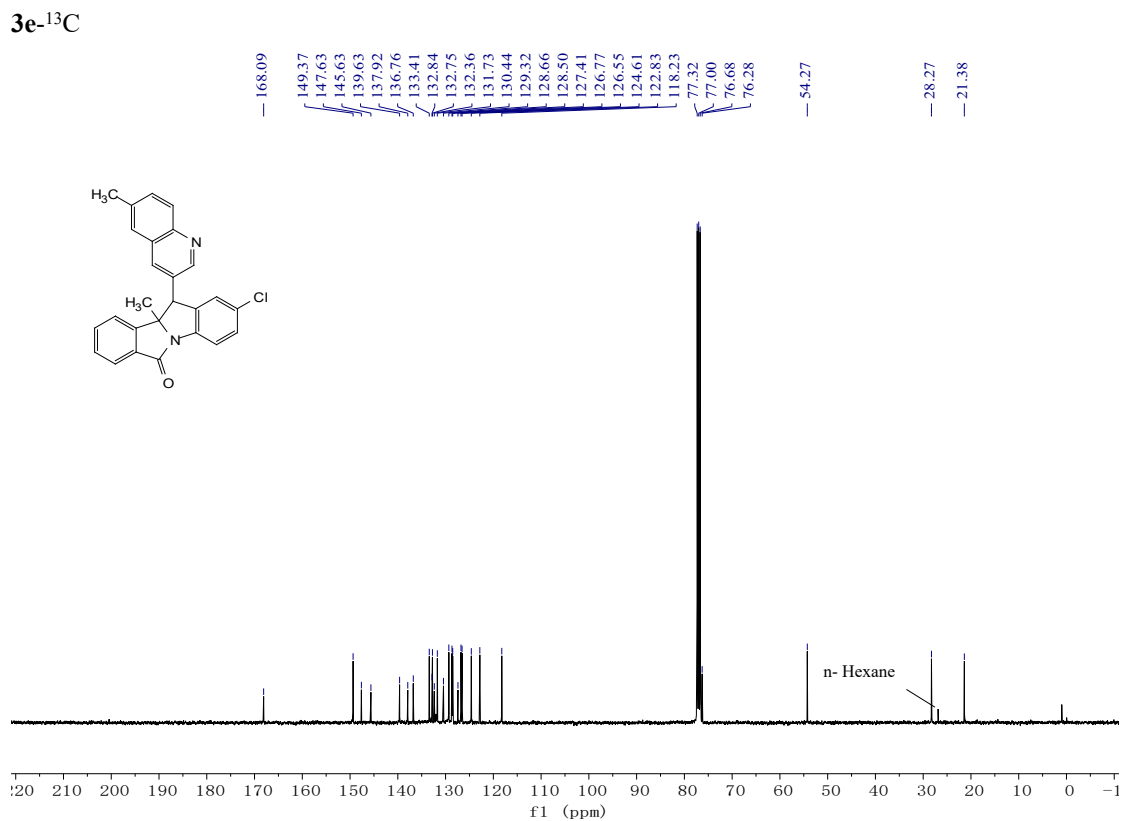

**3f-<sup>1</sup>H**



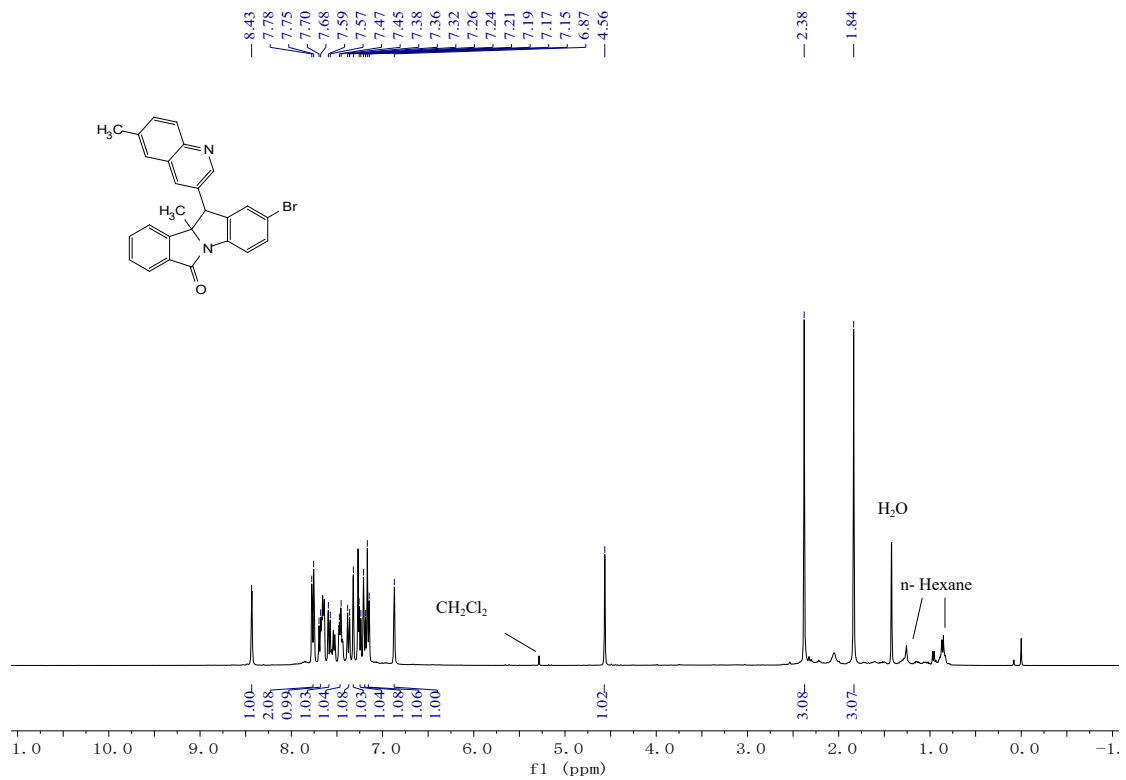

**3f-<sup>13</sup>C**

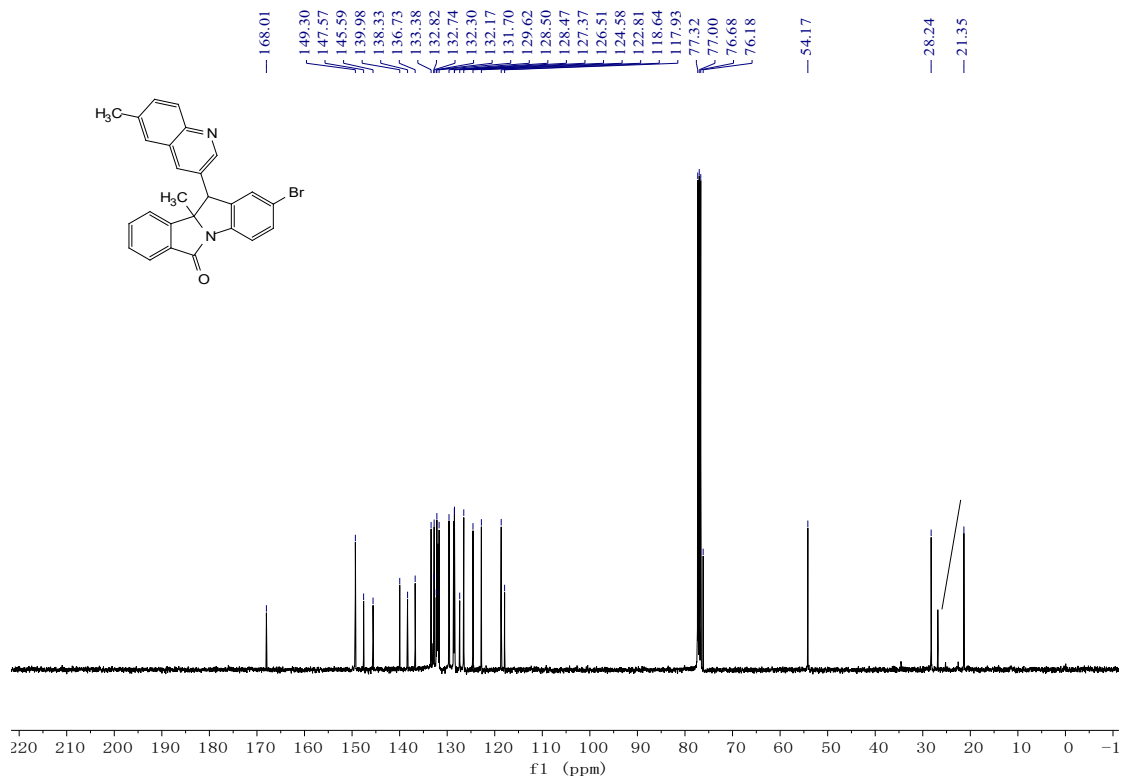

**3g-<sup>1</sup>H**

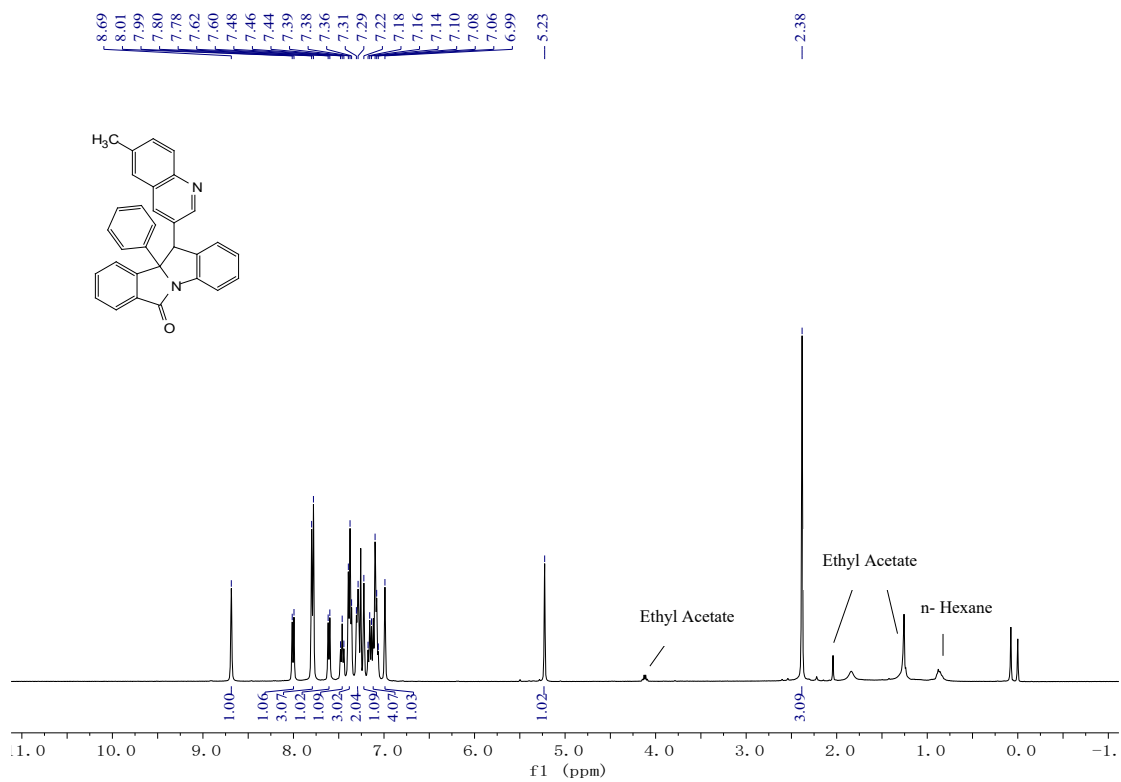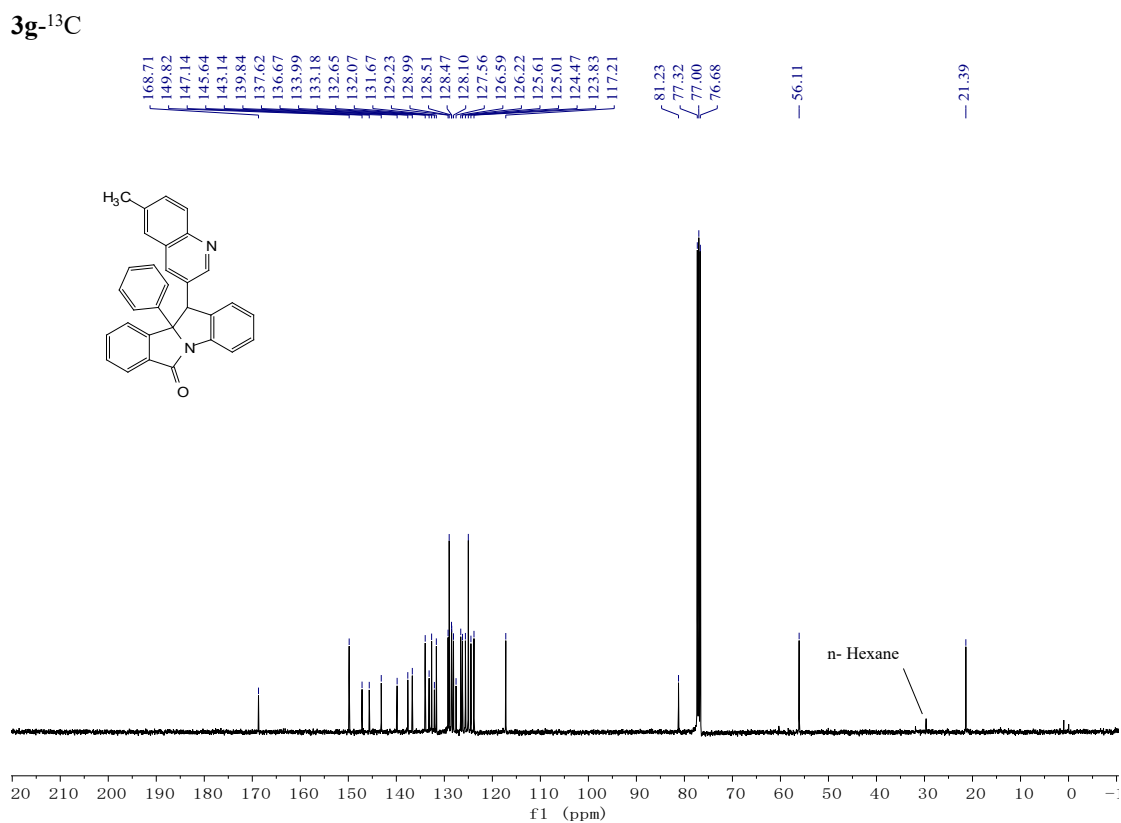

**3h-<sup>1</sup>H**

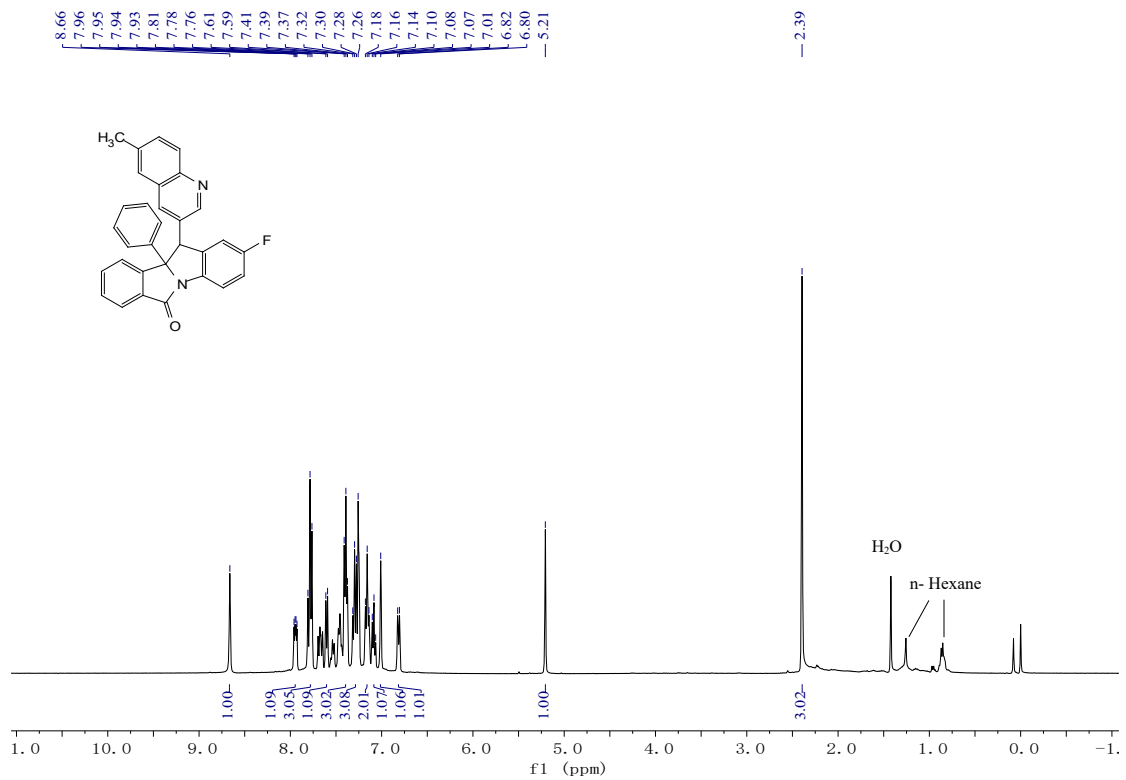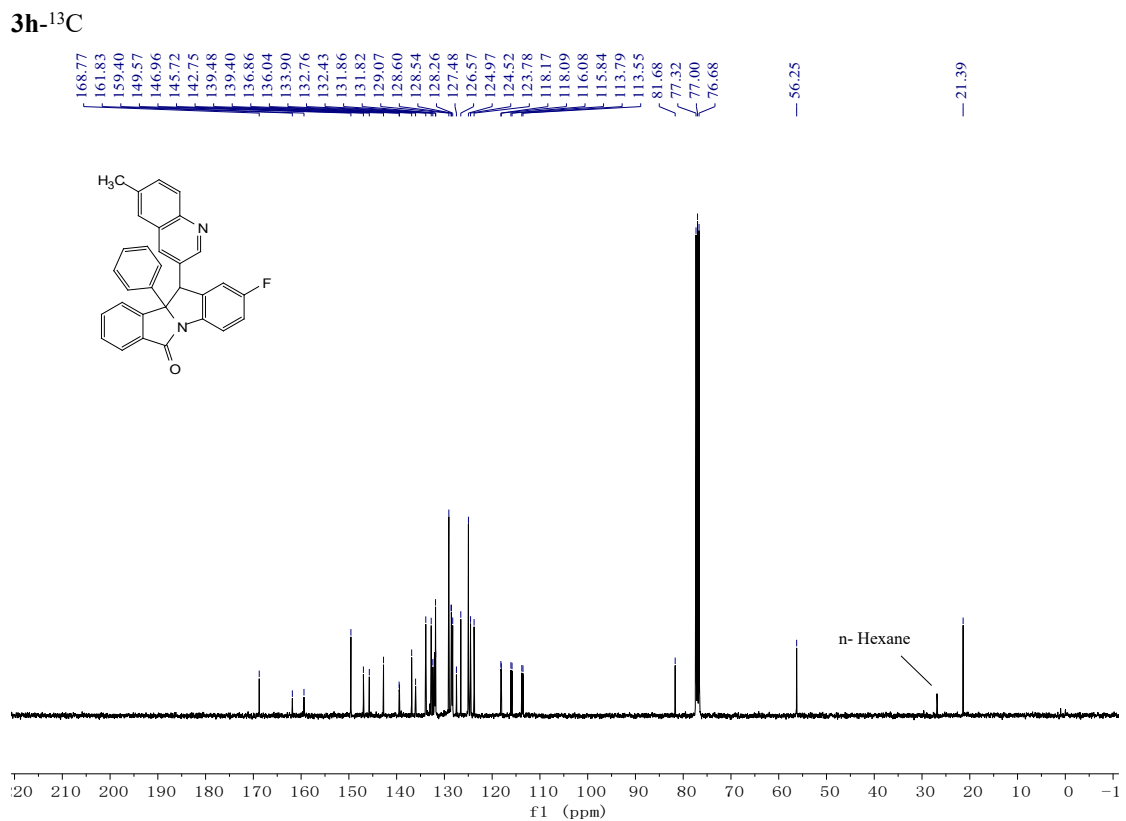

**3i-<sup>1</sup>H**

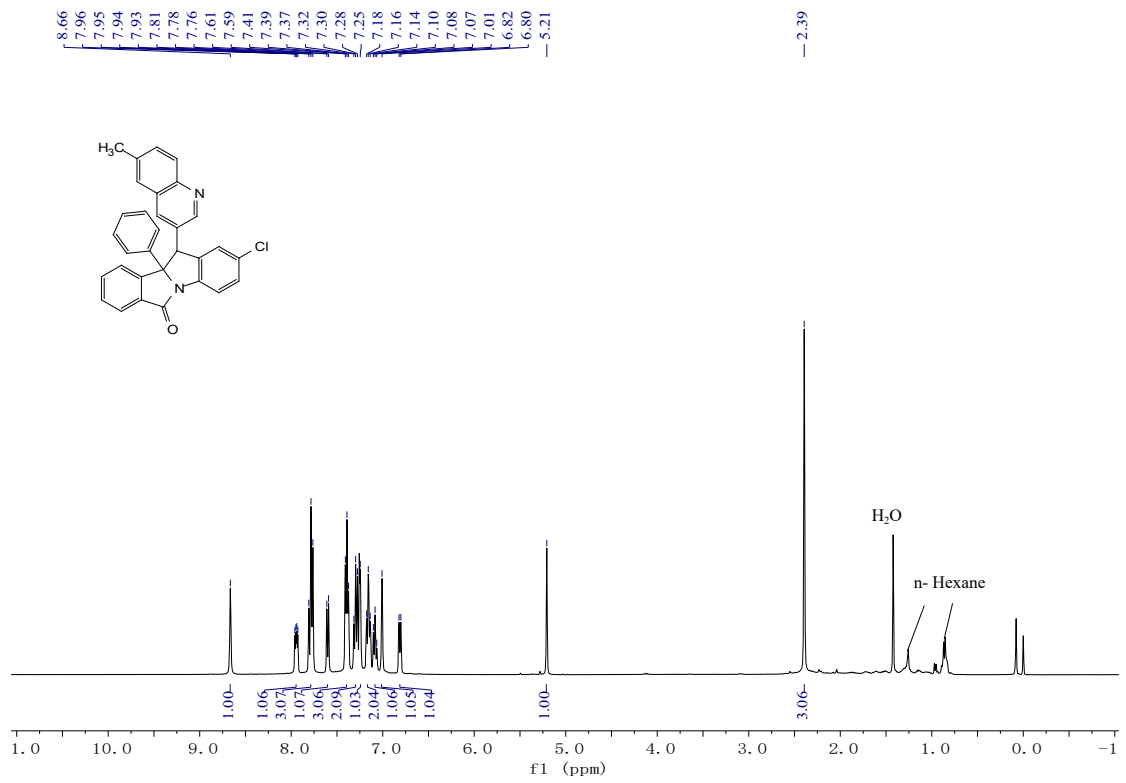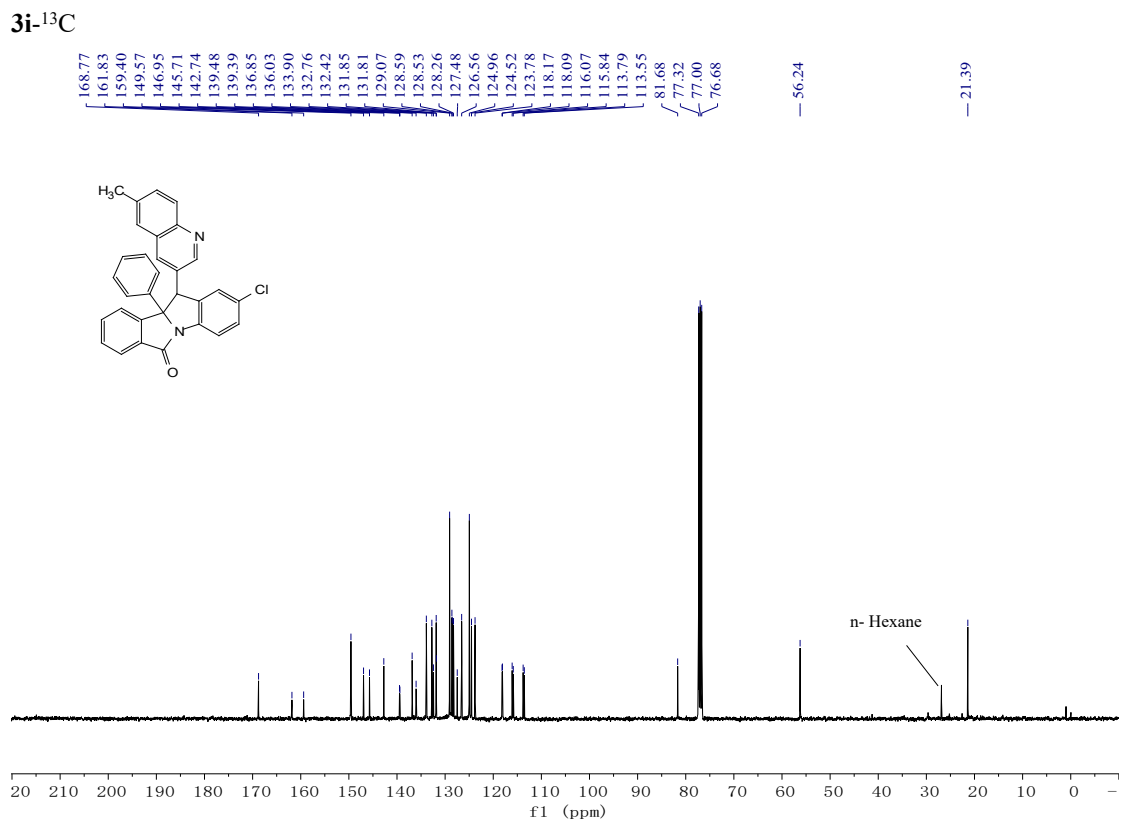

**3j-<sup>1</sup>H**

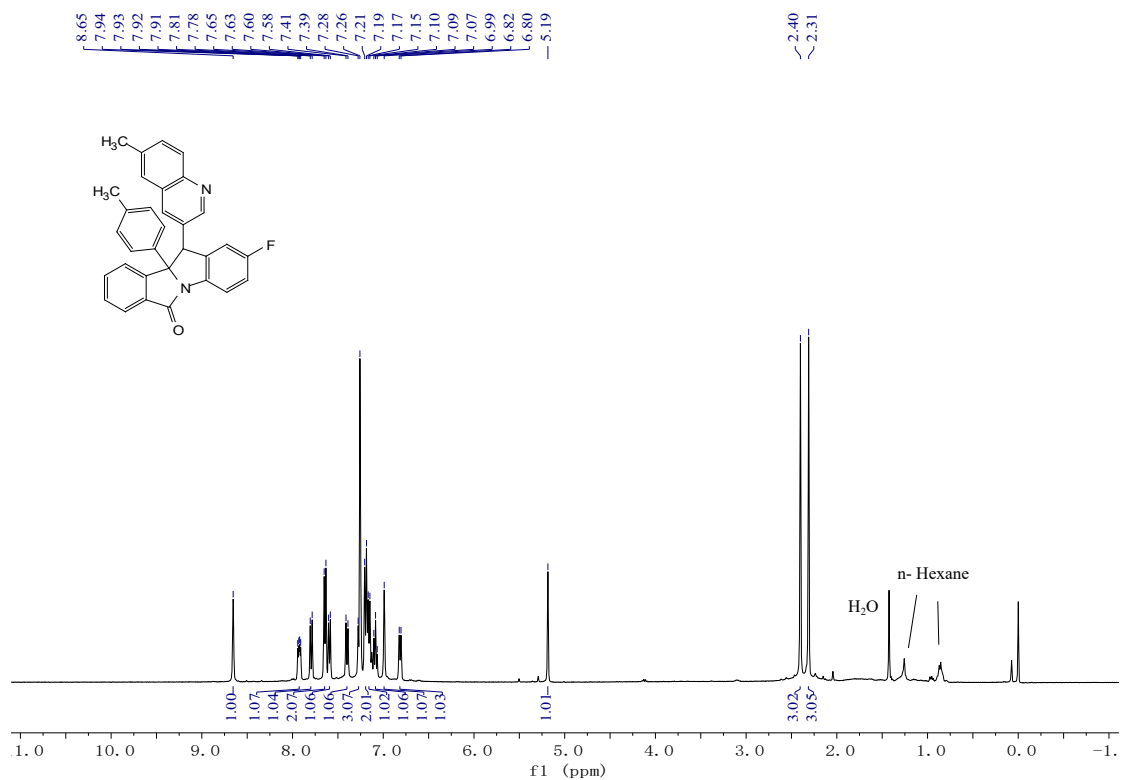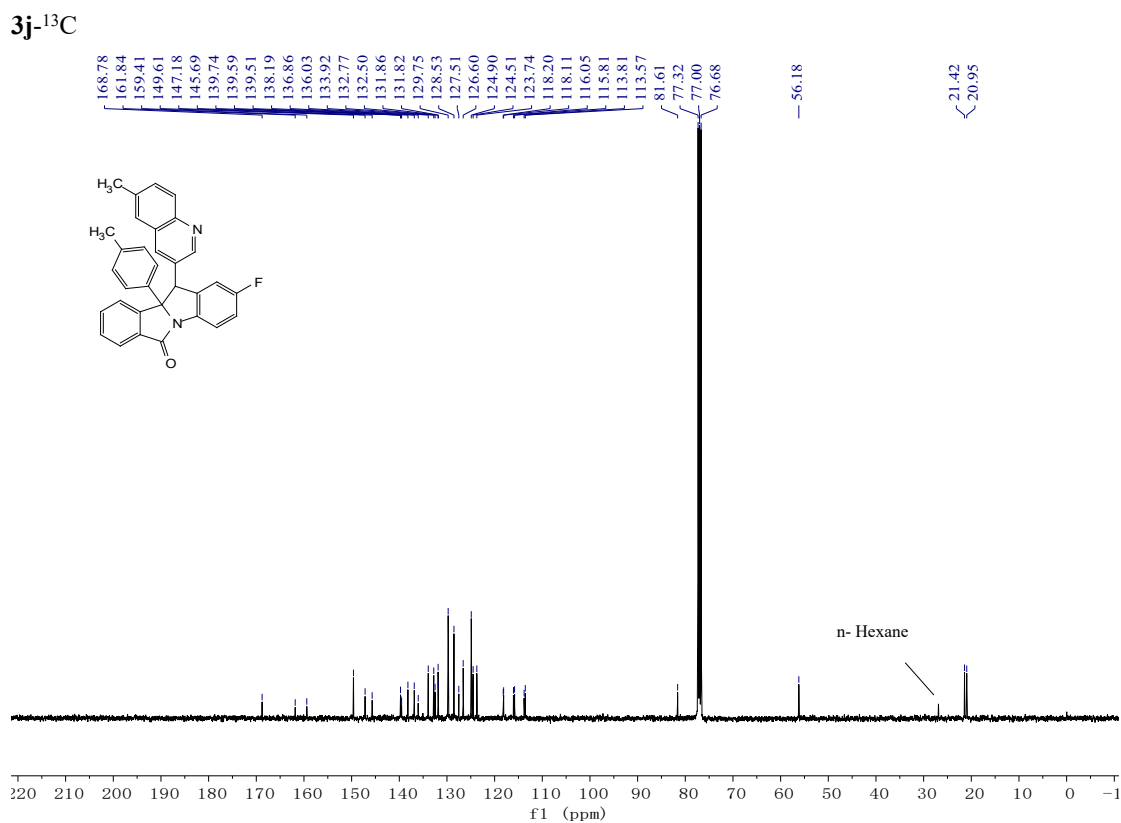

**3k-<sup>1</sup>H**

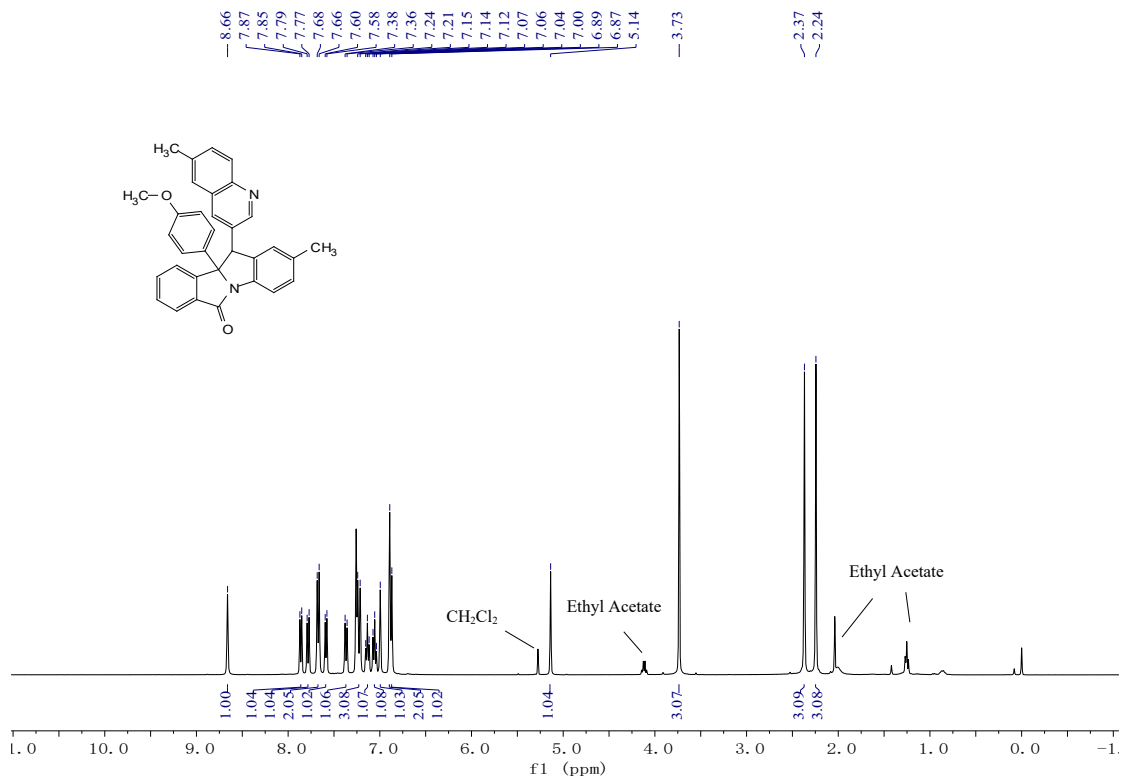

**3k-<sup>13</sup>C**

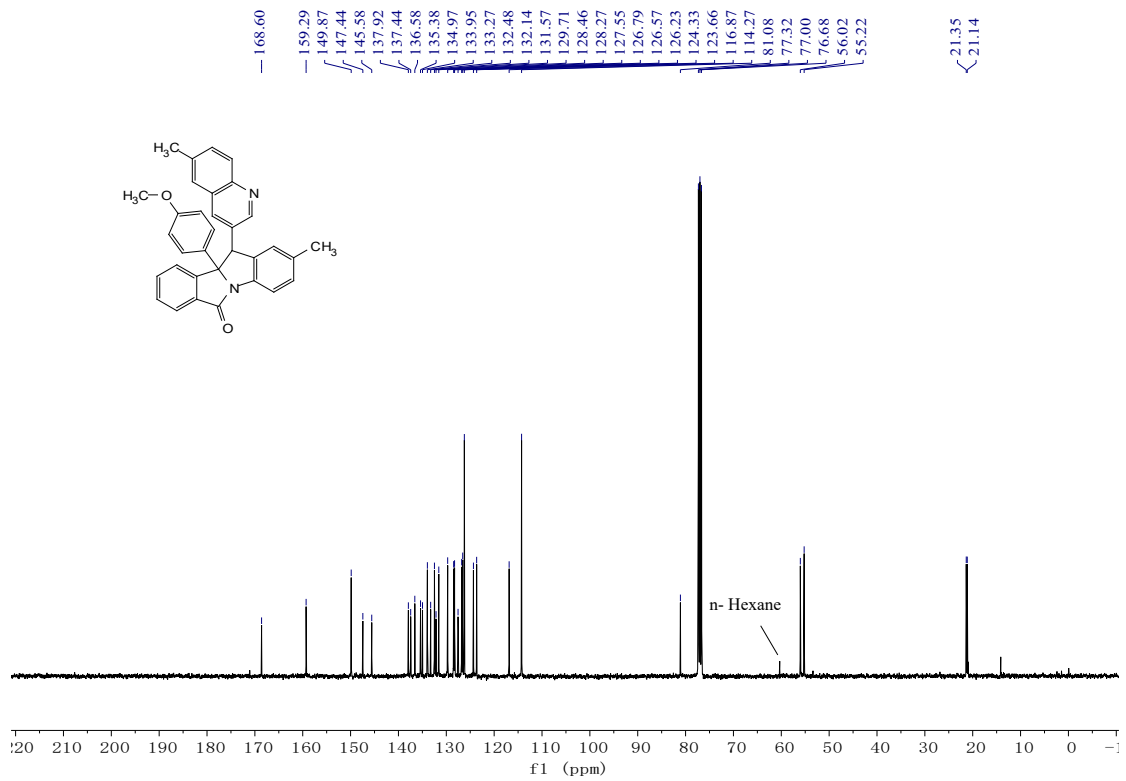

**3l-<sup>1</sup>H**

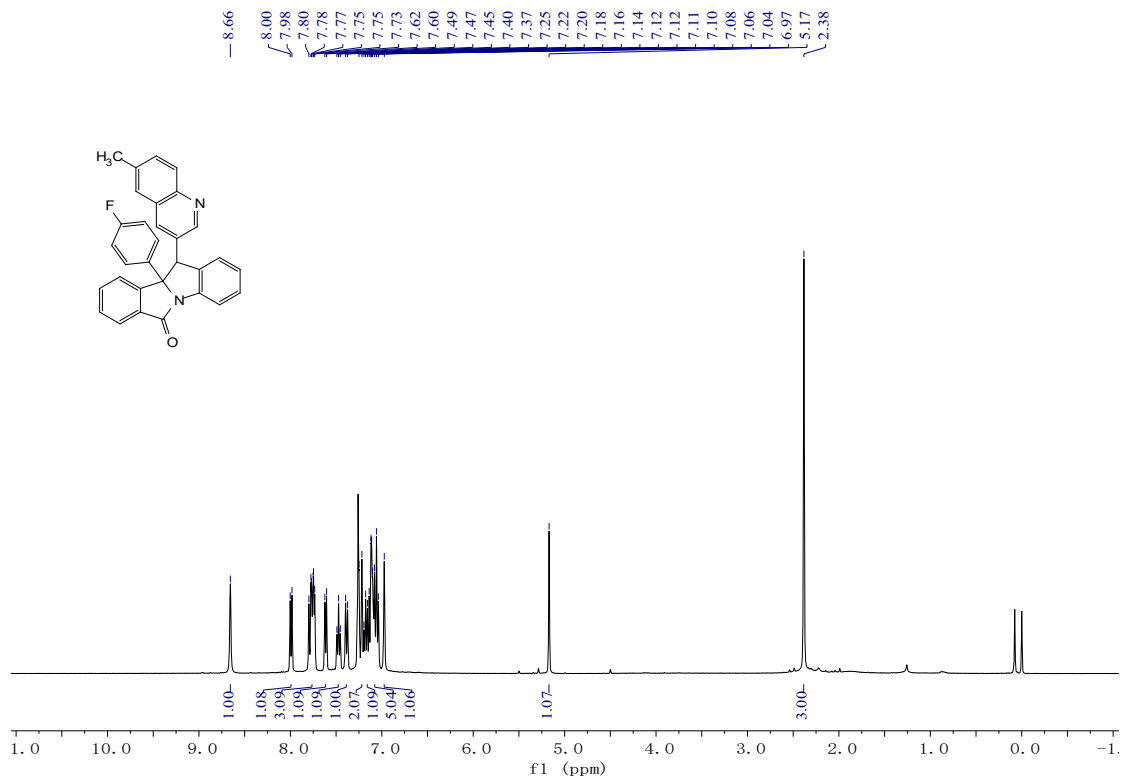

**3l-<sup>13</sup>C**

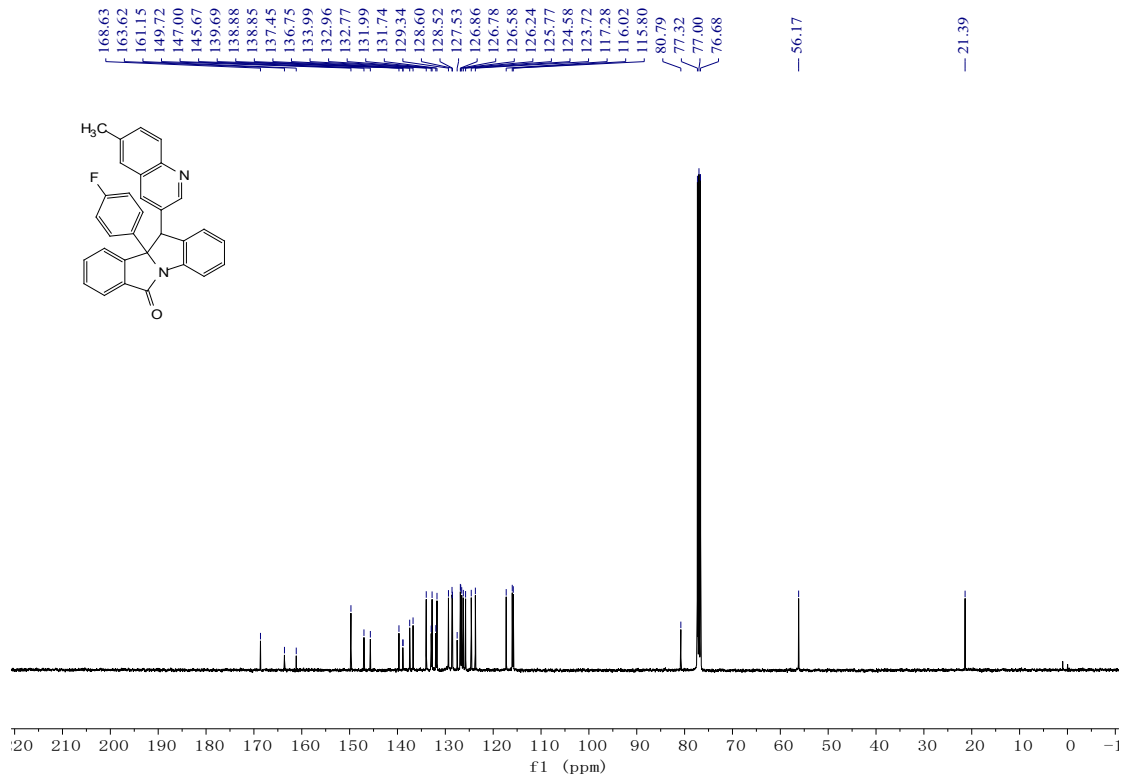

**3m-<sup>1</sup>H**

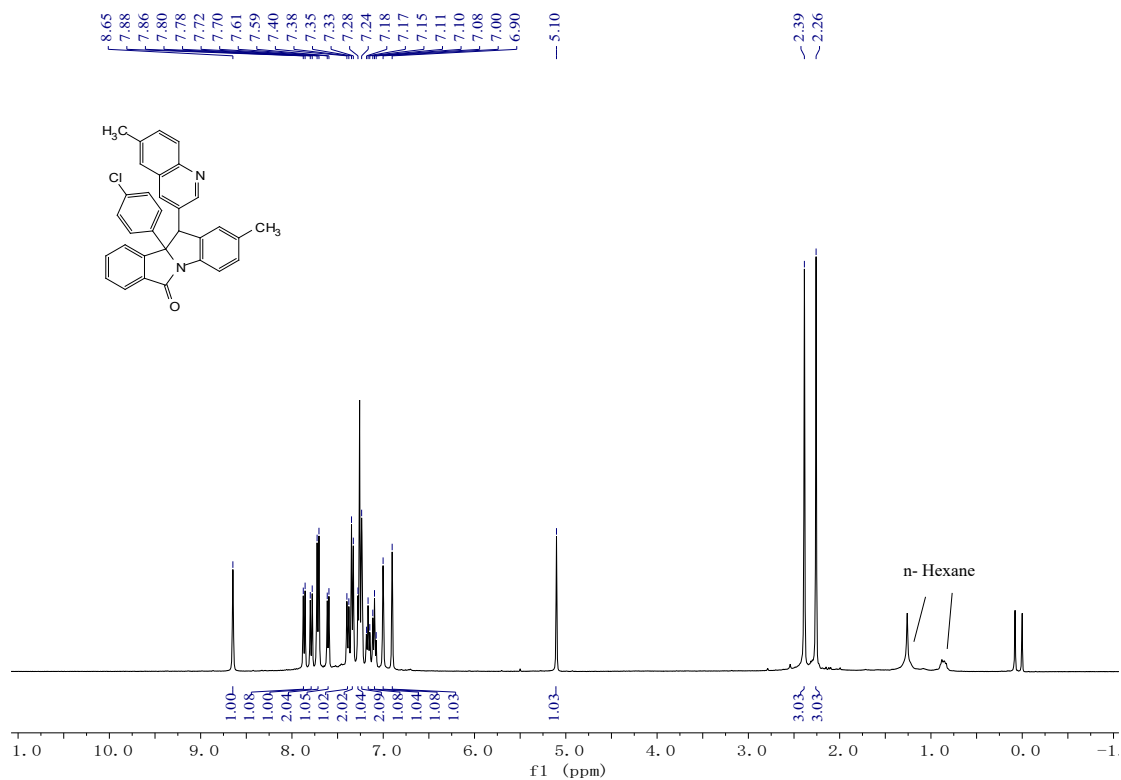

**3m-<sup>13</sup>C**

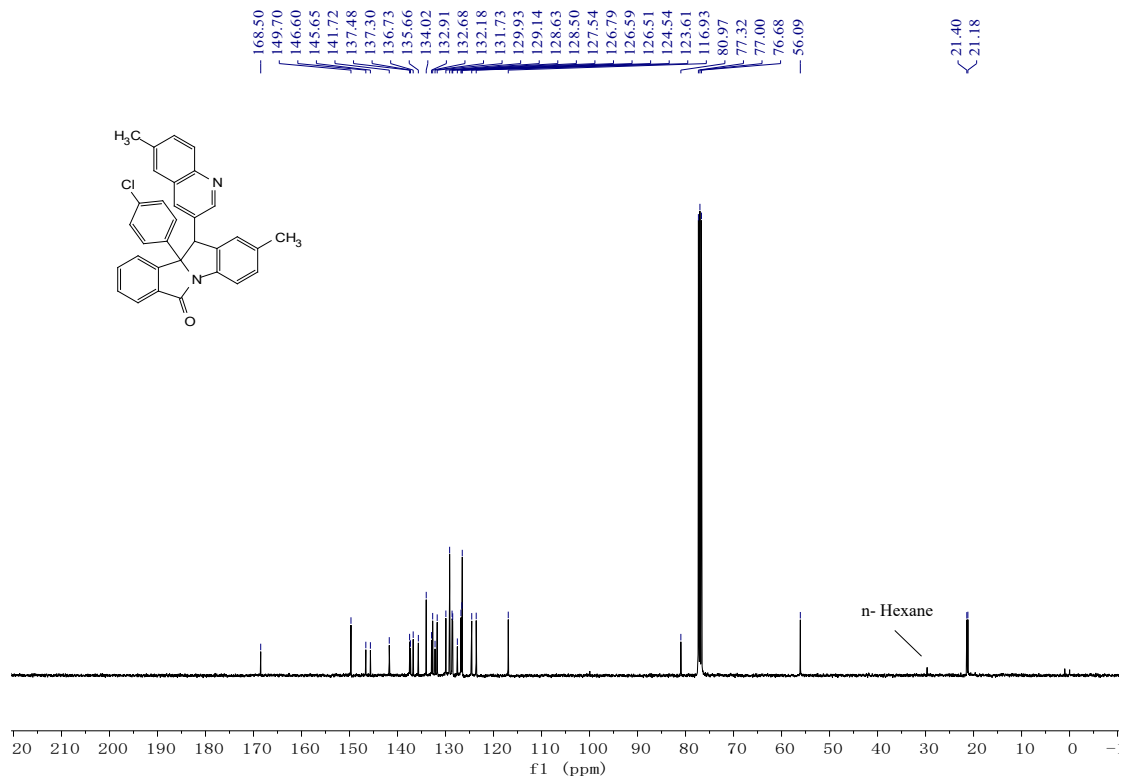

**3n-<sup>1</sup>H**



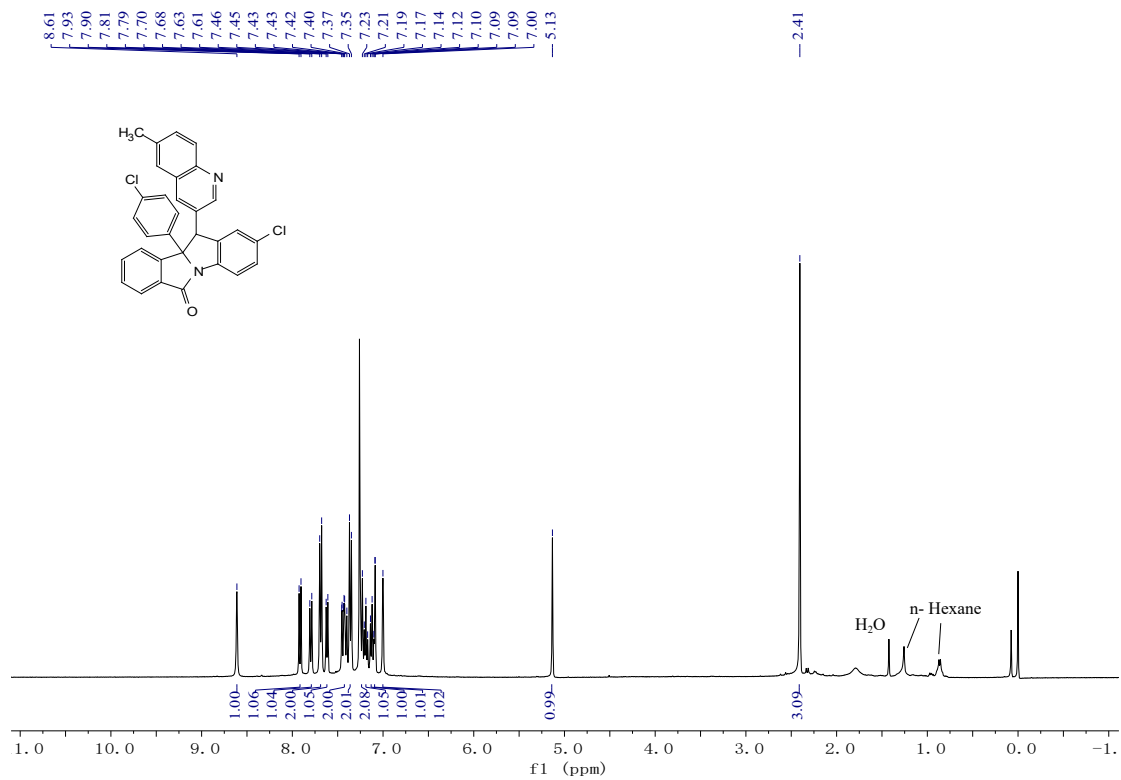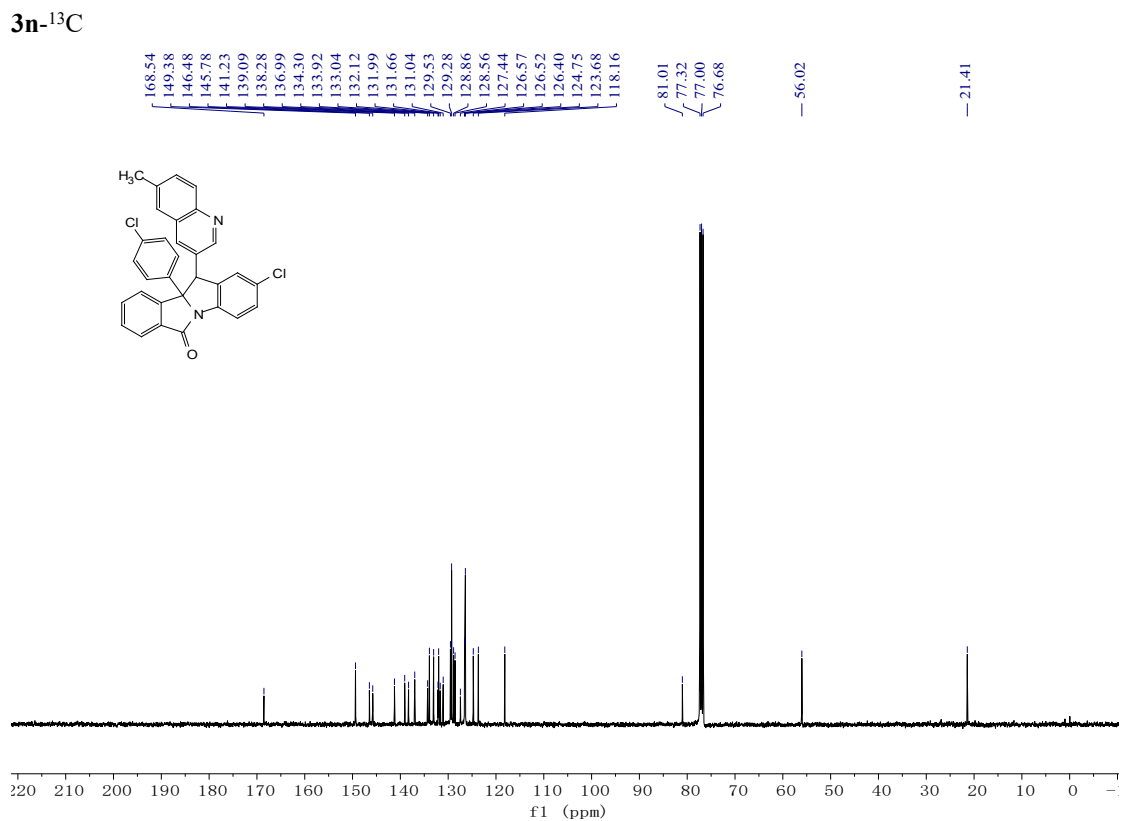

**3o-<sup>1</sup>H**

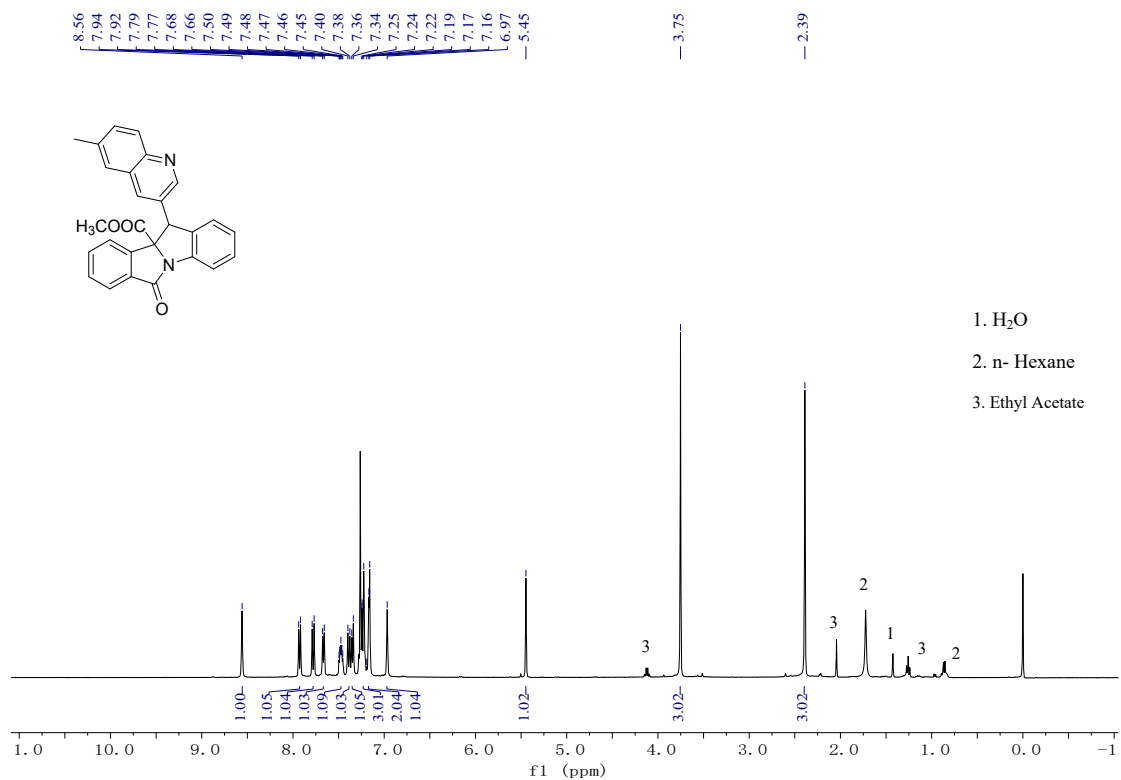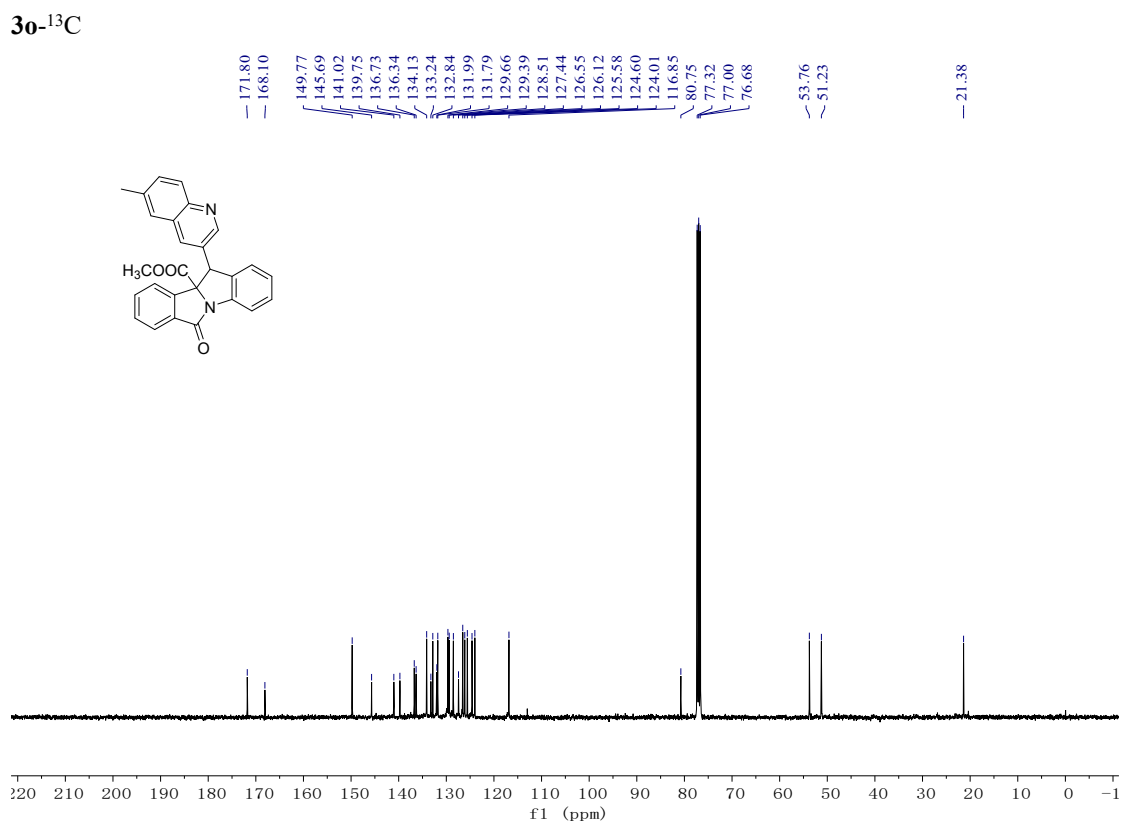

**3p-<sup>1</sup>H**

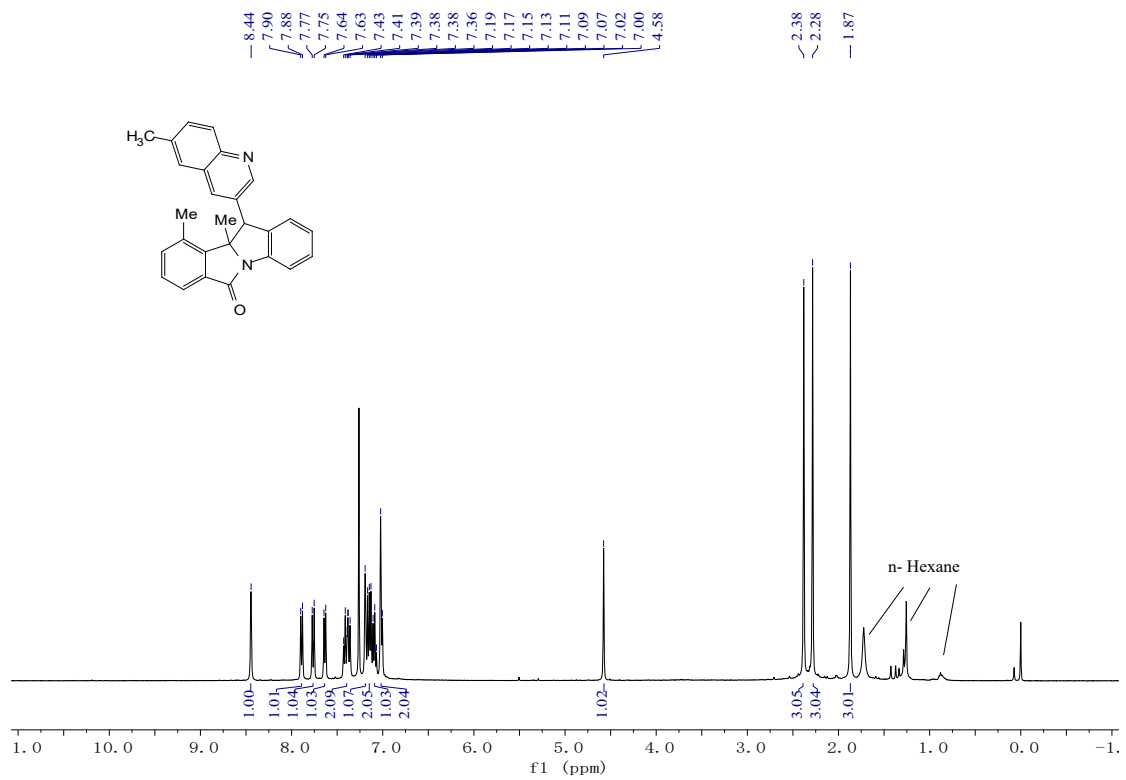

**3p-<sup>13</sup>C**

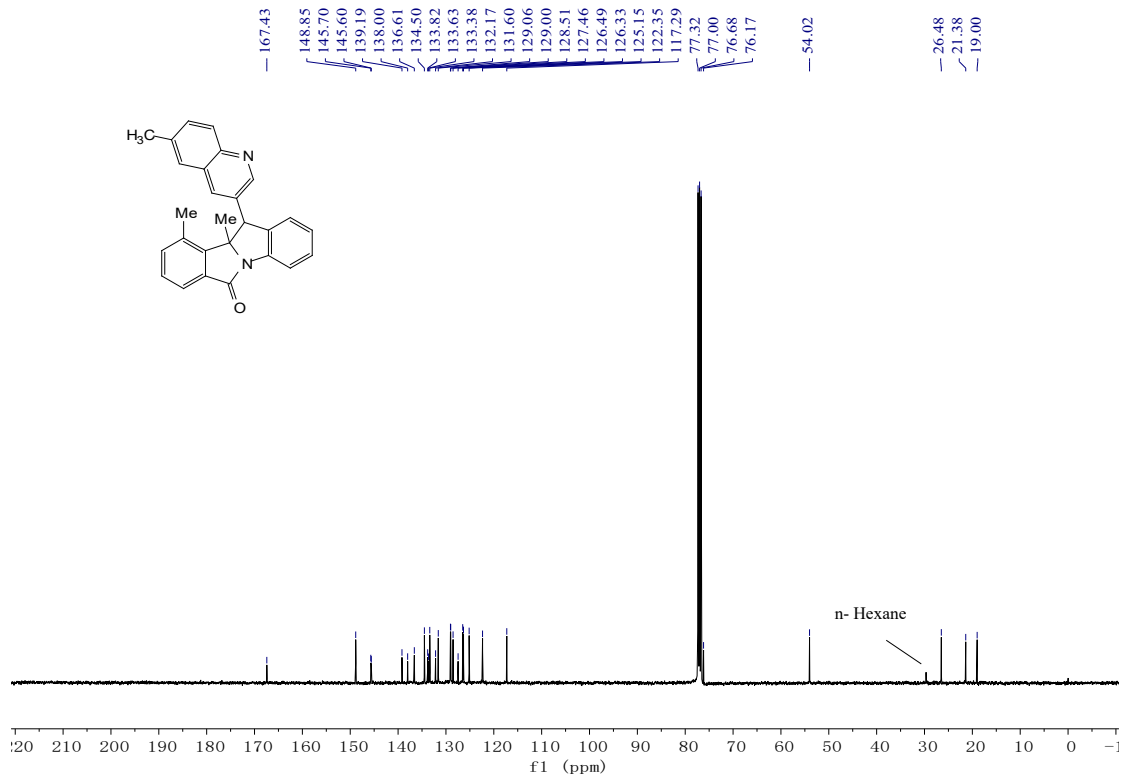

**3q-<sup>1</sup>H**

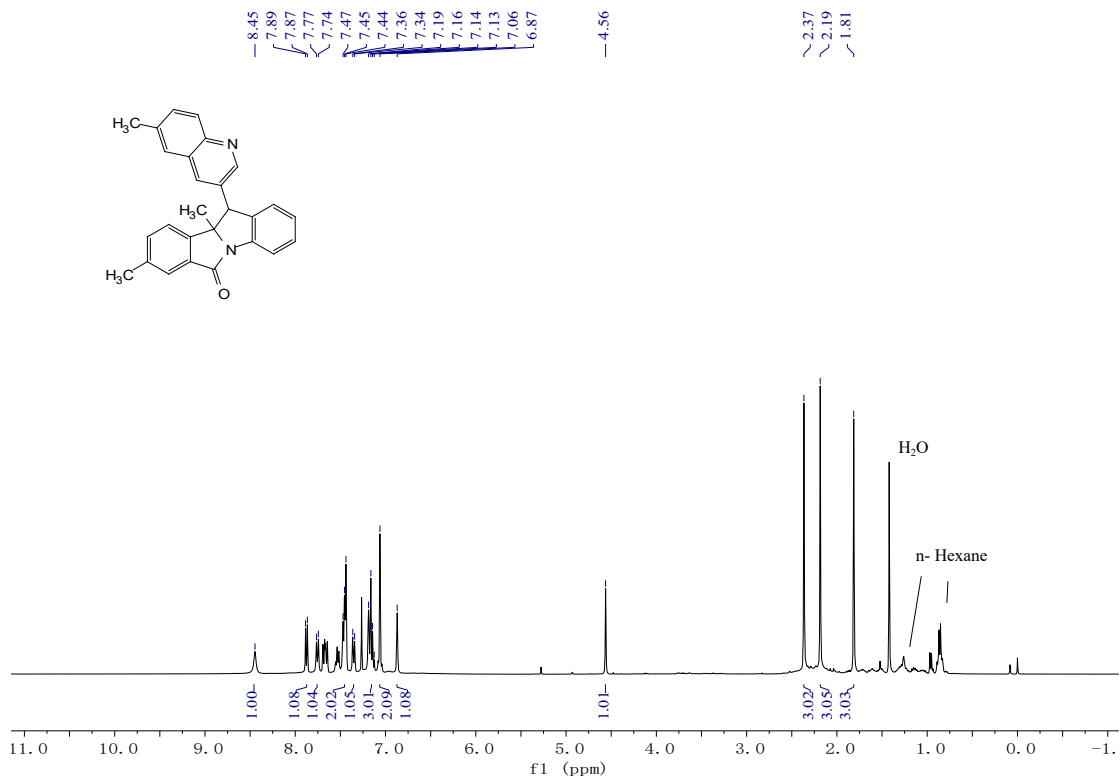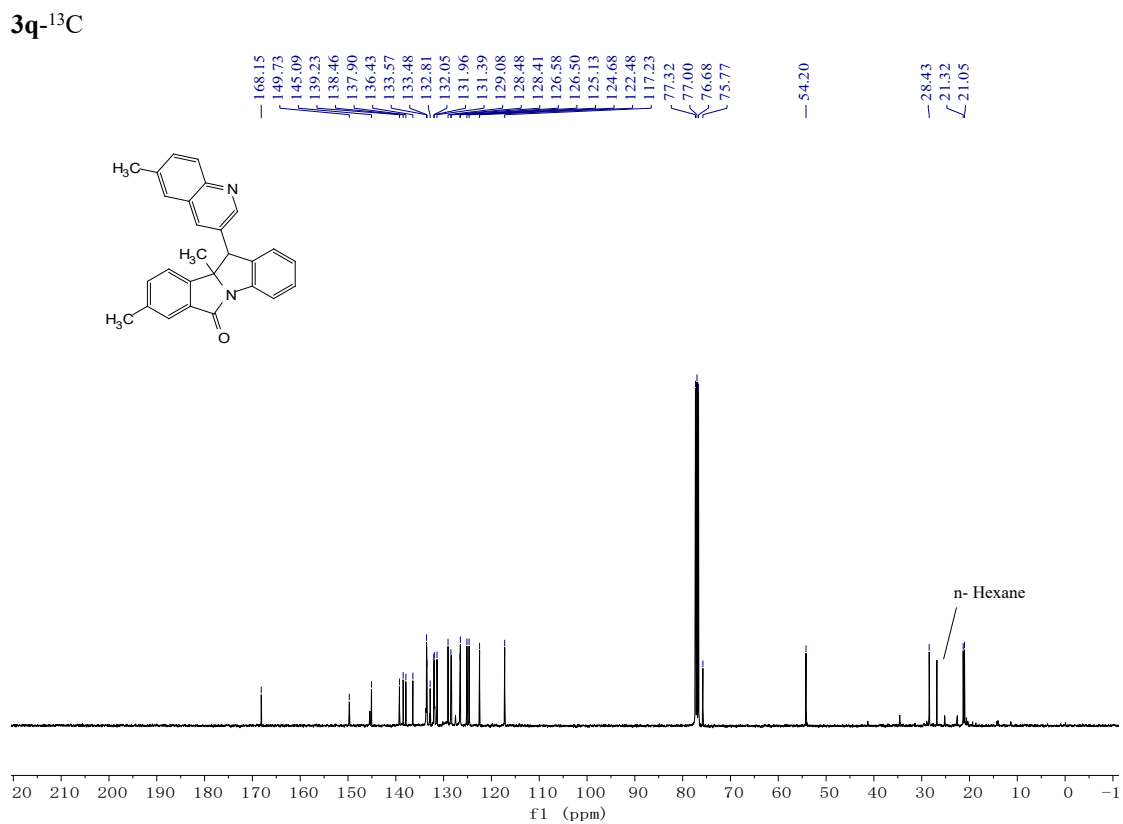

**3r-<sup>1</sup>H**

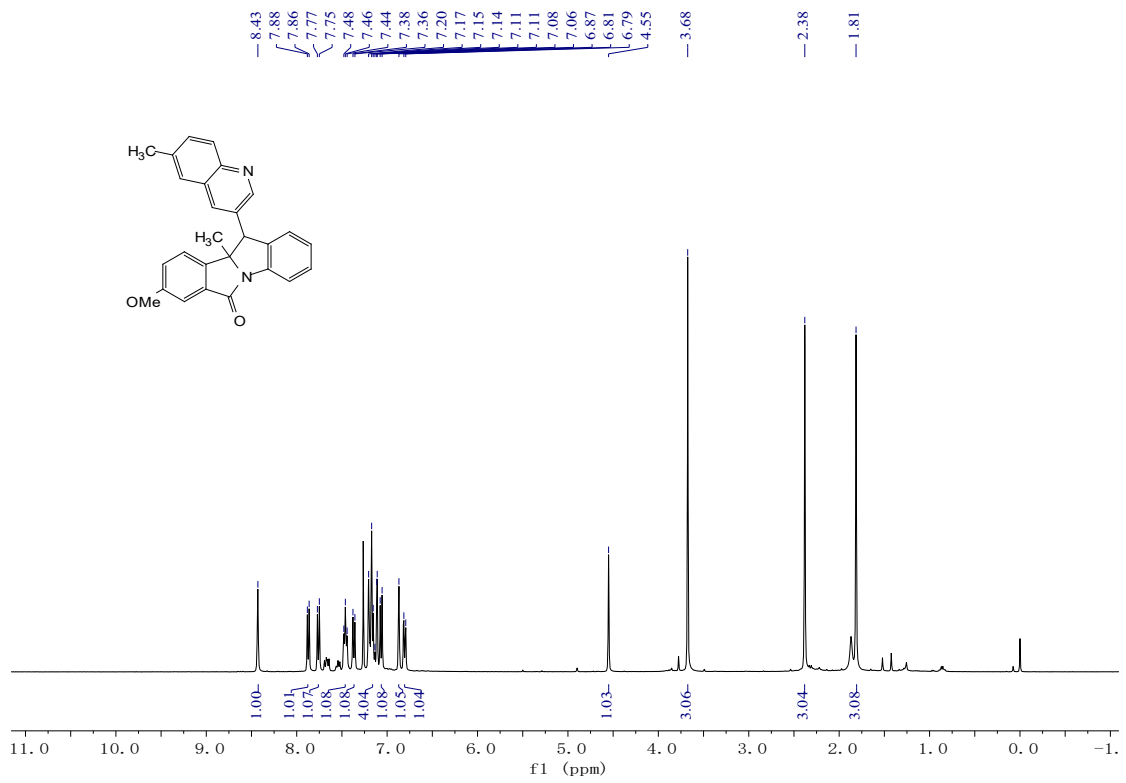

**3r-<sup>13</sup>C**

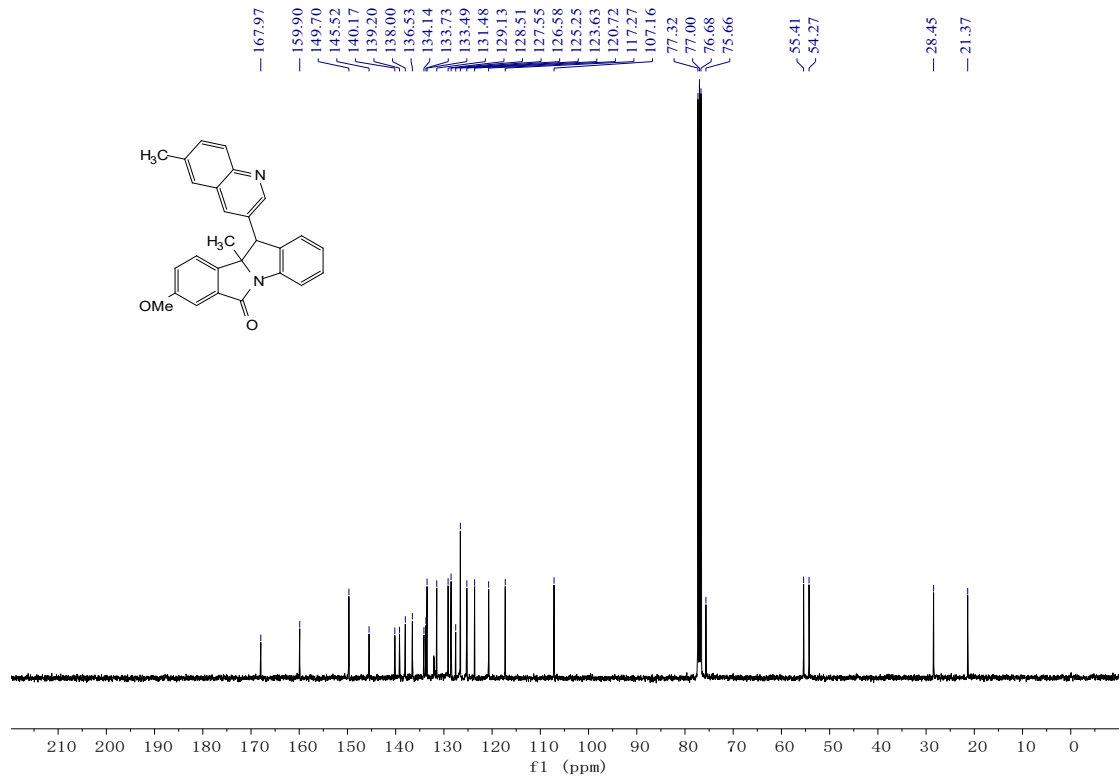

**5a-<sup>1</sup>H**

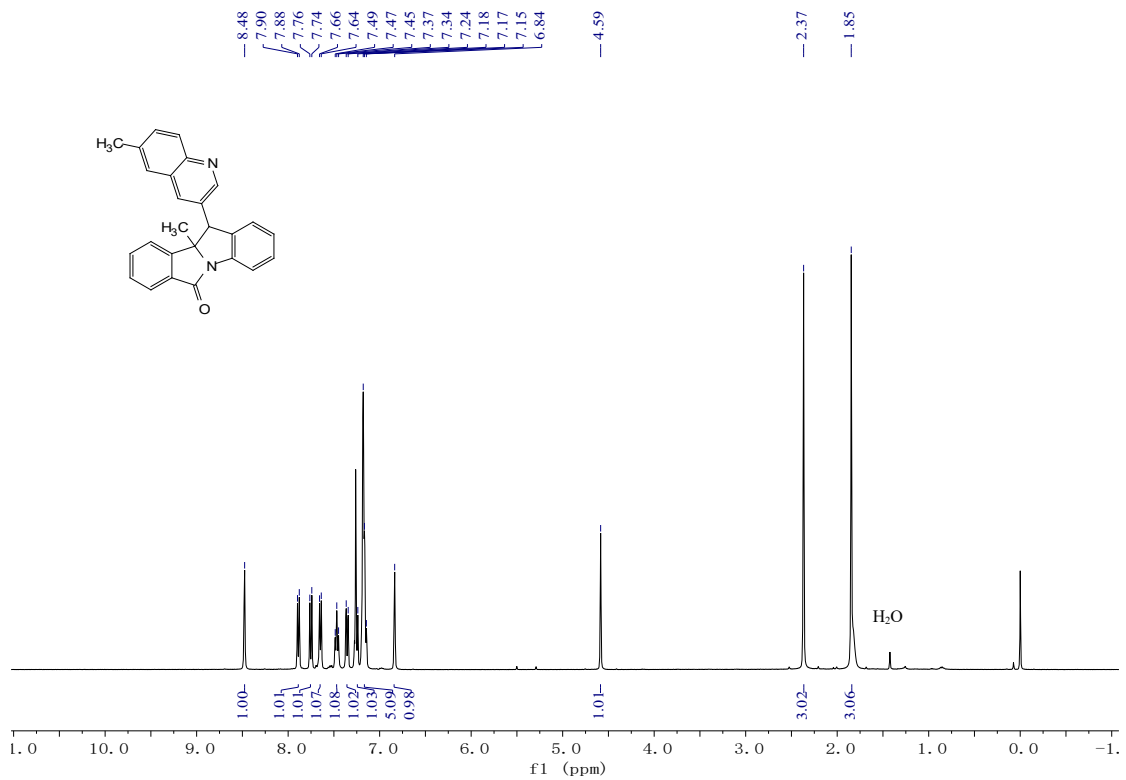

**5b-<sup>1</sup>H**

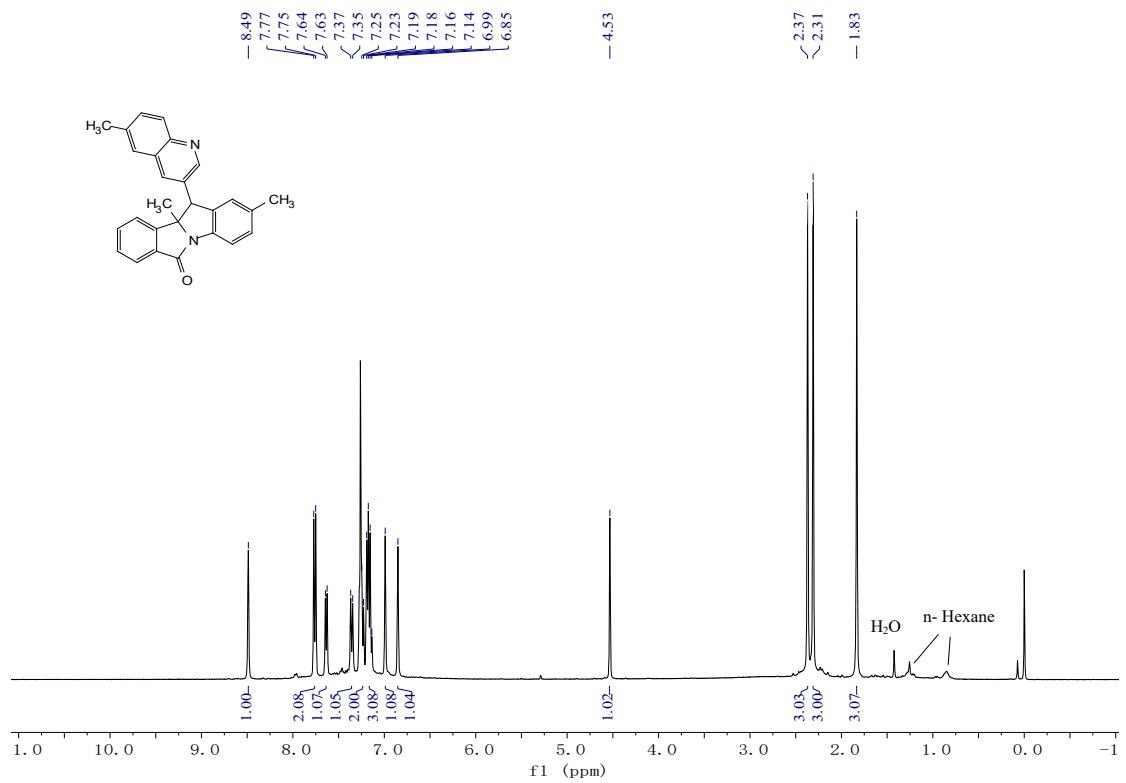

**5c-<sup>1</sup>H**

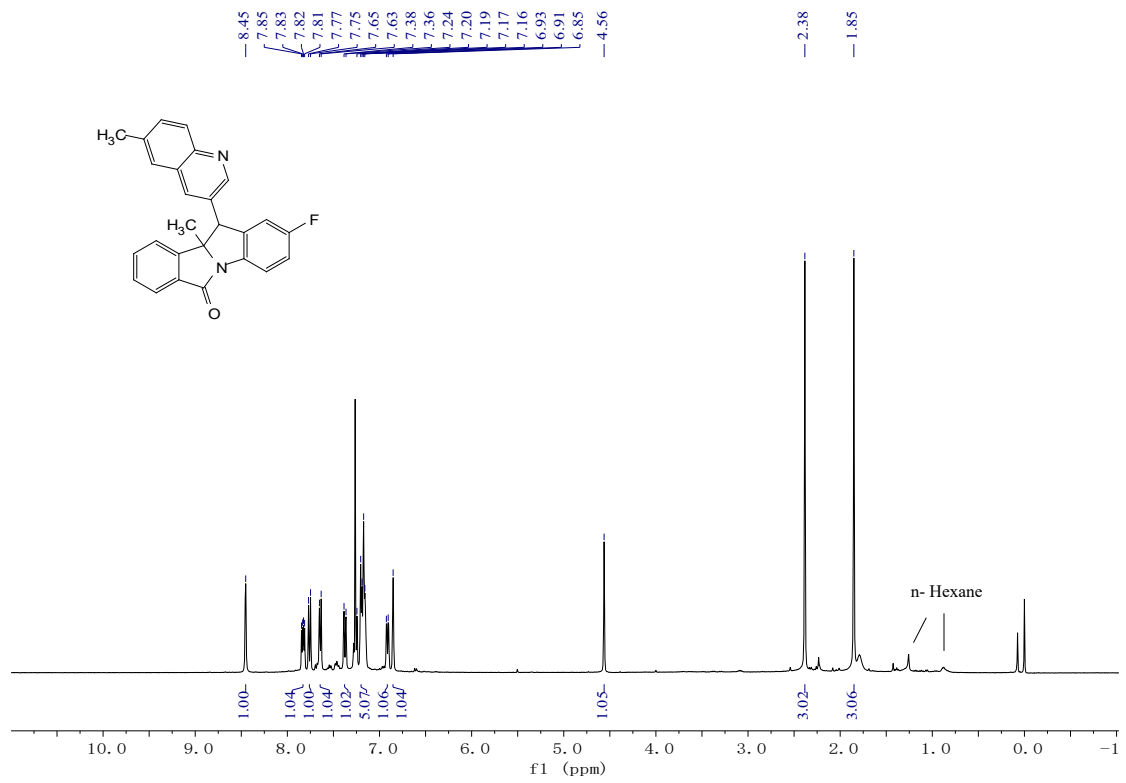

**5d-<sup>1</sup>H**

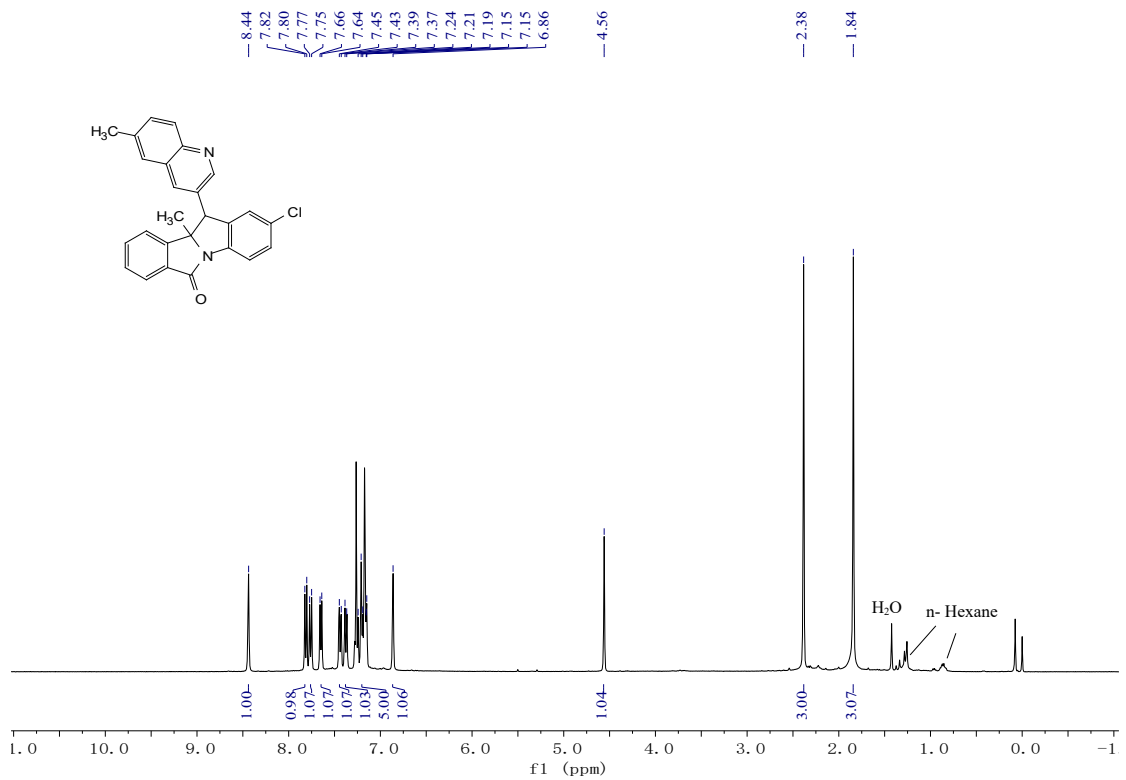

**5e-<sup>1</sup>H**

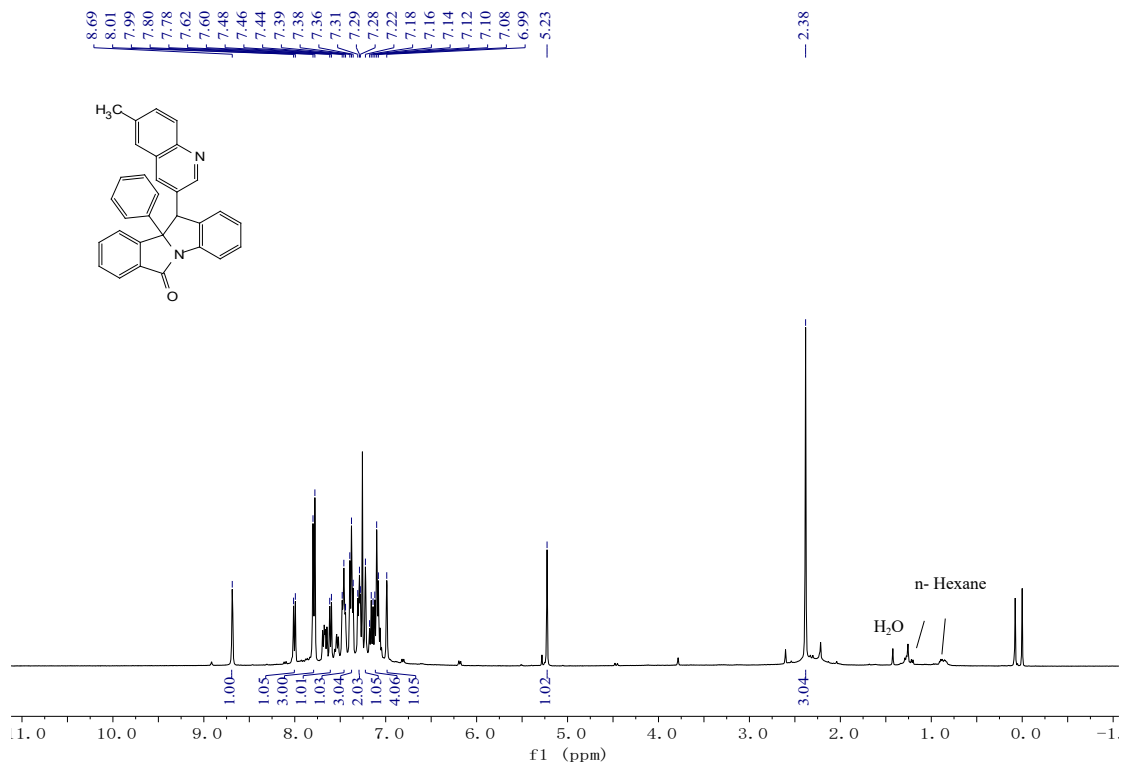

**5f-<sup>1</sup>H**

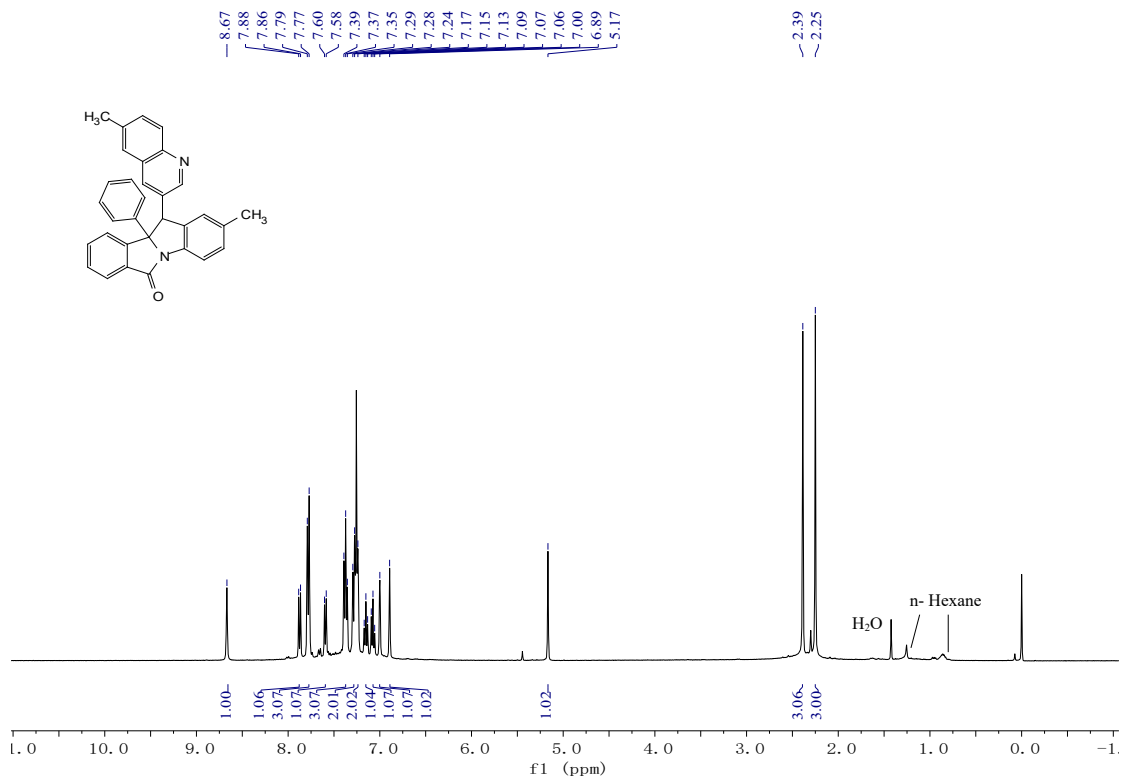

**5f-<sup>13</sup>C**



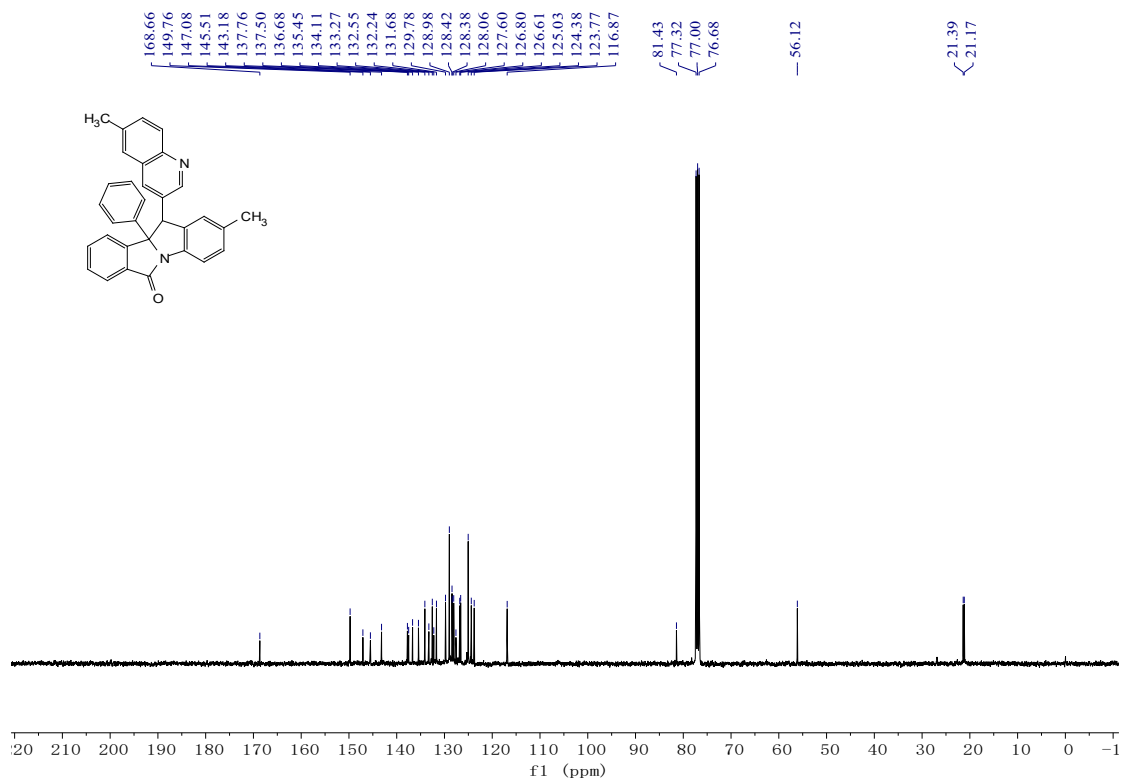

**5g-<sup>1</sup>H**

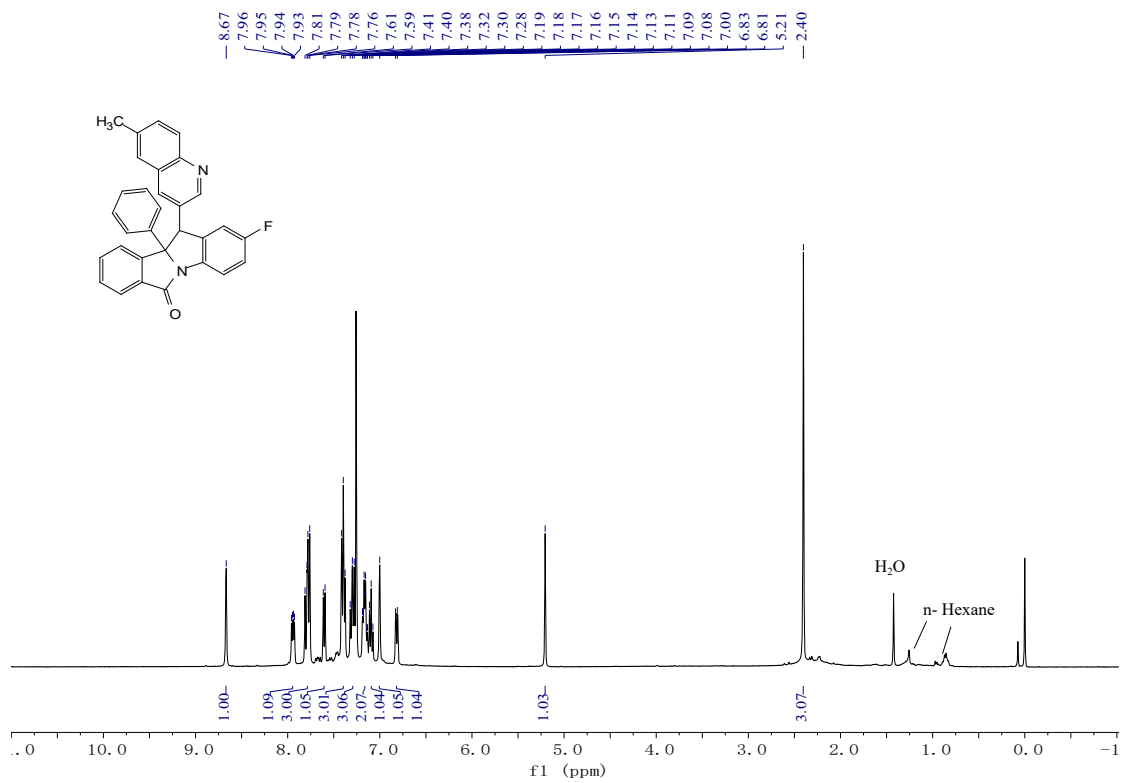

**5h-<sup>1</sup>H**

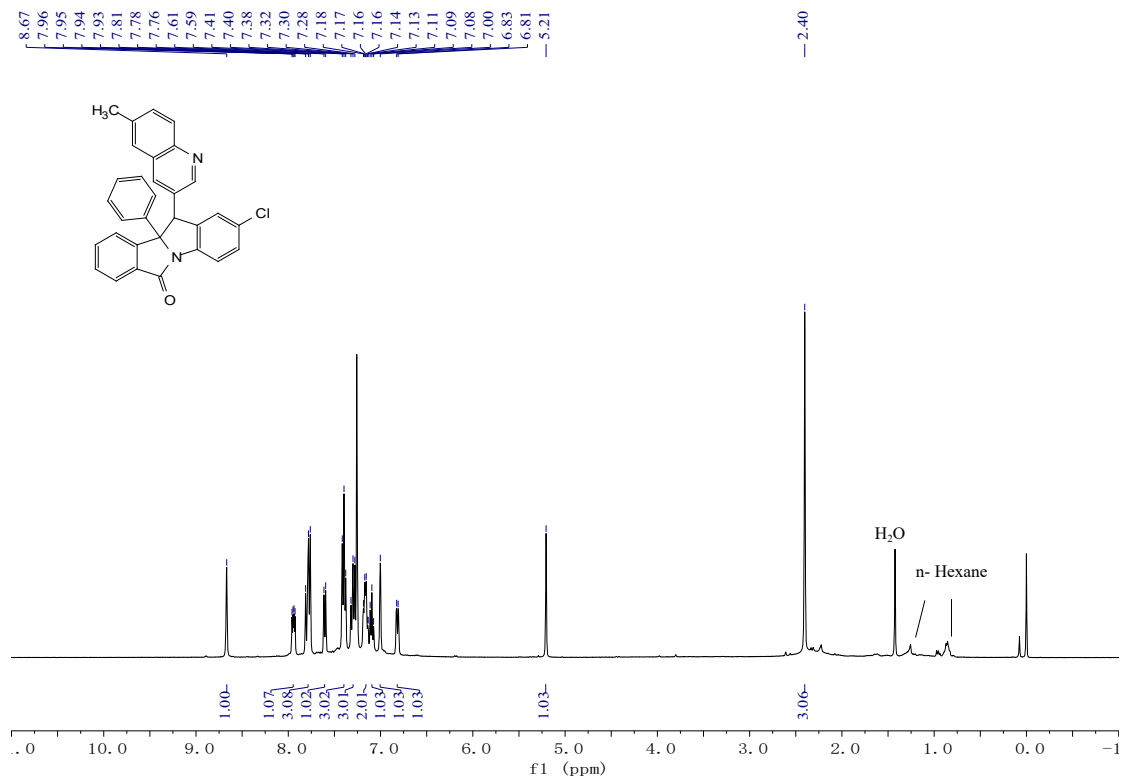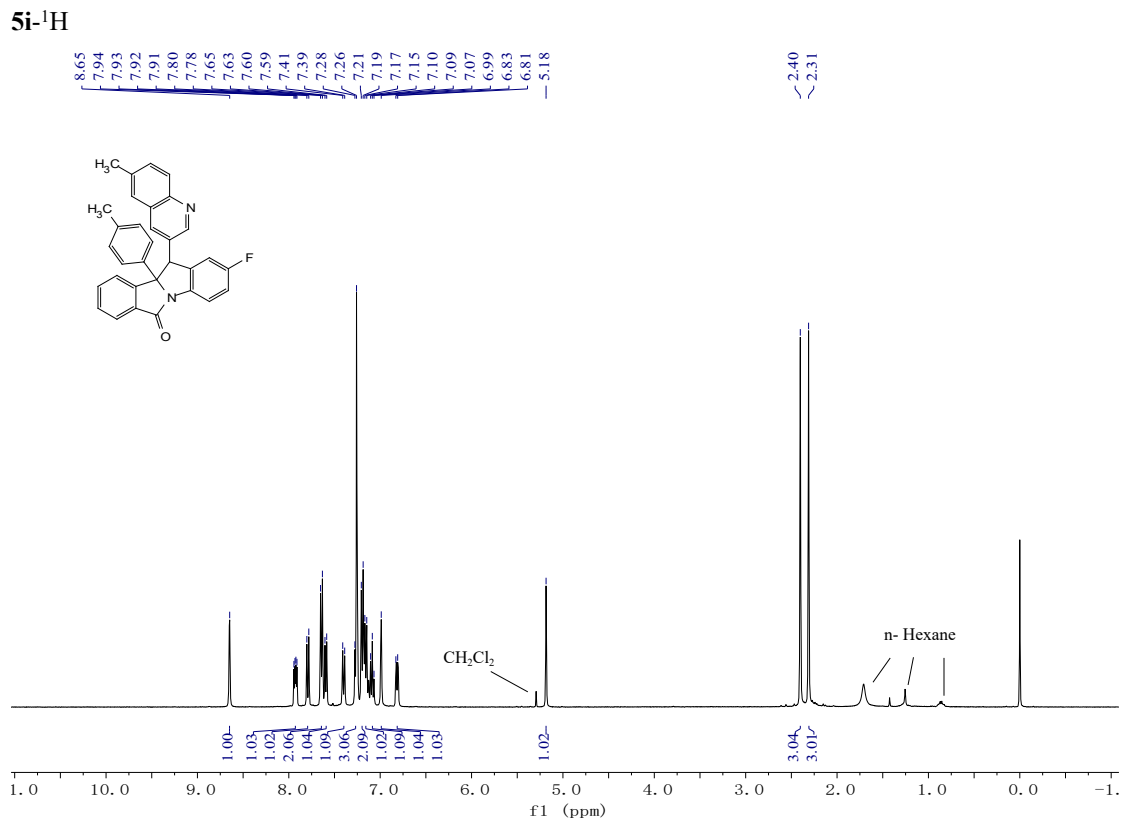

**5j-<sup>1</sup>H**

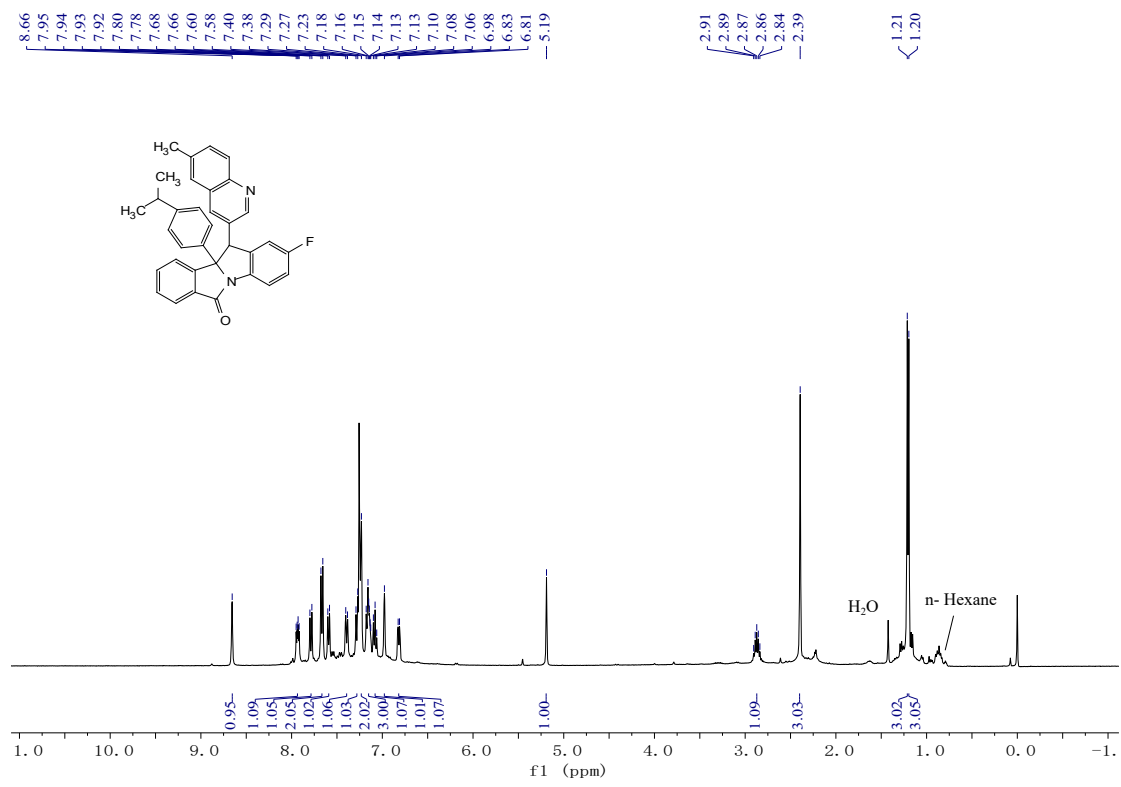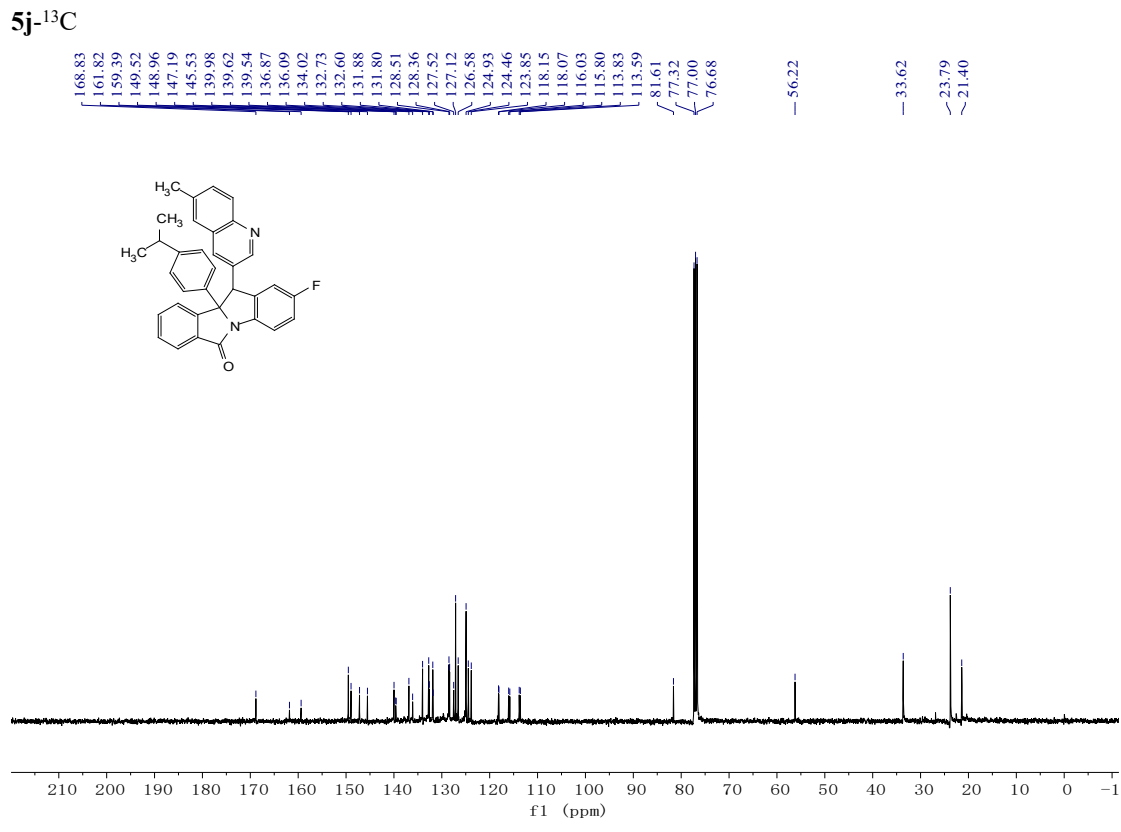

**5k-<sup>1</sup>H**

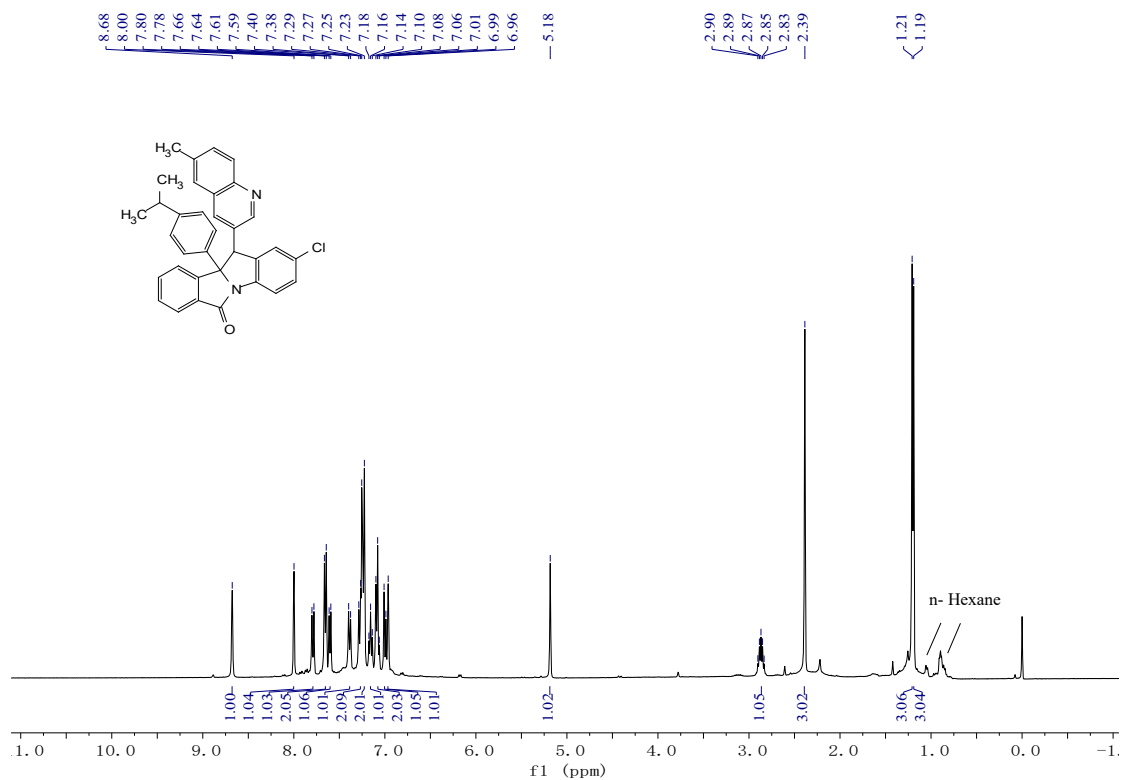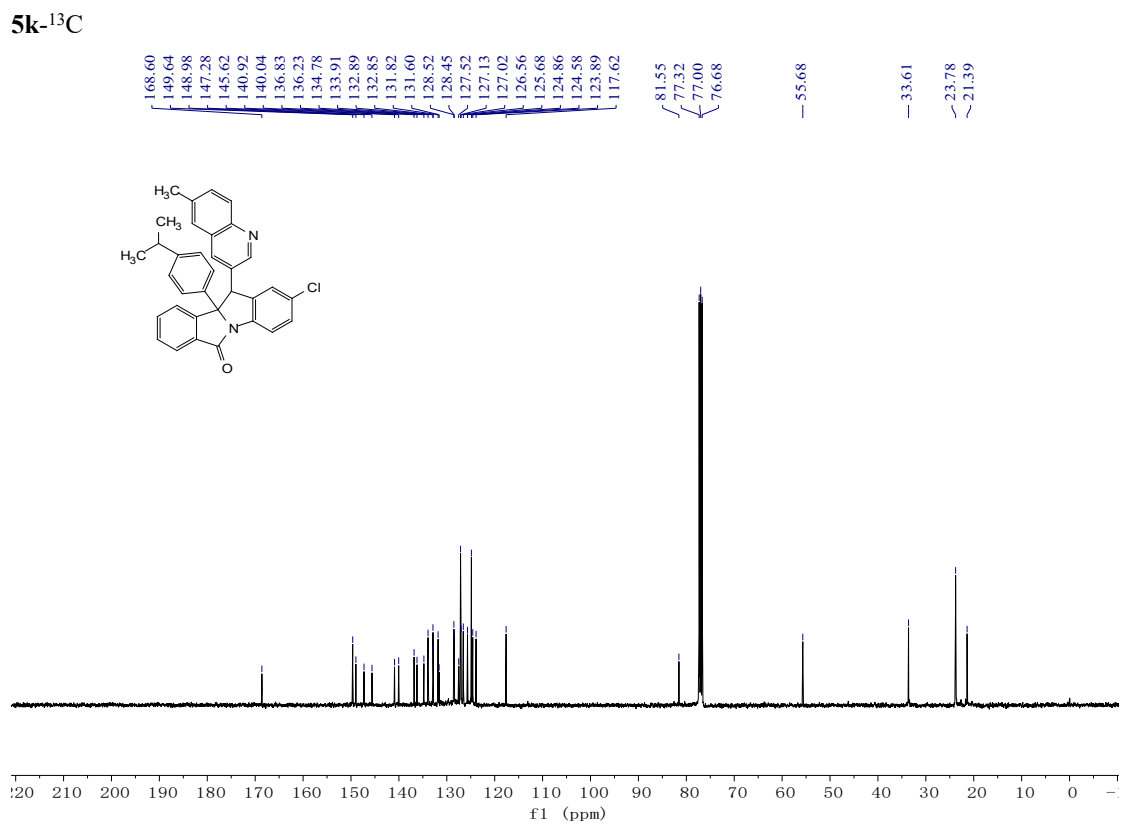

**5l-<sup>1</sup>H**

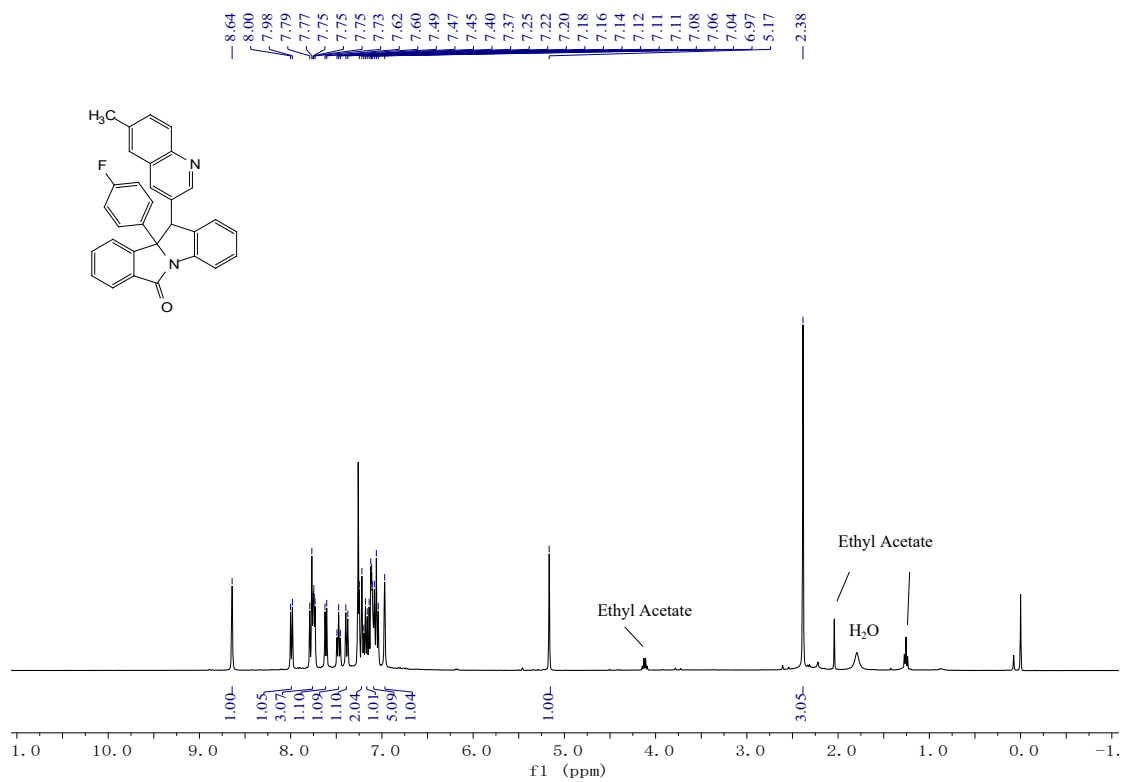

**5m-<sup>1</sup>H**

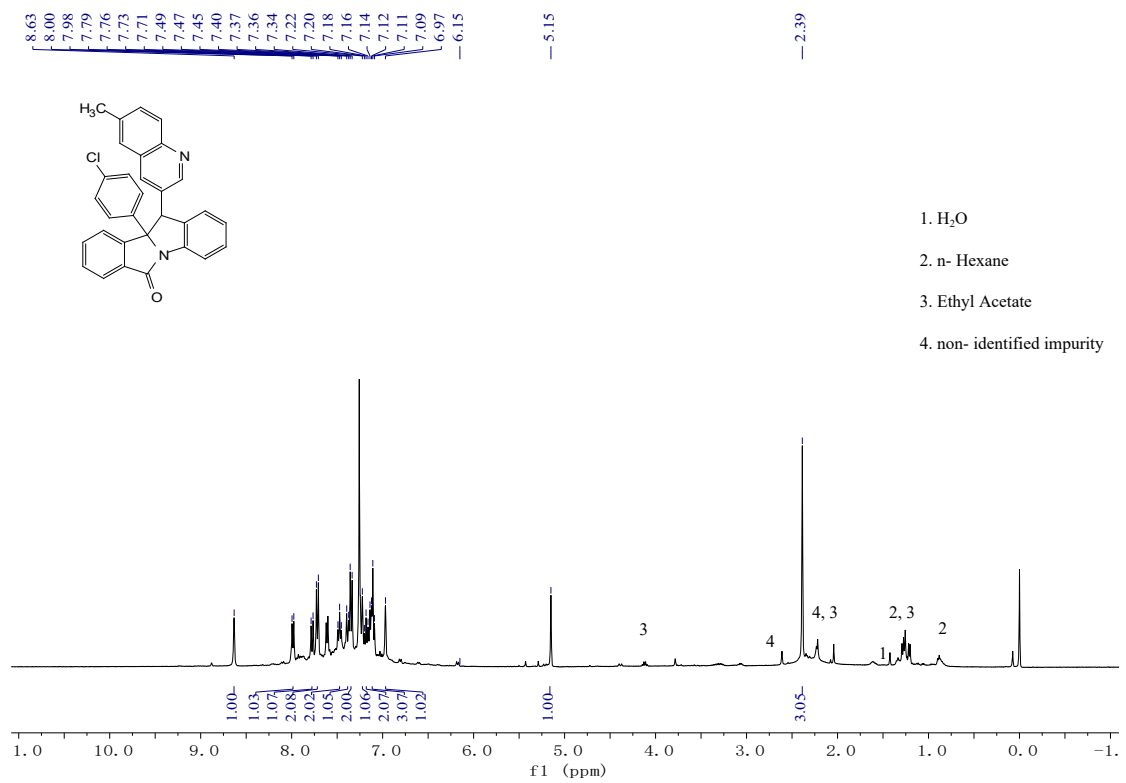

**5m-<sup>13</sup>C**

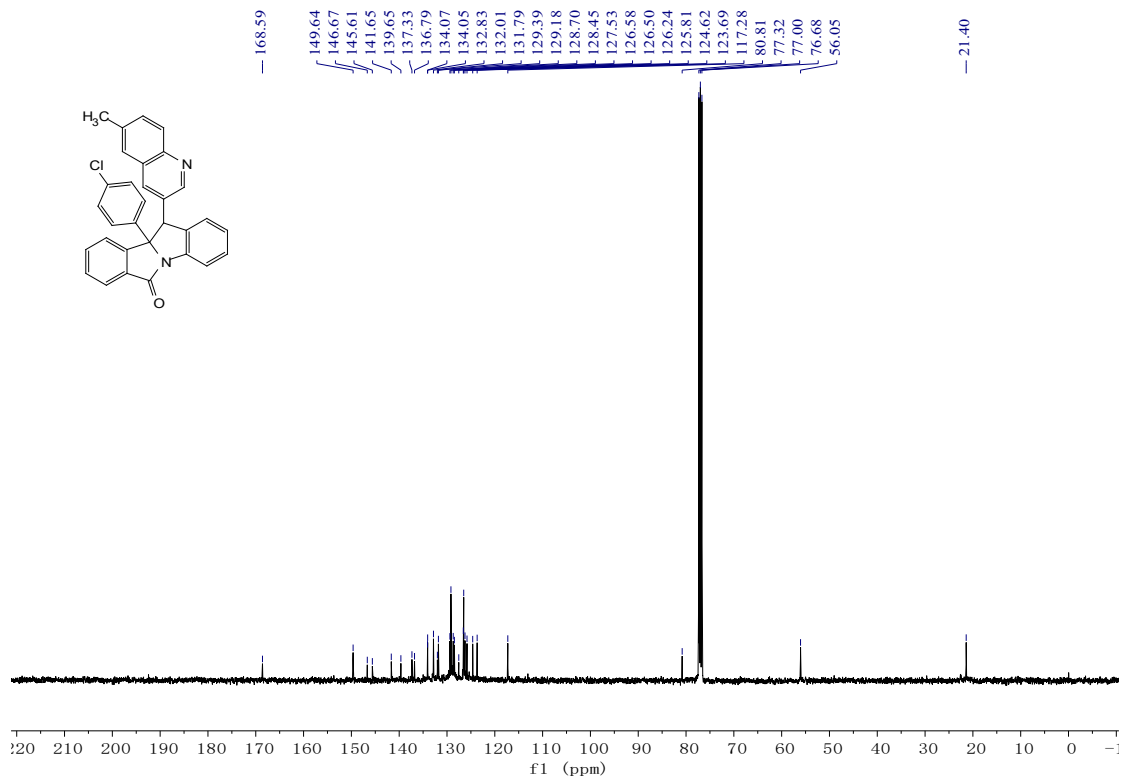

**5n- $^1\text{H}$**

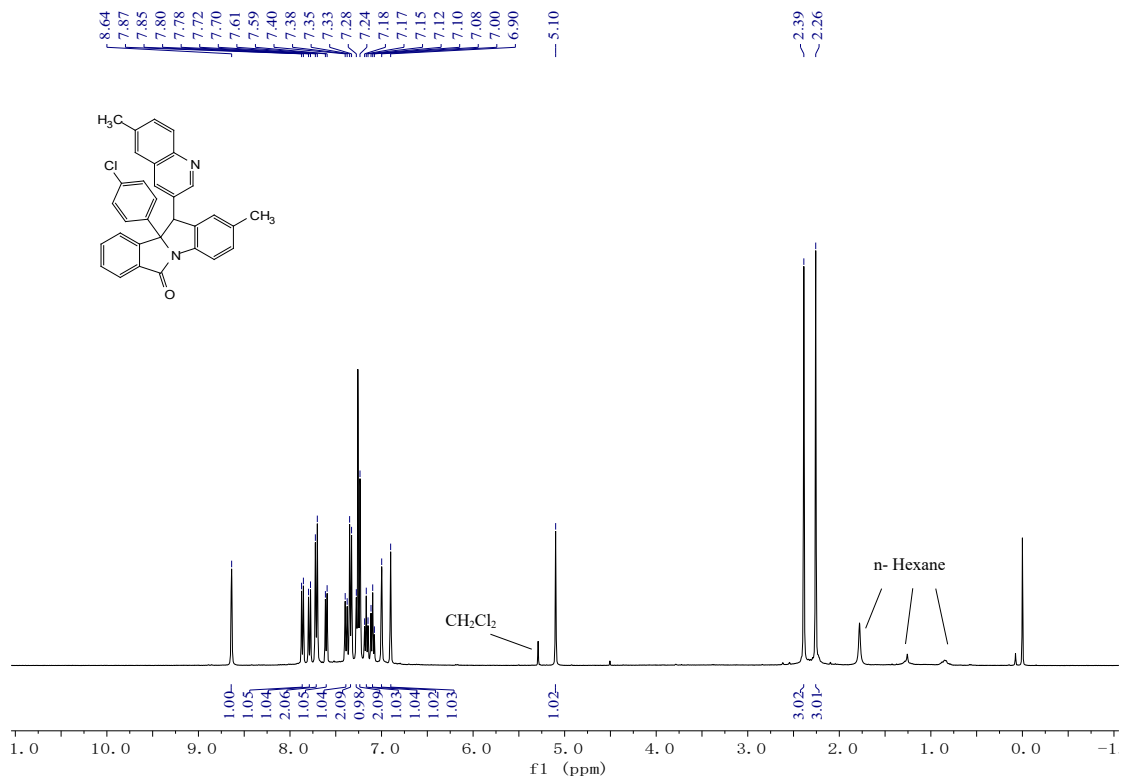

**5o- $^1\text{H}$**

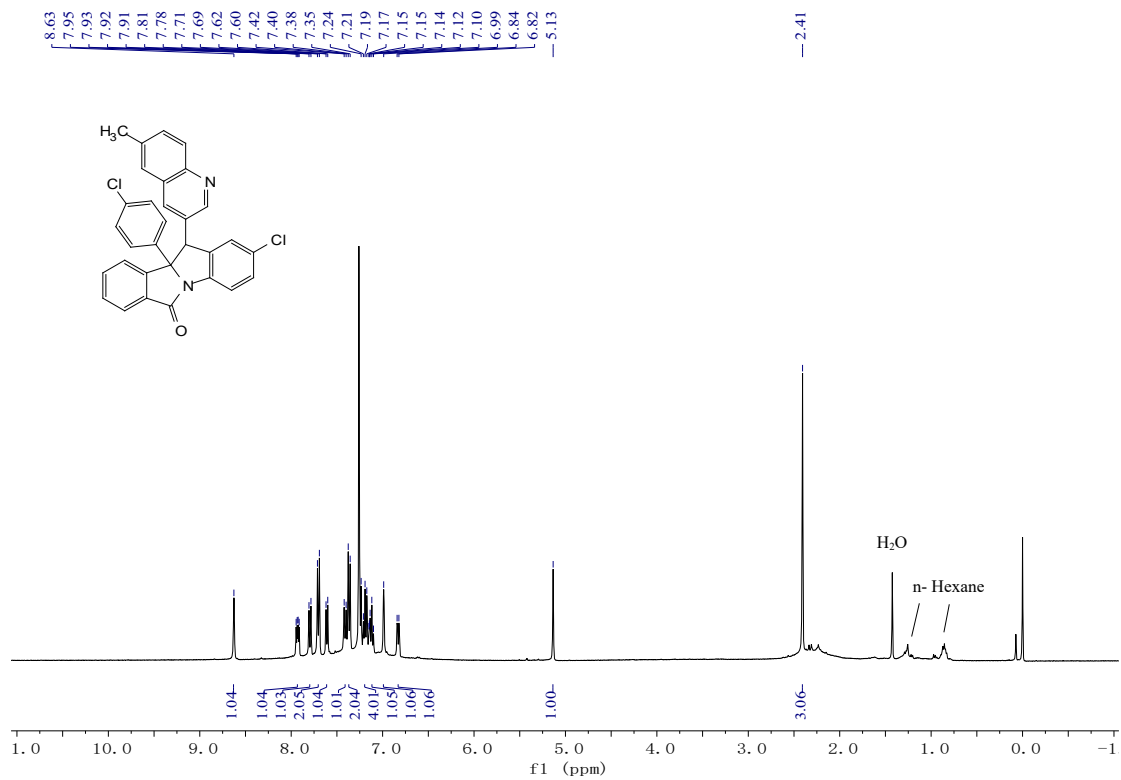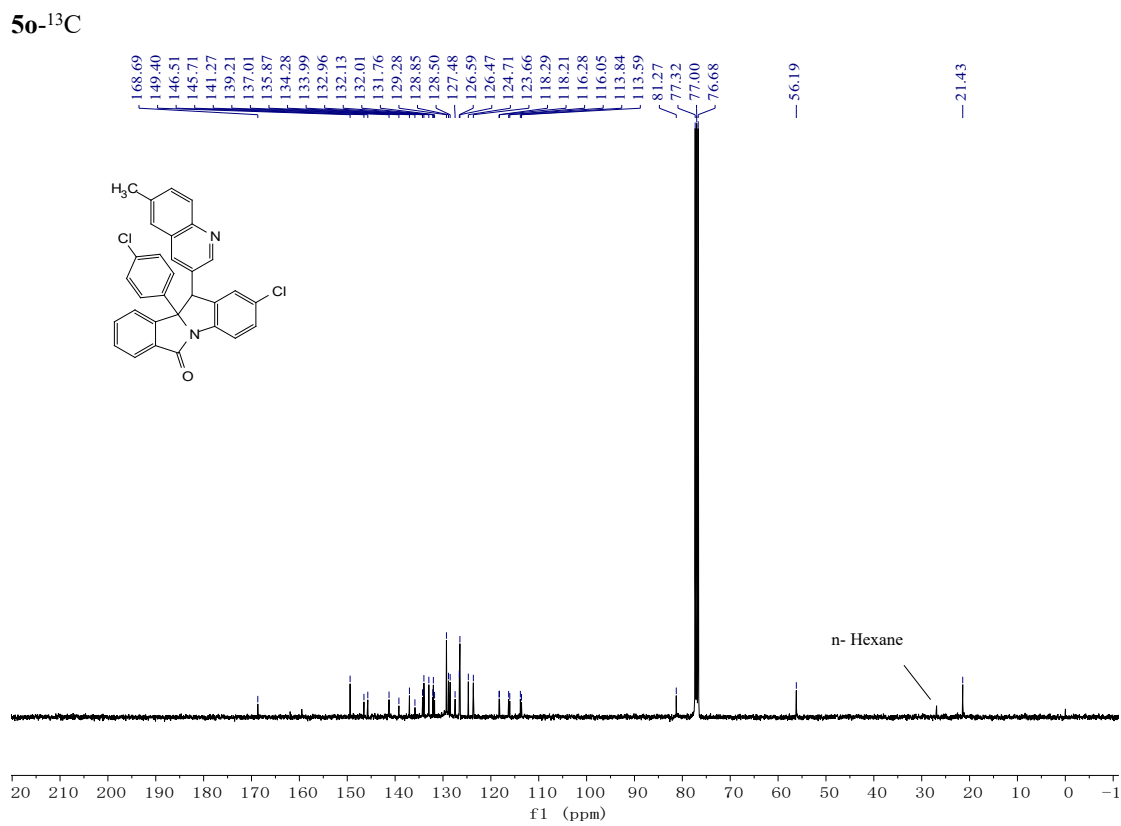

**5p-<sup>1</sup>H**

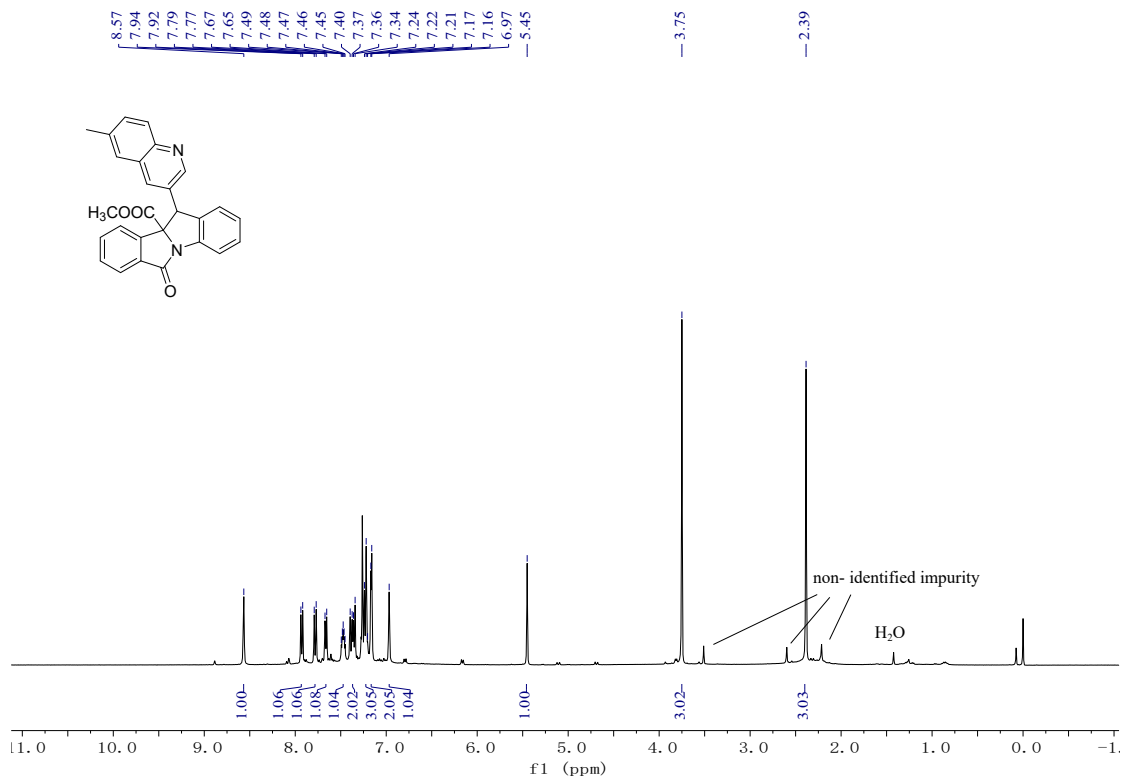

**6a-<sup>1</sup>H**

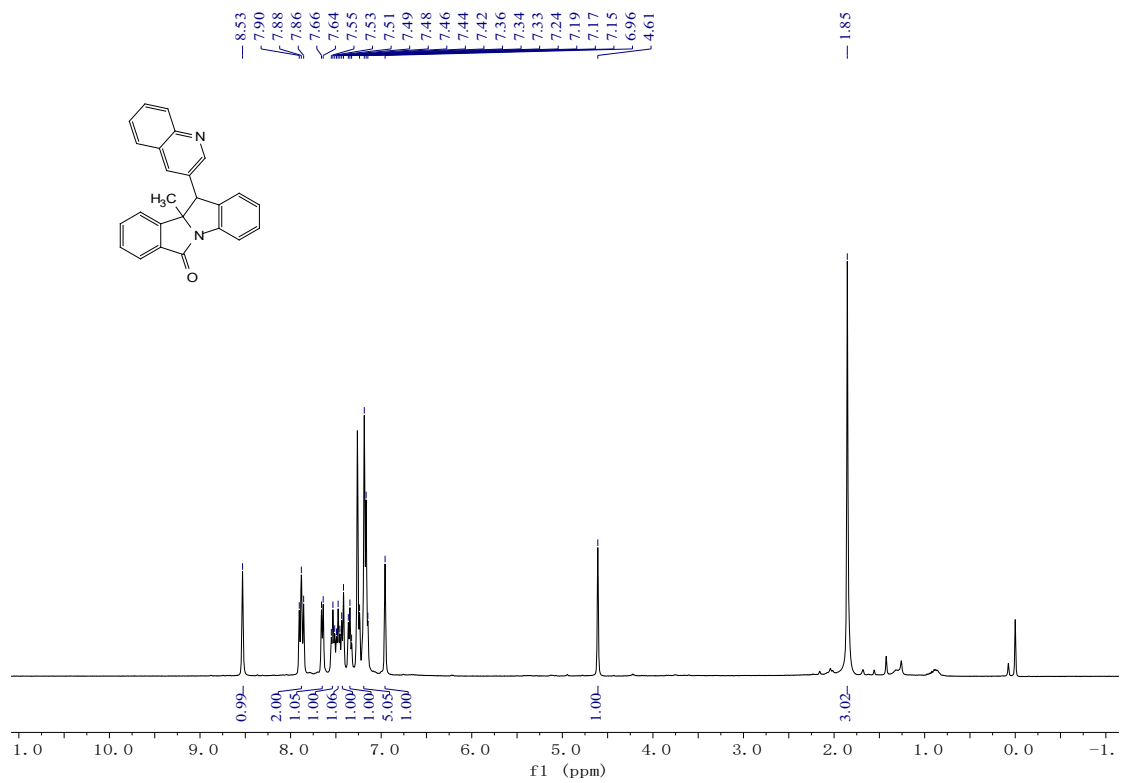

**6a-<sup>13</sup>C**



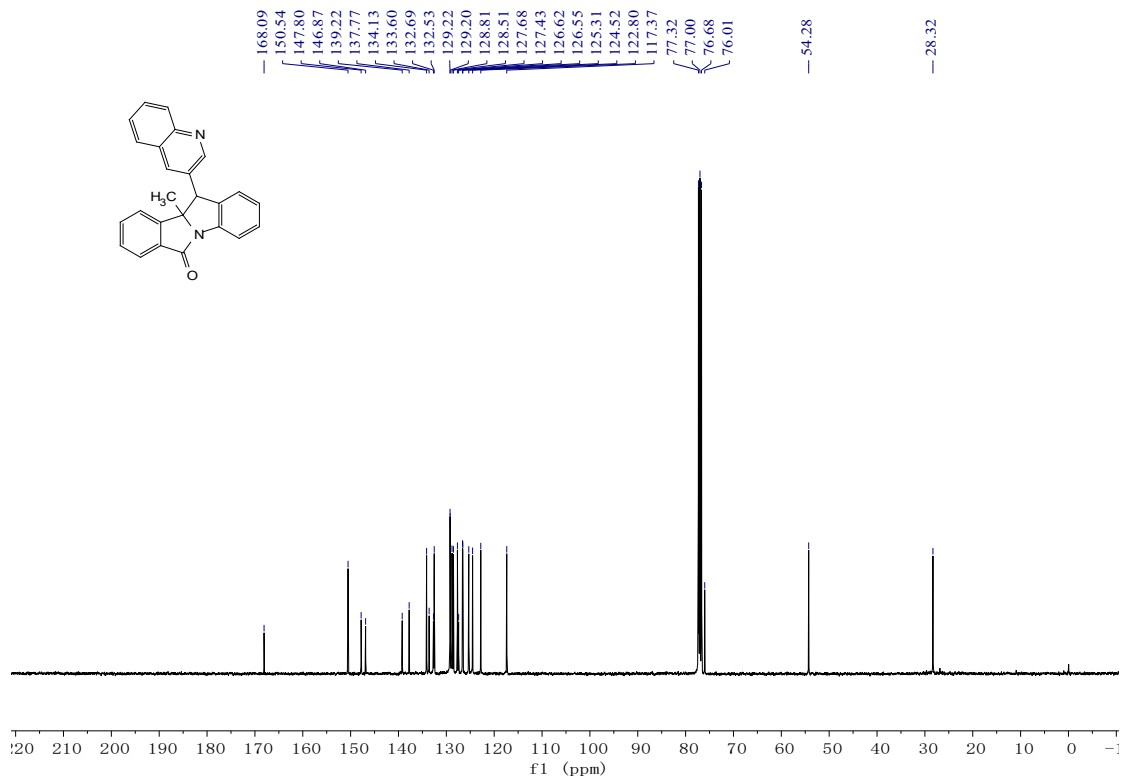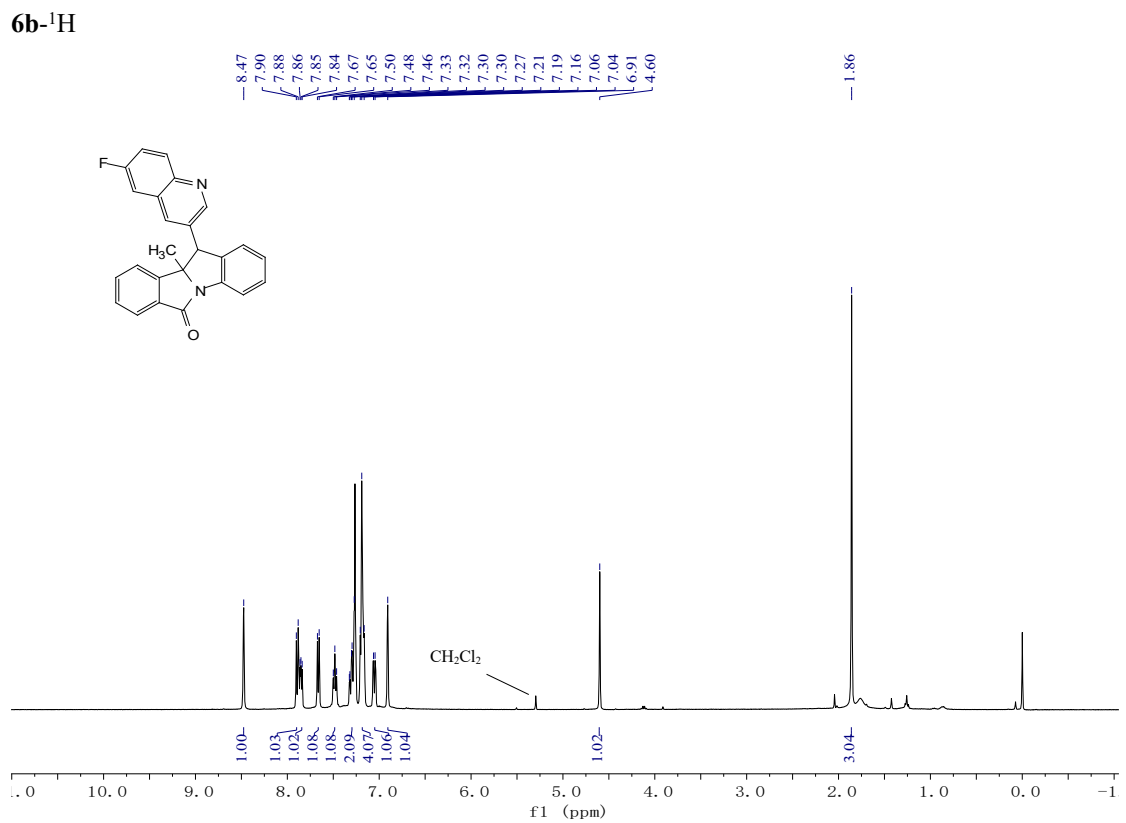

**6b-<sup>13</sup>C**

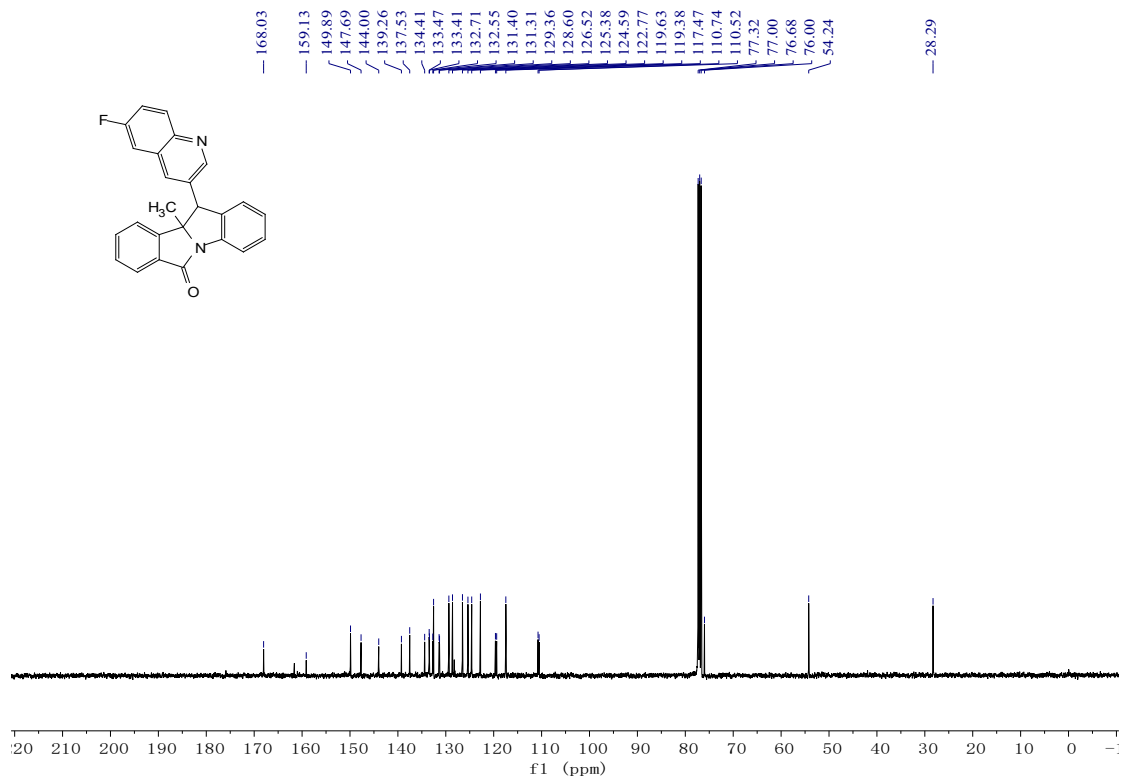

**6c-<sup>1</sup>H**

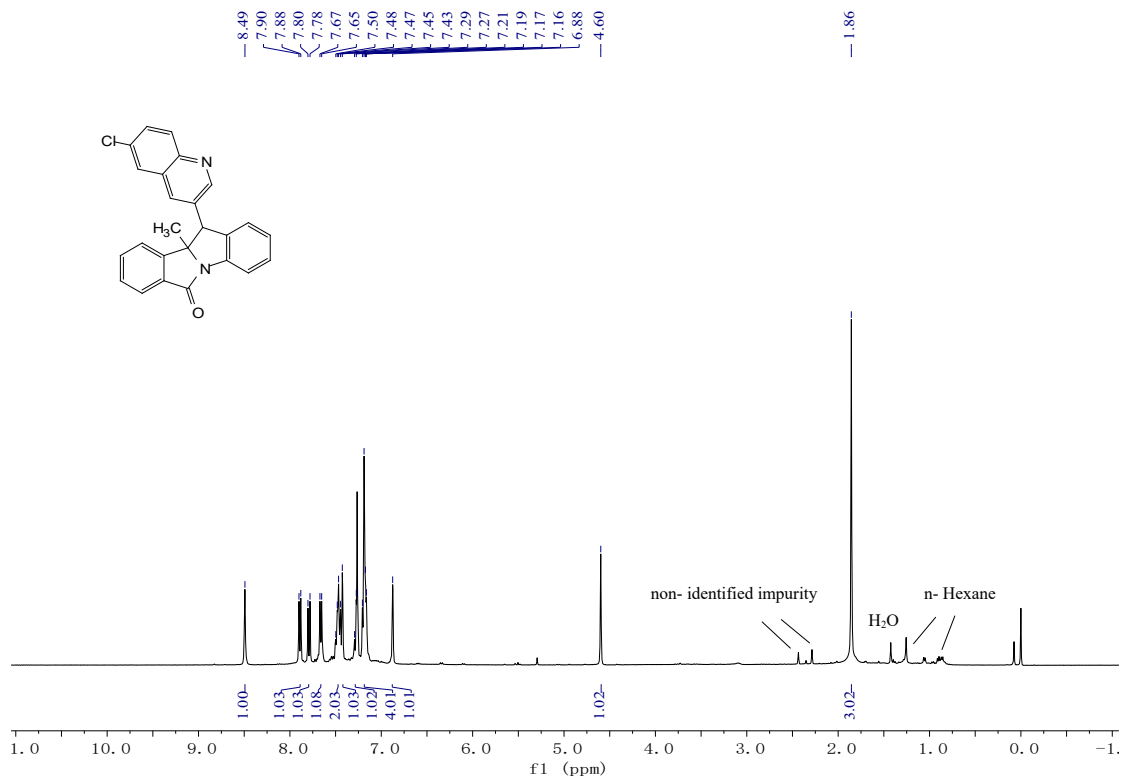

**6c-<sup>13</sup>C**

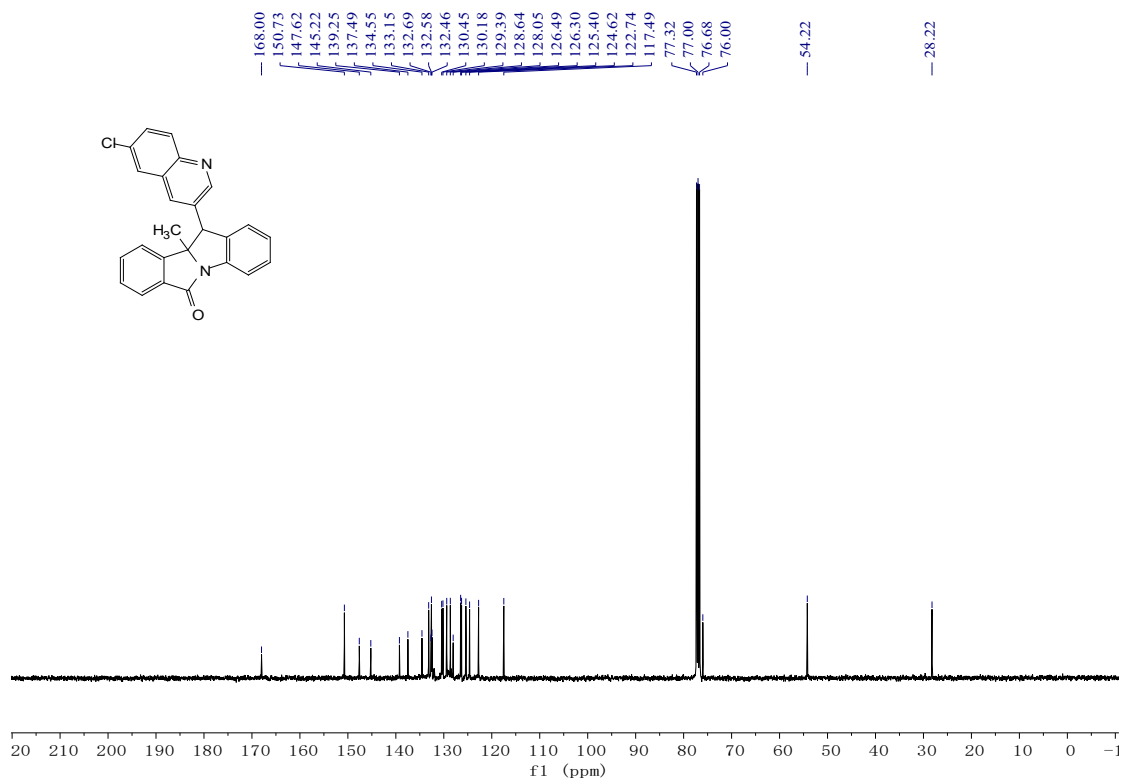

**6d-<sup>1</sup>H**

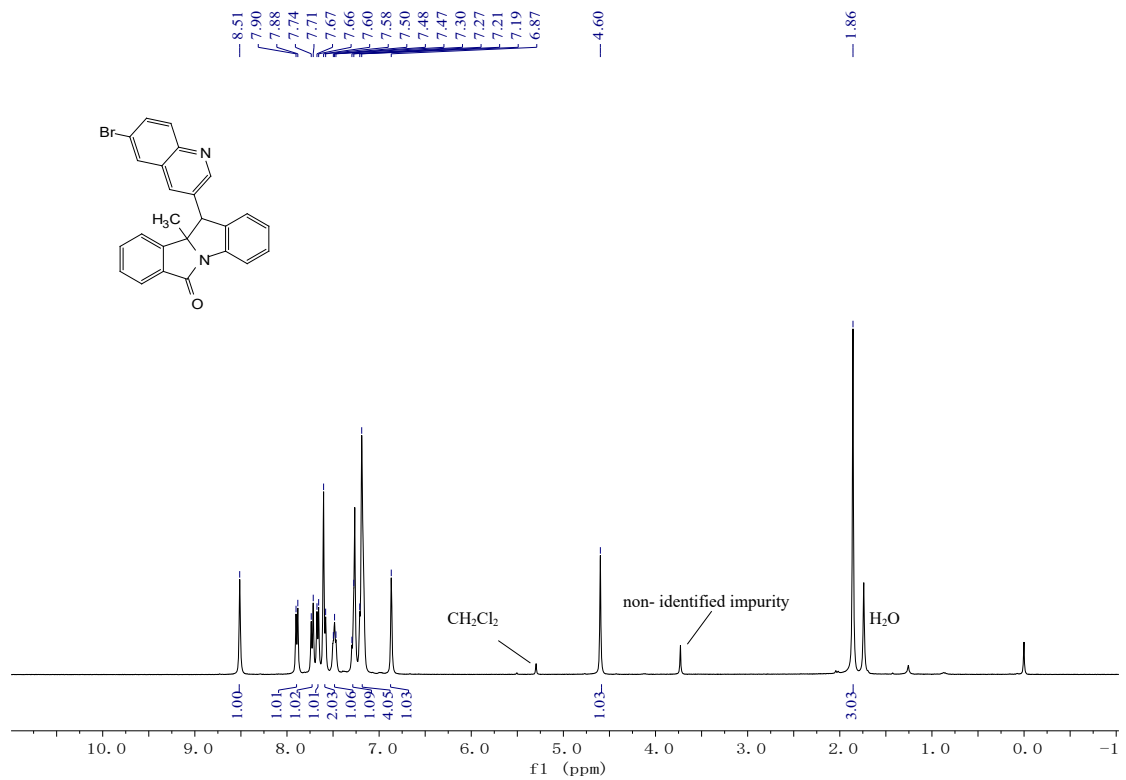

**6d-<sup>13</sup>C**

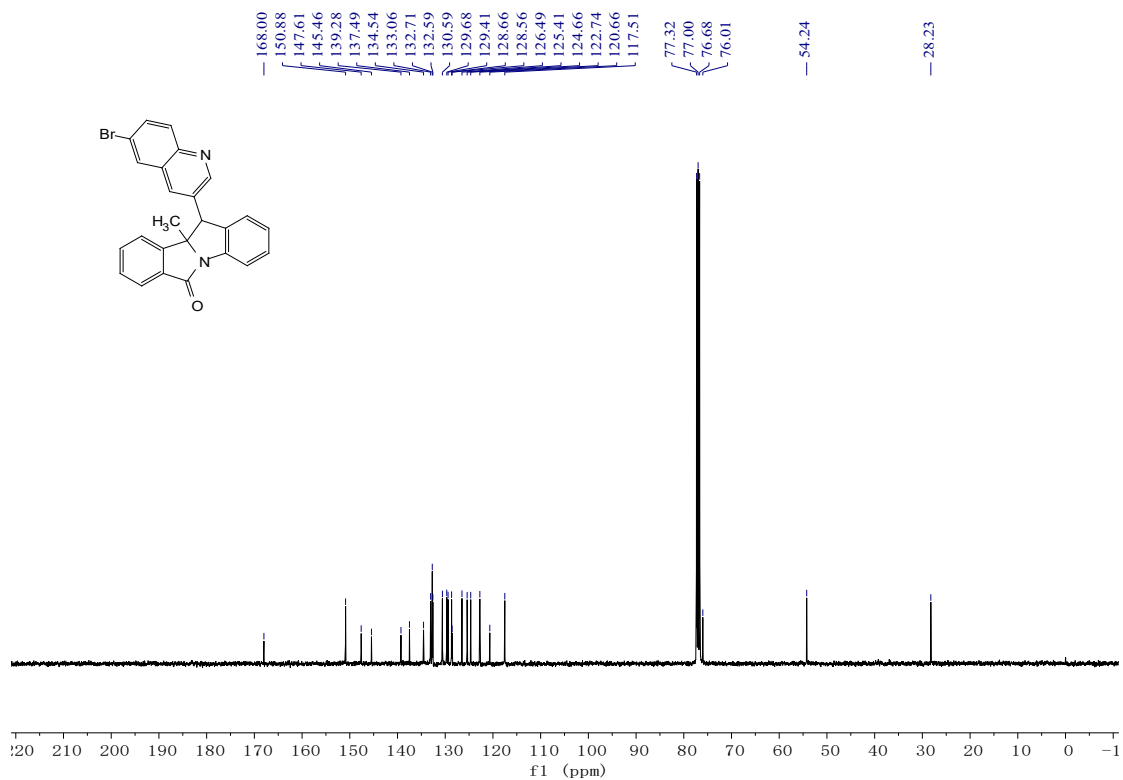

**6e-<sup>1</sup>H**

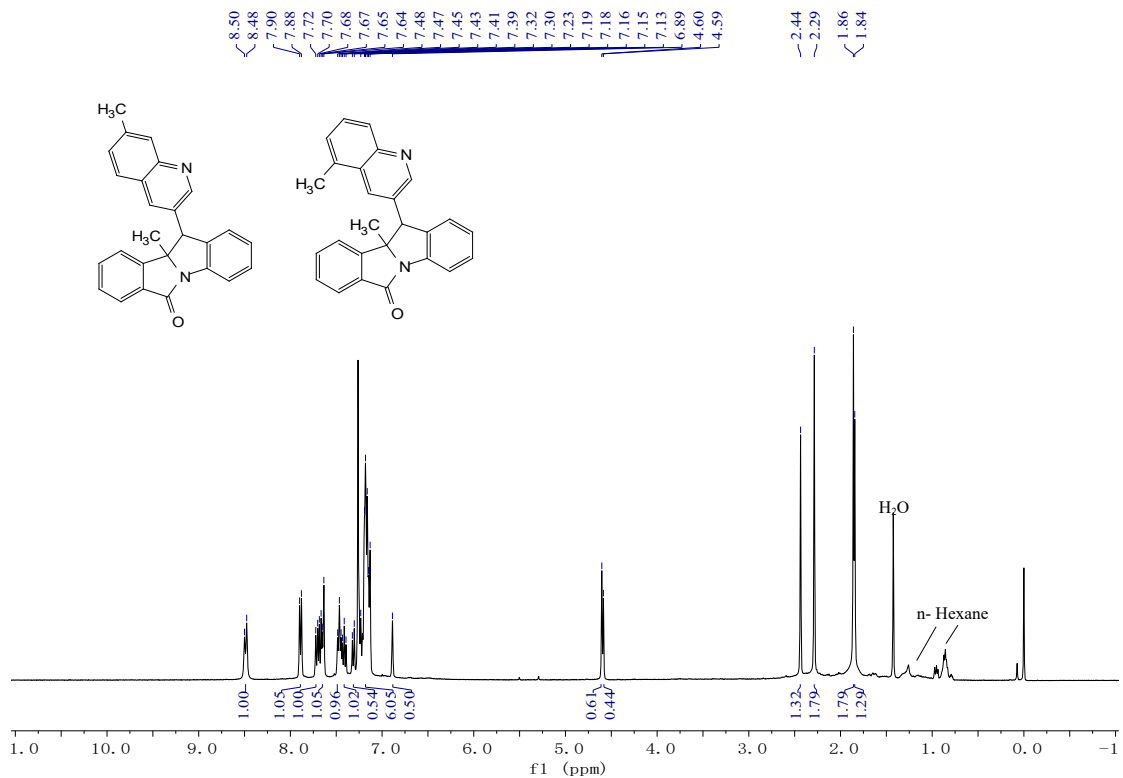

**6e-<sup>13</sup>C**

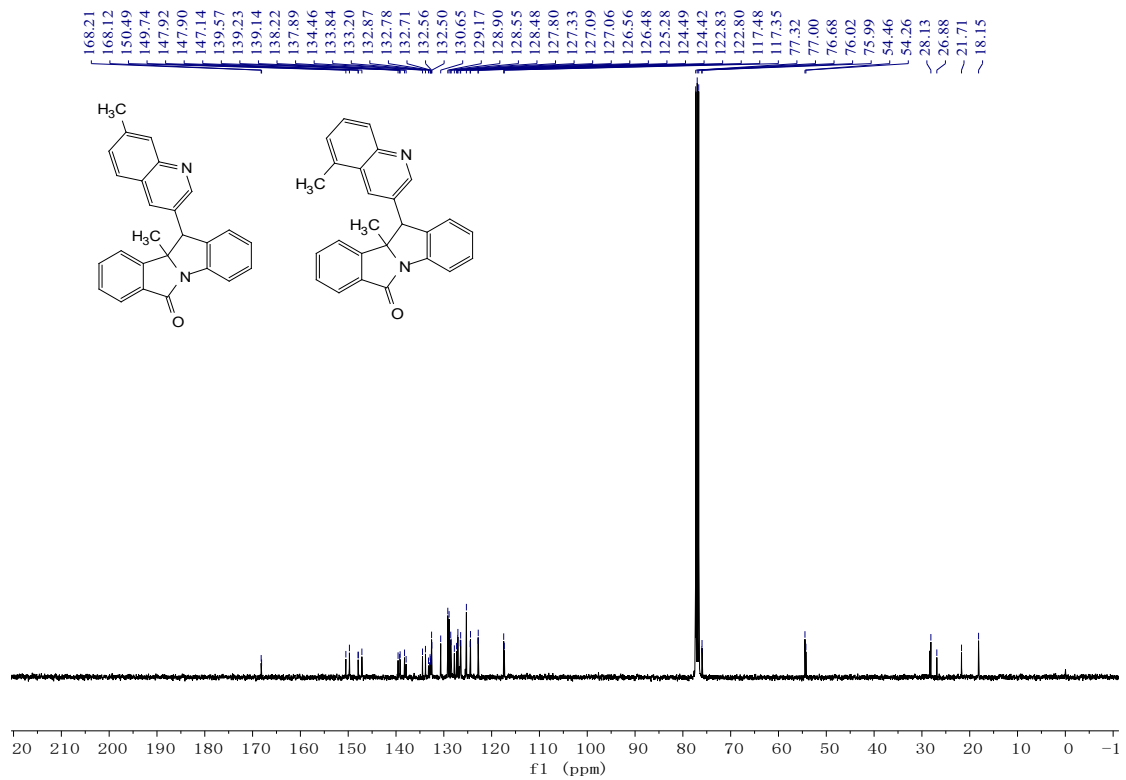

**6f-<sup>1</sup>H**

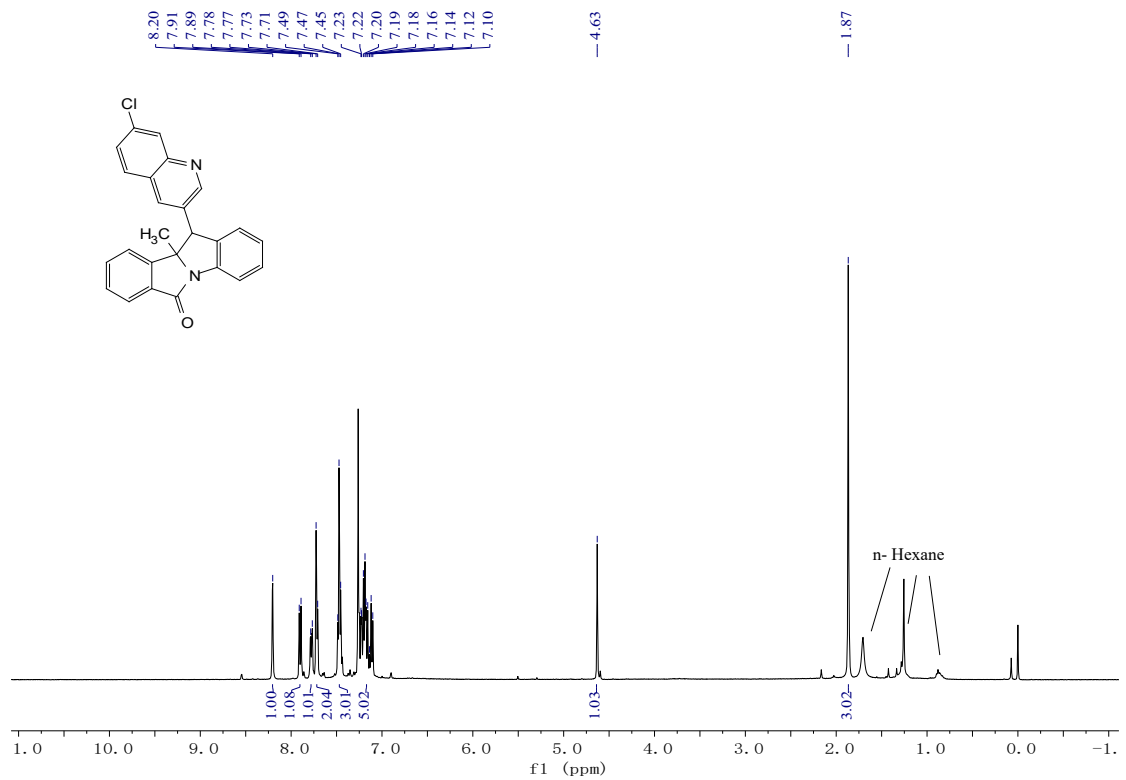

**6f-<sup>13</sup>C**

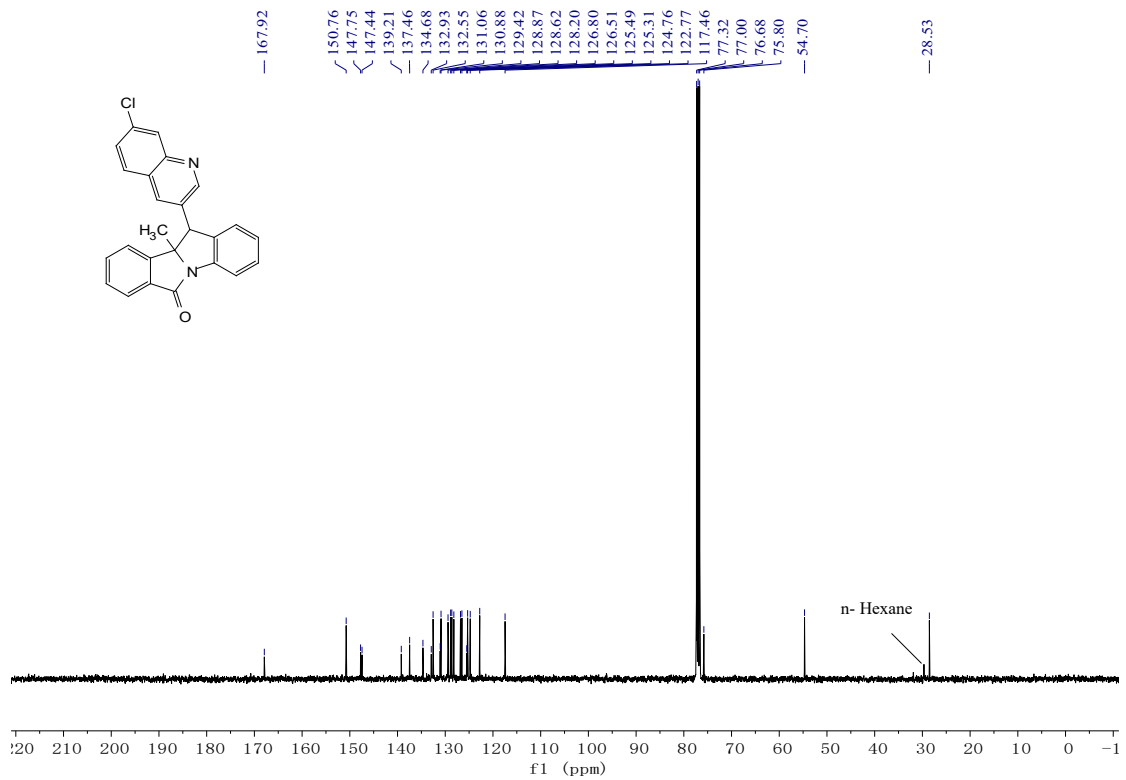

**6g-<sup>1</sup>H**

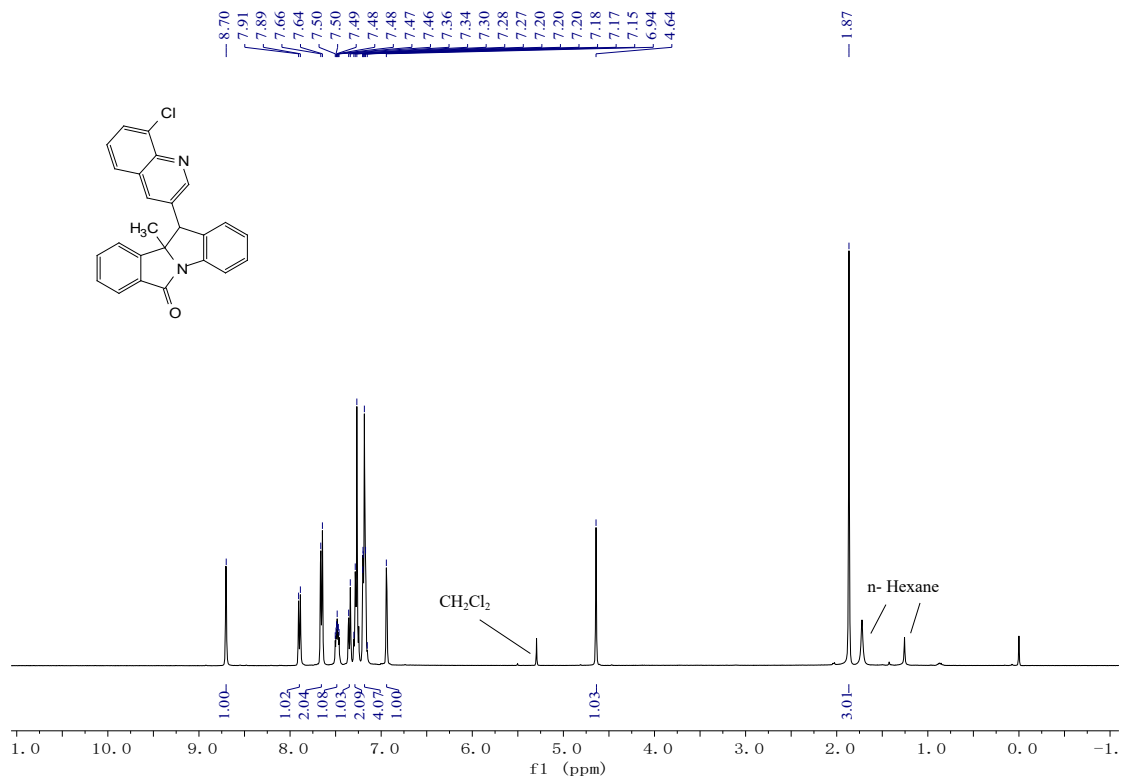

**6g-<sup>13</sup>C**

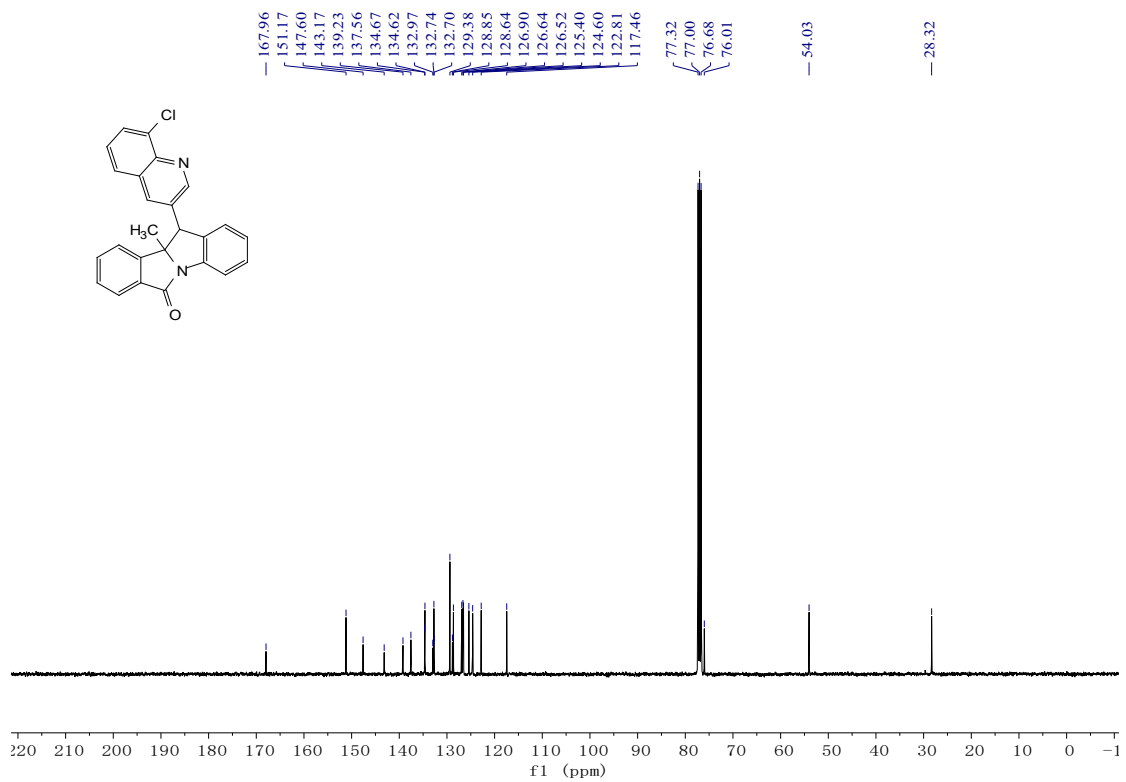

**6h-<sup>1</sup>H**

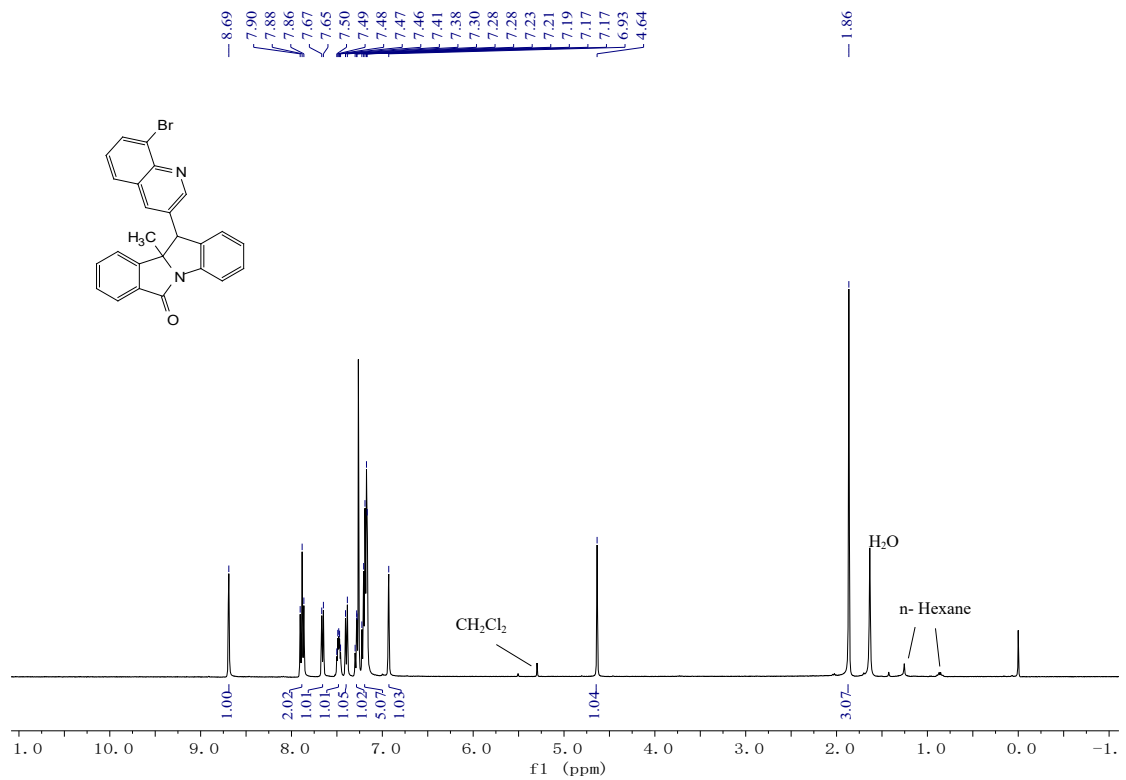

**6h-<sup>13</sup>C**

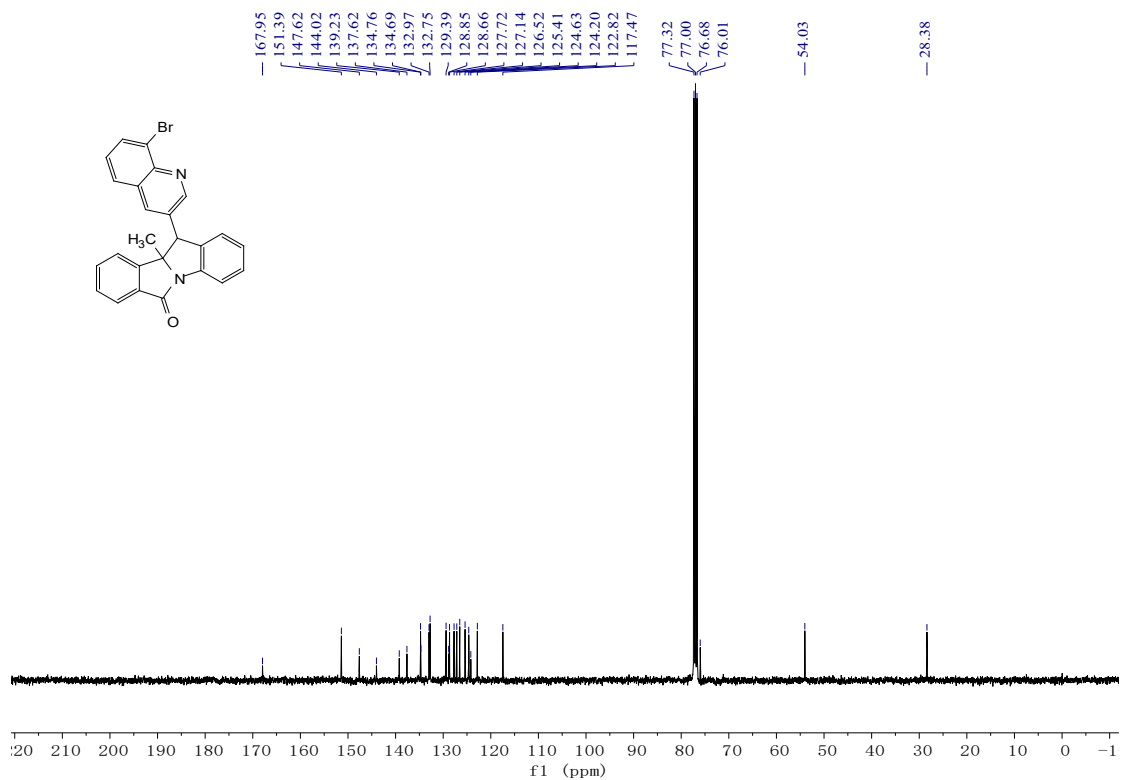

**6i-<sup>1</sup>H**

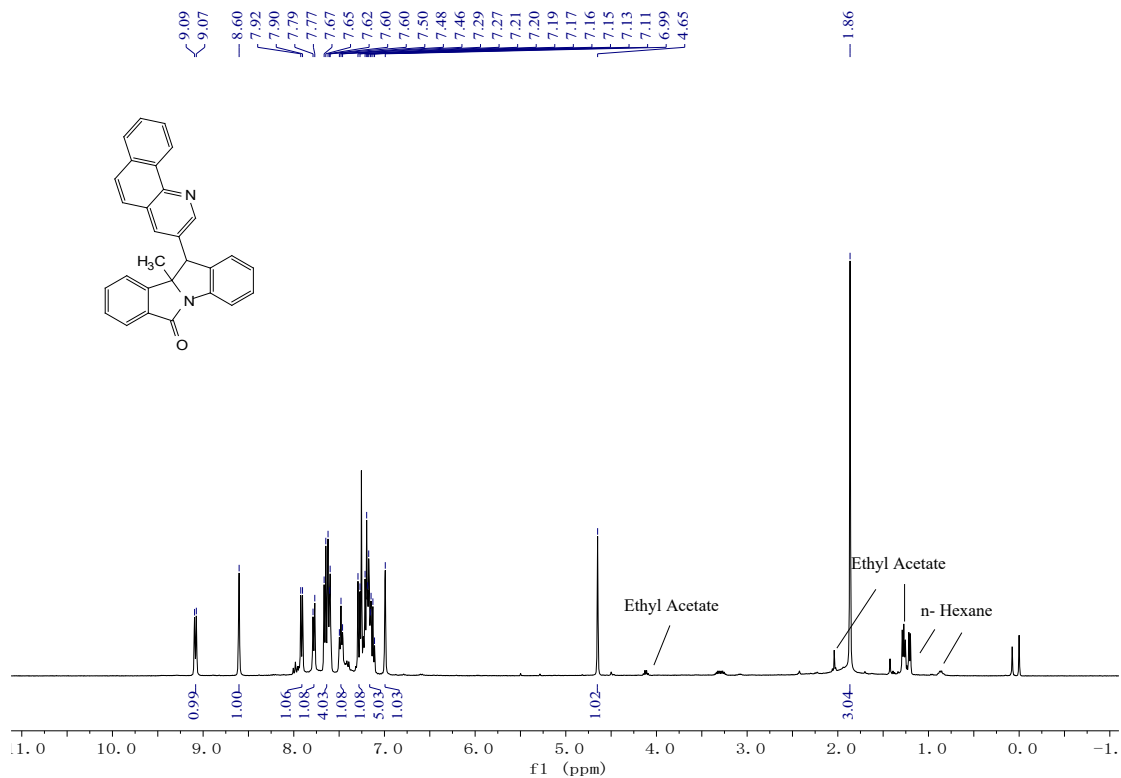

**6i-<sup>13</sup>C**



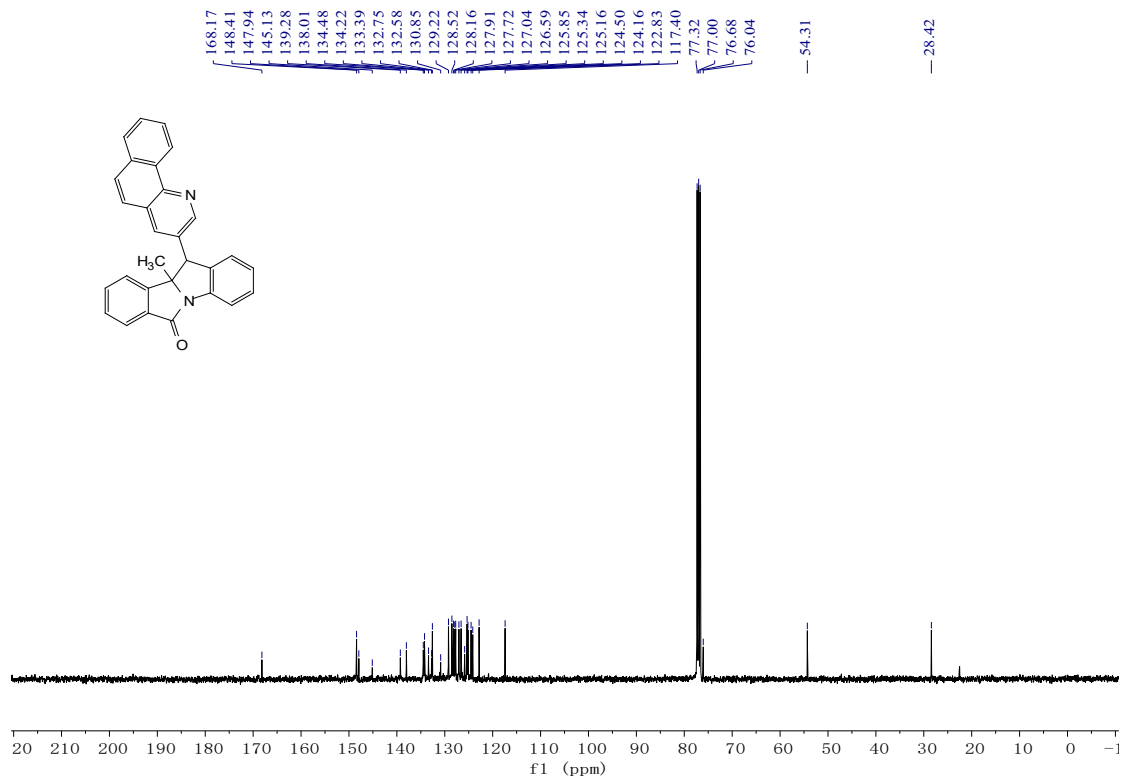

<sup>1</sup>H NMR

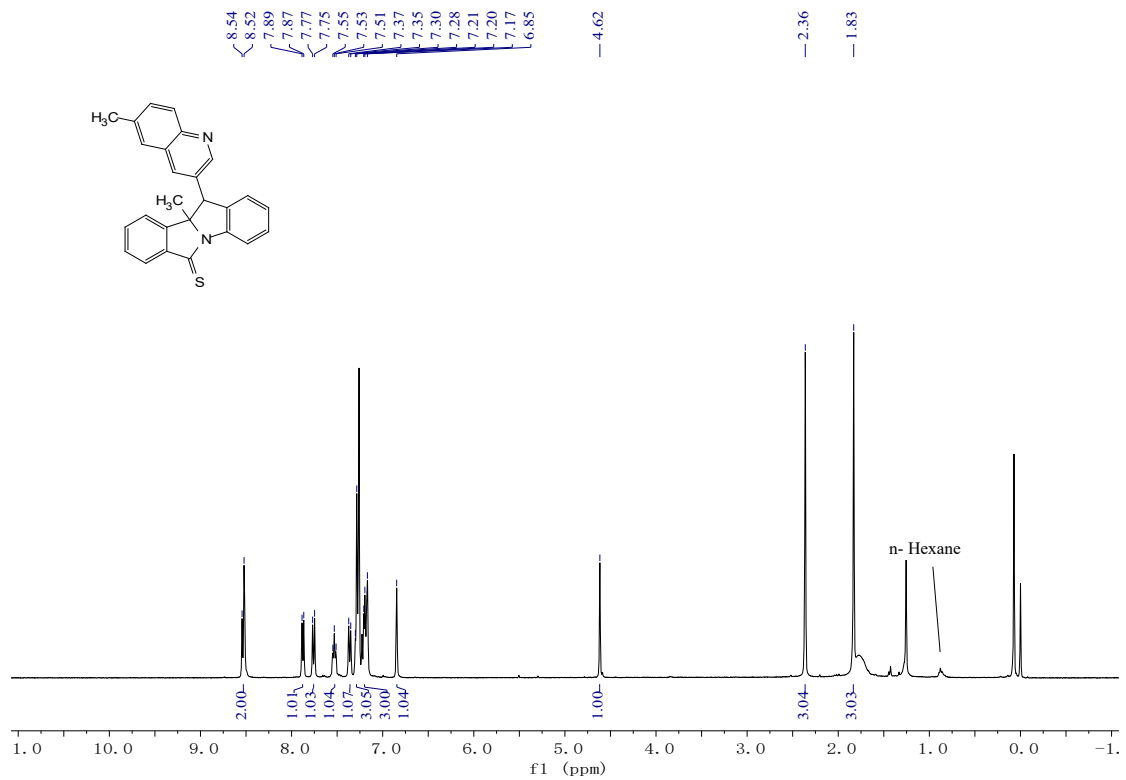

<sup>13</sup>C

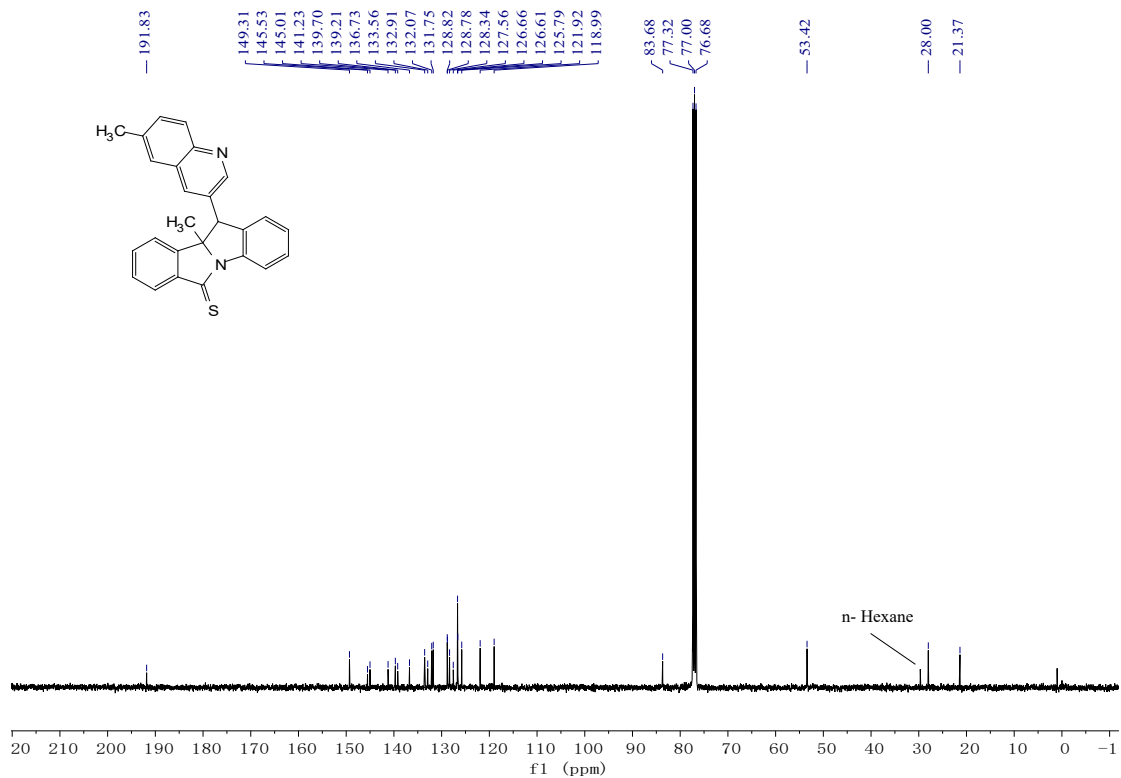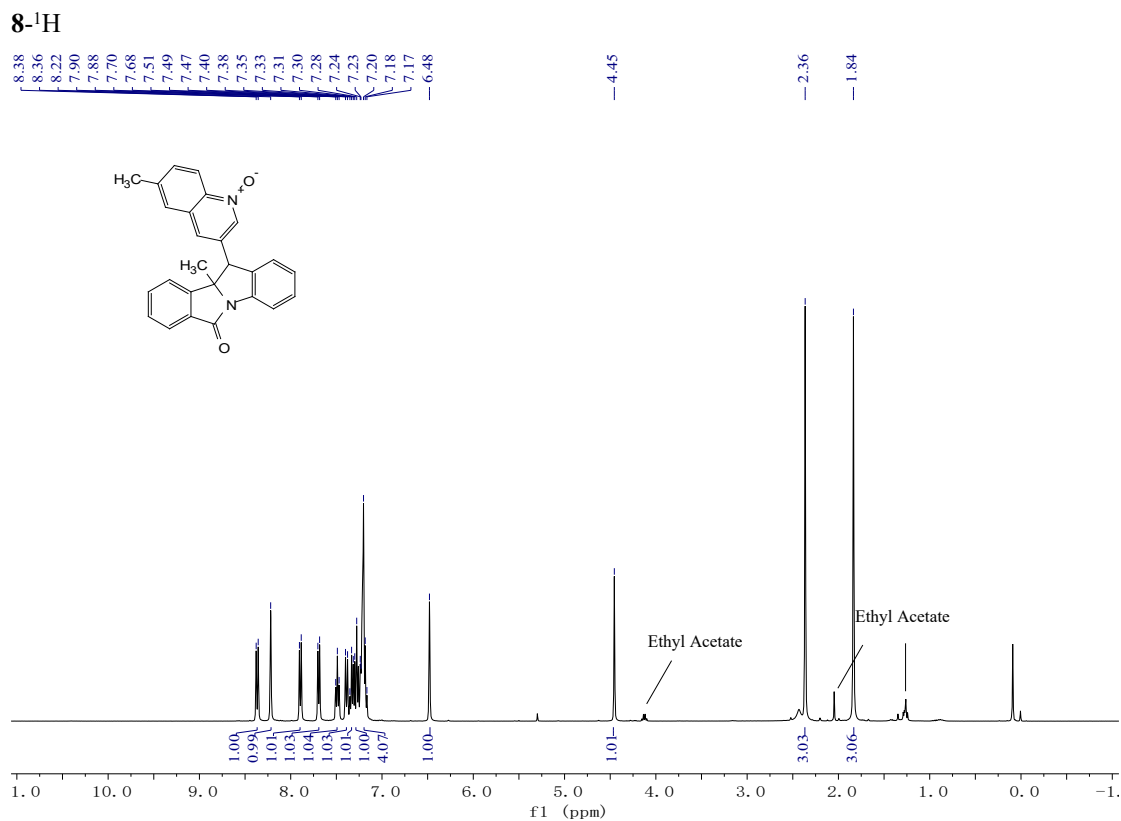

**<sup>13</sup>C**

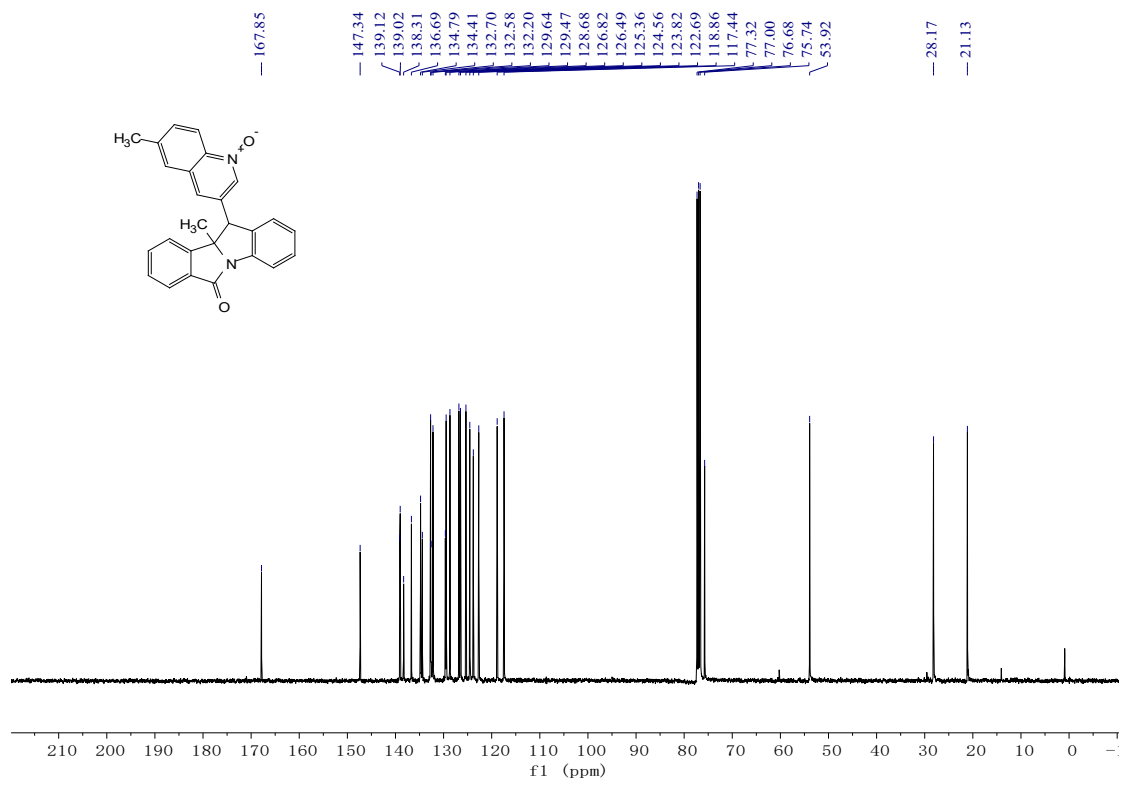

## 8. Computational details

Quantum chemistry calculations were conducted with the Gaussian 09 software package<sup>[3]</sup>. The structures were optimized by the density functional theory (DFT)<sup>[4]</sup> with B3LYP-D3 functional<sup>[5,6]</sup> on basis of def2-SVP<sup>[7]</sup> using SMD<sup>[8]</sup> continuum solvent model (solvent = dichloroethane). Frequency analyses were performed at the same level of theory to verify the stationary points to be real minima or saddle points and to obtain the thermodynamic energy corrections at 383.15K. All transition states were confirmed by intrinsic reaction coordinate (IRC), and calculations were performed to confirm the connection between two correct minima for a transition state. In order to get more accurate electronic energies, the single point energy were calculated at the M06<sup>[9-10]</sup>-D3/def2-TZVP level of theory using SMD continuum solvent model (solvent = dichloroethane).

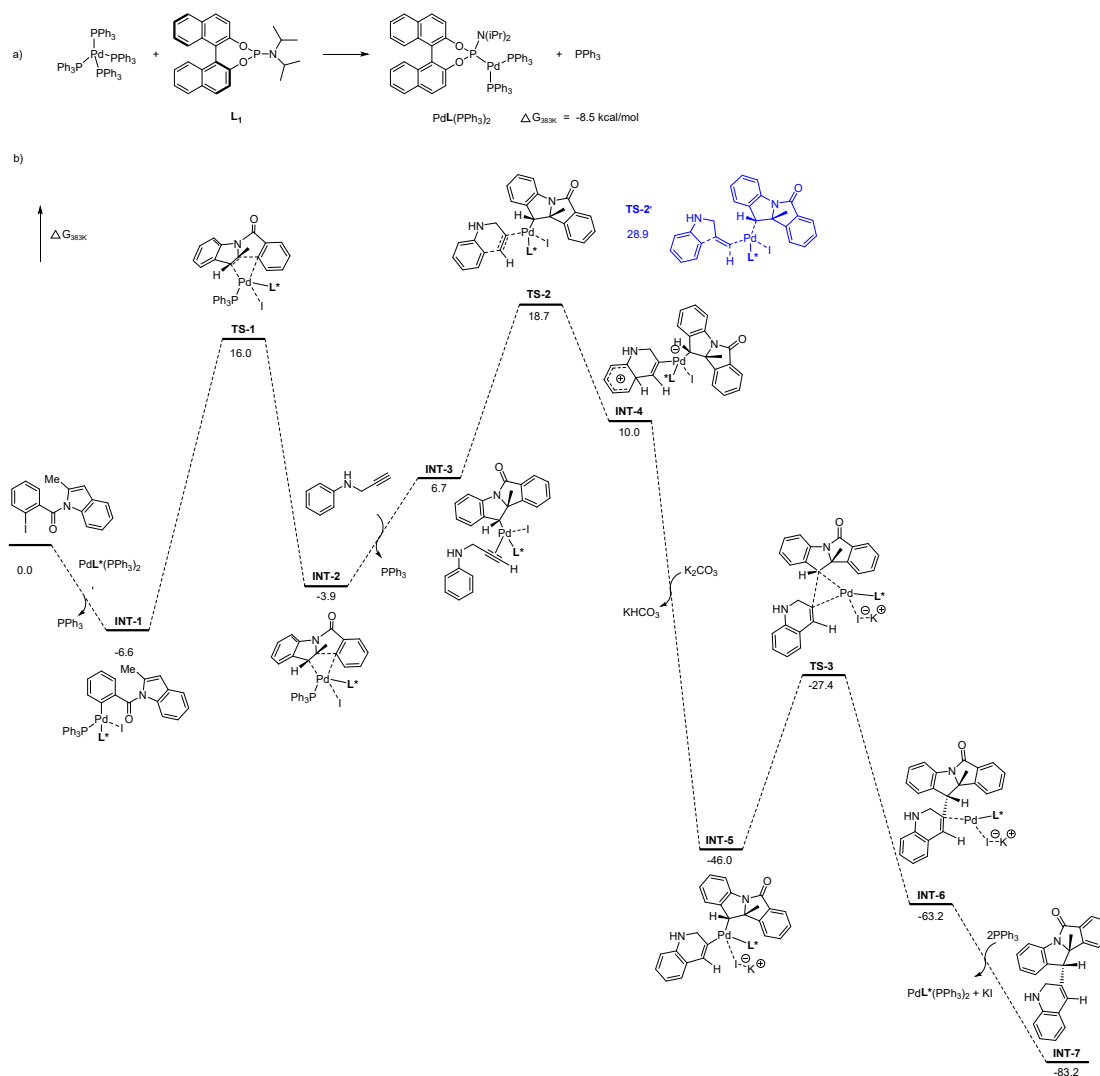

Figure S1 Calculated reaction pathway

**Table S1.** Calculated energy data and imaginary frequencies for all structure

|                                        | Energy (au)             | Thermal correction<br>to Enthalpy ( au ) | Thermal correction<br>to Gibbs Free<br>Energy (au)) | Imaginary<br>frequency (cm <sup>-1</sup> ) |
|----------------------------------------|-------------------------|------------------------------------------|-----------------------------------------------------|--------------------------------------------|
|                                        | M06-D3<br>/def2TZVP/SMD | B3LYP-D3<br>/def2SVP/SMD                 | B3LYP-D3<br>/def2SVP/SMD                            | B3LYP-D3 /<br>def2SVP//SMD                 |
| <b>substrate</b>                       | -1044.428282            | 0.264183                                 | 0.174116                                            | None                                       |
| <b>Pd(PPh<sub>3</sub>)<sub>4</sub></b> | -4272.14401             | 1.216526                                 | 0.942308                                            | None                                       |
| <b>L<sub>1</sub></b>                   | -1552.632762            | 0.503527                                 | 0.380912                                            | None                                       |
| <b>Catalyst</b>                        | -3752.735276            | 1.114176                                 | 0.858949                                            | None                                       |
| <b>INT-1</b>                           | -3761.177861            | 1.078905                                 | 0.832212                                            | None                                       |
| <b>PPh<sub>3</sub></b>                 | -1036.003721            | 0.300462                                 | 0.208347                                            | None                                       |
| <b>TS-1</b>                            | -3761.141568            | 1.077514                                 | 0.831978                                            | -236.01                                    |
| <b>INT-2</b>                           | -3761.174243            | 1.079794                                 | 0.832935                                            | None                                       |
| <b>yne</b>                             | -402.900027             | 0.170418                                 | 0.107278                                            | None                                       |
| <b>INT-3</b>                           | -3128.043866            | 0.947771                                 | 0.722068                                            | None                                       |
| <b>TS-2</b>                            | -3128.029143            | 0.946191                                 | 0.726437                                            | -344.42                                    |
| <b>TS-2'</b>                           | -3128.009342            | 0.945338                                 | 0.722975                                            | -499.68                                    |
| <b>INT-4</b>                           | -3128.04608             | 0.948553                                 | 0.729482                                            | None                                       |
| <b>INT-5</b>                           | -3727.489101            | 0.939955                                 | 0.710301                                            | None                                       |
| <b>K<sub>2</sub>CO<sub>3</sub></b>     | -1463.758711            | 0.026213                                 | -0.027584                                           | None                                       |
| <b>KHCO<sub>3</sub></b>                | -864.399108             | 0.036756                                 | -0.01419                                            | None                                       |
| <b>TS-3</b>                            | -3727.461788            | 0.938817                                 | 0.712696                                            | -307.95                                    |
| <b>INT-6</b>                           | -3727.527657            | 0.942122                                 | 0.721447                                            | None                                       |
| <b>INT-7</b>                           | -1149.054173            | 0.424775                                 | 0.314553                                            | None                                       |
| <b>KI</b>                              | -897.7785               | 0.005478                                 | -0.034317                                           | None                                       |
| <b>Product</b>                         | -1147.866064            | 0.400873                                 | 0.294911                                            | None                                       |
| <b>H<sub>2</sub></b>                   | -1.169854               | 0.014181                                 | -0.005953                                           | None                                       |

**Reference:**

[3]. Frisch, M. J. *et al. Gaussian 09, Revision D.01* (Gaussian, Inc.: Wallingford, CT, 2009).

[4]. Hohenberg, P.; Kohn, W. *Phys. Rev.* **1964**, 136(3B), 864

[5]. Becke, A. D. *J. Chem. Phys.* **1993**, 98, 5648

- [6]. Grimme, S., Ehrlich, S., Goerigk, L. *J. Comput. Chem.* **2011**, 32, 1456
- [7]. Weigend, F.; Ahlrichs, R. *Phys. Chem. Chem. Phys.* **2005**, 7, 3297
- [8]. Marenich, A. V.; Cramer, C. J.; Truhlar, D. G. *J. Phys. Chem. B* **2009**, 113, 6378
- [9]. Zhao, Y.; Truhlar, D. G. *Acc. Chem. Res.* **2008**, 41, 157
- [10]. Marenich, A. V; Cramer, C. J.; Truhlar, D. G. *J. Phys. Chem. B.* **2009**, 113, 6378

## Structure and Coordinations

Substrate

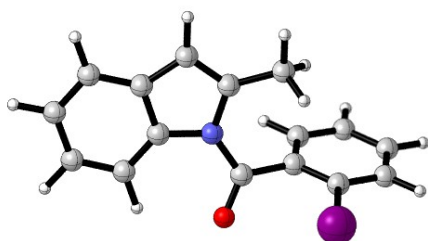

|   |             |             |             |
|---|-------------|-------------|-------------|
| C | 3.04213600  | 2.73370300  | -0.57917600 |
| C | 1.76814000  | 3.20890700  | -0.90378800 |
| C | 0.68491800  | 2.32954300  | -0.91401700 |
| C | 0.86235700  | 0.96819800  | -0.61633300 |
| C | 2.14733200  | 0.50288400  | -0.29659100 |
| C | 3.23403200  | 1.38350200  | -0.26865100 |
| C | -0.32875300 | 0.06328500  | -0.77828600 |
| N | -1.41876000 | 0.26734800  | 0.07594700  |
| C | -1.42652600 | 0.82770600  | 1.38453700  |
| C | -2.73869600 | -0.12477500 | -0.24453800 |
| C | -3.56571300 | 0.23198200  | 0.85110700  |
| C | -2.70923700 | 0.81179900  | 1.85467200  |
| C | -3.26532300 | -0.71777000 | -1.39823700 |
| C | -4.64408200 | -0.94814100 | -1.43580400 |
| C | -5.47740000 | -0.60227800 | -0.35523300 |
| C | -4.94747600 | -0.01116900 | 0.79185600  |
| C | -0.20640800 | 1.25314500  | 2.13465300  |
| O | -0.37311200 | -0.74469100 | -1.68420100 |
| H | 3.89686600  | 3.41458500  | -0.56080200 |

|   |             |             |             |
|---|-------------|-------------|-------------|
| H | 1.61650000  | 4.26362200  | -1.14466600 |
| H | -0.31777600 | 2.69248900  | -1.15442000 |
| H | 4.22835100  | 1.02081300  | -0.00142000 |
| H | -3.01051500 | 1.15629100  | 2.84277500  |
| H | -2.62386600 | -1.00076900 | -2.22956200 |
| H | -5.07899400 | -1.41413500 | -2.32390900 |
| H | -6.55047600 | -0.80183700 | -0.41718000 |
| H | -5.59091800 | 0.26164000  | 1.63227400  |
| H | -0.48738500 | 1.43318700  | 3.18200000  |
| H | 0.57444500  | 0.47730400  | 2.11634400  |
| H | 0.24049100  | 2.17723300  | 1.73922400  |
| I | 2.48007000  | -1.52938600 | 0.26234500  |

Pd(PPh<sub>3</sub>)<sub>4</sub>

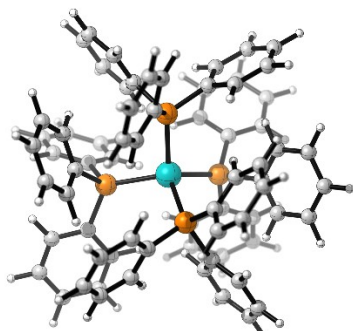

|    |             |             |             |
|----|-------------|-------------|-------------|
| Pd | -0.00189300 | -0.00215600 | -0.15120600 |
| P  | -2.17808800 | -0.16052800 | -1.27825500 |
| P  | 0.31712500  | -2.09198100 | 1.12889200  |
| C  | -3.53964900 | 0.12092300  | -0.05060700 |
| C  | -4.02341500 | 1.40653000  | 0.24975700  |
| C  | -4.94291000 | 1.60206300  | 1.28525600  |
| C  | -5.39959800 | 0.51820400  | 2.04045900  |
| C  | -4.92630700 | -0.76600400 | 1.74964400  |
| C  | -4.00330100 | -0.96206600 | 0.72017500  |
| C  | -2.59626300 | 1.00483800  | -2.67498400 |
| C  | -1.54470100 | 1.40606000  | -3.51248000 |
| C  | -1.77338000 | 2.24382500  | -4.60839500 |
| C  | -3.06783700 | 2.69730300  | -4.88214600 |
| C  | -4.12851600 | 2.29095000  | -4.06350700 |
| C  | -3.89722300 | 1.44464800  | -2.97459500 |
| C  | -2.77522800 | -1.71499900 | -2.12877500 |
| C  | -1.82240900 | -2.57484100 | -2.68947800 |
| C  | -2.20385800 | -3.71535300 | -3.40424500 |

|   |             |             |             |
|---|-------------|-------------|-------------|
| C | -3.55897900 | -4.01766500 | -3.56193900 |
| C | -4.52384600 | -3.16448000 | -3.01064500 |
| C | -4.13723800 | -2.02053300 | -2.30742900 |
| C | -1.65238300 | -4.00688600 | 0.41433500  |
| C | -2.85144300 | -4.71033100 | 0.55959600  |
| C | -3.61406900 | -4.57616200 | 1.72507600  |
| C | -3.16424900 | -3.72621100 | 2.74041900  |
| C | -1.97352500 | -3.00950500 | 2.58789500  |
| C | -1.19269700 | -3.14110100 | 1.42407100  |
| C | 1.43078800  | -3.35484500 | 0.32280300  |
| C | 1.43697400  | -3.40047700 | -1.07909200 |
| C | 2.24775000  | -4.29952200 | -1.77656700 |
| C | 3.08929000  | -5.16609100 | -1.07244700 |
| C | 3.10096800  | -5.12661800 | 0.32682000  |
| C | 2.27659600  | -4.23399800 | 1.01991000  |
| C | 1.06358200  | -1.96674400 | 2.82370500  |
| C | 1.82842000  | -0.82490200 | 3.10368500  |
| C | 2.47064600  | -0.67529800 | 4.33723500  |
| C | 2.34243500  | -1.66073300 | 5.31958600  |
| C | 1.58079900  | -2.80512700 | 5.05448200  |
| C | 0.95235600  | -2.96033100 | 3.81591700  |
| P | 2.16274600  | 0.28849500  | -1.28994100 |
| P | -0.29266000 | 1.95318000  | 1.33104500  |
| C | 3.54384100  | -0.16004100 | -0.13678400 |
| C | 4.09512800  | -1.45188200 | -0.08040300 |
| C | 5.03848700  | -1.78480800 | 0.89786000  |
| C | 5.45586600  | -0.83443700 | 1.83361600  |
| C | 4.91616100  | 0.45574200  | 1.78535200  |
| C | 3.96644800  | 0.78583900  | 0.81688600  |
| C | 2.56431300  | -0.67156400 | -2.83824900 |
| C | 1.49925100  | -1.08414100 | -3.65124900 |
| C | 1.73018000  | -1.76383200 | -4.85206800 |
| C | 3.03977400  | -2.04264800 | -5.25523800 |
| C | 4.11282700  | -1.62336500 | -4.45827500 |
| C | 3.87800600  | -0.93588100 | -3.26423900 |
| C | 2.73131000  | 1.95255200  | -1.92519600 |
| C | 4.07269700  | 2.37456900  | -1.94124100 |
| C | 4.42033900  | 3.62179800  | -2.46886800 |
| C | 3.43840100  | 4.46434400  | -3.00421000 |
| C | 2.10516600  | 4.04339300  | -3.01763000 |
| C | 1.76199200  | 2.79920600  | -2.48044900 |
| C | 1.72045100  | 3.89370100  | 0.85279800  |
| C | 2.92574500  | 4.55871600  | 1.09504700  |
| C | 3.65919600  | 4.29319900  | 2.25692500  |



|   |             |             |             |
|---|-------------|-------------|-------------|
| C | 3.17222300  | 3.35535500  | 3.17315000  |
| C | 1.97162500  | 2.68277100  | 2.92614100  |
| C | 1.22328100  | 2.94213200  | 1.76284200  |
| C | -1.37276200 | 3.31218800  | 0.64414300  |
| C | -1.36114700 | 3.49192500  | -0.74682200 |
| C | -2.16062400 | 4.45723100  | -1.36406500 |
| C | -3.00406900 | 5.25975900  | -0.59002300 |
| C | -3.02752600 | 5.09202300  | 0.79979000  |
| C | -2.21731600 | 4.13094100  | 1.41333900  |
| C | -1.06945900 | 1.65574600  | 2.98980400  |
| C | -1.82307800 | 0.48297300  | 3.14168900  |
| C | -2.48763200 | 0.20706000  | 4.34102300  |
| C | -2.39640600 | 1.09694300  | 5.41437700  |
| C | -1.64519200 | 2.27065500  | 5.27772000  |
| C | -0.99028300 | 2.55005000  | 4.07519800  |
| H | -1.07778500 | -4.13459500 | -0.50328700 |
| H | -3.18934400 | -5.36595500 | -0.24728200 |
| H | -4.55039200 | -5.12833500 | 1.84005400  |
| H | -3.74642200 | -3.61022100 | 3.65860900  |
| H | -1.65353400 | -2.34638100 | 3.39106800  |
| H | -1.89657900 | -0.21467700 | 2.30659300  |
| H | -3.07855300 | -0.70719900 | 4.43218000  |
| H | -2.90986500 | 0.87986100  | 6.35500400  |
| H | -1.57073900 | 2.97504100  | 6.11079100  |
| H | -0.41544600 | 3.47384700  | 3.98547300  |
| H | -3.68615700 | 2.26756600  | -0.32457900 |
| H | -5.29663600 | 2.61333700  | 1.50202400  |
| H | -6.11499500 | 0.67237800  | 2.85246700  |
| H | -5.26672600 | -1.62515300 | 2.33274600  |
| H | -3.64133100 | -1.97046600 | 0.51970900  |
| H | -4.74031800 | 1.13345300  | -2.35501900 |
| H | -5.14535100 | 2.63311000  | -4.27490000 |
| H | -3.25155600 | 3.36125300  | -5.73107000 |
| H | -0.93488100 | 2.54778100  | -5.24097300 |
| H | -0.53109300 | 1.06628900  | -3.29526500 |
| H | 1.93151800  | -0.05062200 | 2.34260700  |
| H | 3.07072700  | 0.21754500  | 4.52833600  |
| H | 2.83567100  | -1.54112800 | 6.28801900  |
| H | 1.47890500  | -3.58481800 | 5.81437800  |
| H | 0.37359600  | -3.86609000 | 3.62552300  |
| H | 0.82831600  | -2.68788900 | -1.62879600 |
| H | 2.23839400  | -4.29804800 | -2.86959300 |
| H | 3.74022600  | -5.86160100 | -1.60889800 |
| H | 3.76271300  | -5.79296700 | 0.88708400  |

|   |             |             |             |
|---|-------------|-------------|-------------|
| H | 2.31781900  | -4.21779600 | 2.10930000  |
| H | -0.76582600 | -2.35501900 | -2.55748500 |
| H | -1.43683200 | -4.37044900 | -3.82608800 |
| H | -3.86504600 | -4.91142300 | -4.11220200 |
| H | -5.58696900 | -3.39017000 | -3.13184900 |
| H | -4.90706800 | -1.36736900 | -1.89194100 |
| H | -2.27265600 | 4.01082000  | 2.49550100  |
| H | -0.74487900 | 2.83606200  | -1.35504500 |
| H | -2.14075700 | 4.55702900  | -2.45231100 |
| H | -3.64645200 | 6.00569500  | -1.06560500 |
| H | -3.68892700 | 5.70925600  | 1.41419000  |
| H | 1.61784500  | 1.95164400  | 3.65226700  |
| H | 1.17352900  | 4.11573500  | -0.06389400 |
| H | 3.29254900  | 5.28590200  | 0.36613600  |
| H | 4.60167300  | 4.81351500  | 2.44639800  |
| H | 3.73138800  | 3.13853400  | 4.08747700  |
| H | 3.79008100  | -2.21254200 | -0.79773300 |
| H | 5.44473500  | -2.79924000 | 0.92420600  |
| H | 6.19194000  | -1.09764200 | 2.59778900  |
| H | 5.22469800  | 1.21264100  | 2.51075000  |
| H | 3.55089800  | 1.79262300  | 0.80610600  |
| H | 0.47623800  | -0.87896900 | -3.33311000 |
| H | 0.88262500  | -2.08006900 | -5.46630000 |
| H | 3.22630500  | -2.58131900 | -6.18820700 |
| H | 5.14029300  | -1.83000300 | -4.77038100 |
| H | 4.72686000  | -0.60735300 | -2.66082600 |
| H | 0.72177000  | 2.48165300  | -2.48567700 |
| H | 1.32495700  | 4.68575400  | -3.43490700 |
| H | 3.71368400  | 5.44110800  | -3.41088300 |
| H | 5.46741200  | 3.93699400  | -2.46167300 |
| H | 4.85725400  | 1.73436300  | -1.53474200 |

**L<sub>1</sub>**

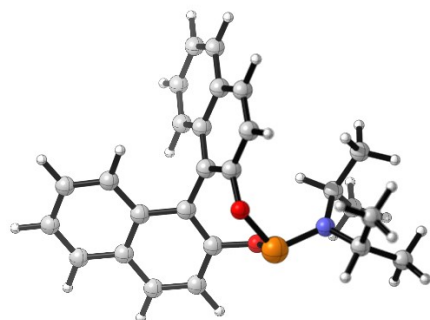

|   |            |            |            |
|---|------------|------------|------------|
| C | 2.20668300 | 4.34526400 | 1.02558900 |
| C | 2.74626300 | 3.14186000 | 1.54477600 |

|   |             |             |             |
|---|-------------|-------------|-------------|
| C | 2.29381700  | 1.91672400  | 1.09738800  |
| C | 1.27367400  | 1.82109200  | 0.10564700  |
| C | 0.70383700  | 3.04484600  | -0.39087200 |
| C | 1.20216000  | 4.29214000  | 0.08202200  |
| C | 0.77845500  | 0.55934300  | -0.38123500 |
| C | -0.32692000 | 0.56755900  | -1.23084600 |
| C | -0.88215800 | 1.77558300  | -1.72427500 |
| C | -0.36538300 | 2.98614500  | -1.32845000 |
| C | 1.37613600  | -0.74674200 | 0.01949500  |
| C | 2.76342100  | -1.06581400 | -0.20078800 |
| C | 3.28223900  | -2.32406000 | 0.26482900  |
| C | 2.40603100  | -3.25102100 | 0.89623700  |
| C | 1.06818600  | -2.96520100 | 1.03523400  |
| C | 0.55948600  | -1.71987600 | 0.58994200  |
| C | 3.65257500  | -0.19663100 | -0.89920000 |
| C | 4.97805000  | -0.53092700 | -1.09078600 |
| C | 5.49393700  | -1.75426900 | -0.59478800 |
| C | 4.65817000  | -2.63166200 | 0.06353900  |
| O | -0.91188000 | -0.60548700 | -1.62908200 |
| O | -0.78334200 | -1.47841500 | 0.75704500  |
| H | 2.57821800  | 5.30880000  | 1.38367400  |
| H | 3.52513200  | 3.18368300  | 2.31082200  |
| H | 2.71546000  | 1.00346300  | 1.51755400  |
| H | 0.76306100  | 5.21195700  | -0.31441200 |
| H | -1.72230200 | 1.70933500  | -2.41790600 |
| H | -0.78689500 | 3.91924500  | -1.71142700 |
| H | 2.80737200  | -4.20445400 | 1.24969800  |
| H | 0.37263100  | -3.67264700 | 1.49149700  |
| H | 3.27499700  | 0.74511300  | -1.29778200 |
| H | 5.63499500  | 0.15312800  | -1.63450600 |
| H | 6.54718700  | -2.00369800 | -0.74716600 |
| H | 5.03771300  | -3.58784200 | 0.43458300  |
| P | -1.82027100 | -1.62435600 | -0.59025000 |
| N | -3.10252000 | -0.73113800 | 0.03018200  |
| C | -2.90641600 | 0.41708400  | 0.95529000  |
| C | -3.12095000 | 0.03204100  | 2.42610300  |
| C | -3.68896400 | 1.67612100  | 0.57657000  |
| H | -1.84386900 | 0.67425400  | 0.86265100  |
| H | -2.56297100 | -0.88492700 | 2.66532300  |
| H | -2.74739700 | 0.83898500  | 3.07820300  |
| H | -4.18103500 | -0.12768800 | 2.66914500  |
| H | -3.50754000 | 1.96407900  | -0.46850500 |
| H | -4.77236600 | 1.55809700  | 0.72766000  |
| H | -3.35522400 | 2.50847700  | 1.21692700  |

|   |             |             |             |
|---|-------------|-------------|-------------|
| C | -4.42839400 | -1.18564900 | -0.46442100 |
| C | -4.99004300 | -0.32776200 | -1.60808600 |
| C | -5.45996200 | -1.40791300 | 0.64396800  |
| H | -4.22444800 | -2.17841900 | -0.90403000 |
| H | -4.21816400 | -0.15102400 | -2.37356200 |
| H | -5.83108700 | -0.85380300 | -2.08931400 |
| H | -5.36405000 | 0.64617800  | -1.26322700 |
| H | -5.06017700 | -2.05966900 | 1.43530000  |
| H | -5.78628100 | -0.46206000 | 1.10140300  |
| H | -6.35305700 | -1.89370300 | 0.21888000  |

Catalyst

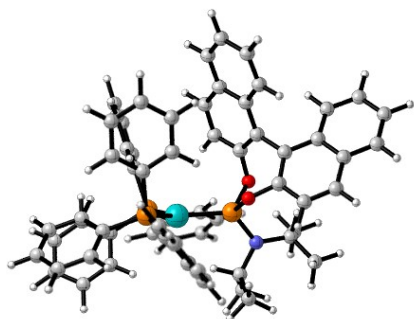

|    |             |             |             |
|----|-------------|-------------|-------------|
| Pd | 0.99516300  | -0.24784400 | -0.53942300 |
| C  | -8.40393200 | -0.49189100 | 0.14265600  |
| C  | -7.64564500 | -0.56998000 | 1.33747700  |
| C  | -6.27783000 | -0.38292500 | 1.31697300  |
| C  | -5.58662000 | -0.10502100 | 0.10089000  |
| C  | -6.35649500 | -0.06032200 | -1.11339200 |
| C  | -7.76685900 | -0.24596900 | -1.05578000 |
| C  | -4.16095900 | 0.08843700  | 0.04474100  |
| C  | -3.55946100 | 0.21148700  | -1.20757800 |
| C  | -4.32279000 | 0.26817000  | -2.40206800 |
| C  | -5.69124200 | 0.15163400  | -2.35418500 |
| C  | -3.30267700 | 0.10340700  | 1.26330200  |
| C  | -3.47735000 | 1.04842100  | 2.33471200  |
| C  | -2.60890800 | 0.98521400  | 3.47991000  |
| C  | -1.57989800 | 0.00396800  | 3.52611100  |
| C  | -1.38284300 | -0.85246500 | 2.46881000  |
| C  | -2.23654700 | -0.78838000 | 1.34054600  |
| C  | -4.43973400 | 2.09923200  | 2.28416200  |
| C  | -4.55360600 | 3.01561800  | 3.31074200  |
| C  | -3.71240800 | 2.93410800  | 4.44892900  |
| C  | -2.76093600 | 1.93861300  | 4.52635300  |
| O  | -2.20035300 | 0.30882000  | -1.32511400 |

|   |             |             |             |
|---|-------------|-------------|-------------|
| O | -1.98461600 | -1.63360200 | 0.28684500  |
| H | -9.48686100 | -0.63714000 | 0.17323700  |
| H | -8.14795300 | -0.78585800 | 2.28424800  |
| H | -5.71227600 | -0.45744400 | 2.24620400  |
| H | -8.33629700 | -0.19886100 | -1.98833100 |
| H | -3.78924900 | 0.40225100  | -3.34491600 |
| H | -6.28332400 | 0.19837300  | -3.27208200 |
| H | -0.91969700 | -0.03591300 | 4.39534800  |
| H | -0.57086000 | -1.57959300 | 2.46758800  |
| H | -5.08481800 | 2.18960400  | 1.41003800  |
| H | -5.29343600 | 3.81733100  | 3.24031300  |
| H | -3.81266200 | 3.66653400  | 5.25404700  |
| H | -2.09097600 | 1.87547200  | 5.38831400  |
| P | -1.08802600 | -0.97682200 | -1.01670700 |
| N | -1.39629700 | -2.18565500 | -2.14185100 |
| C | -2.67776500 | -2.93492800 | -2.15928000 |
| C | -2.59057500 | -4.28451600 | -1.43094800 |
| C | -3.29175500 | -3.07707100 | -3.55279300 |
| H | -3.37564300 | -2.32287300 | -1.57331700 |
| H | -2.13877800 | -4.15322100 | -0.43734800 |
| H | -3.60441700 | -4.69584400 | -1.29283500 |
| H | -2.00338800 | -5.02793100 | -1.98815600 |
| H | -3.37440500 | -2.10245300 | -4.05477600 |
| H | -2.71095200 | -3.75539800 | -4.19558900 |
| H | -4.30658000 | -3.49645900 | -3.45949400 |
| C | -0.27001700 | -2.43529000 | -3.07488200 |
| C | -0.47140300 | -1.82434700 | -4.47000500 |
| C | 0.16845300  | -3.89873000 | -3.14176200 |
| H | 0.57325500  | -1.88441800 | -2.61851700 |
| H | -0.88092200 | -0.80576900 | -4.39092700 |
| H | 0.49782000  | -1.76160600 | -4.99165600 |
| H | -1.14684100 | -2.41927100 | -5.10153000 |
| H | 0.35643700  | -4.29991500 | -2.13458500 |
| H | -0.57819300 | -4.53450800 | -3.64105200 |
| H | 1.10369100  | -3.97175300 | -3.72046700 |
| P | 1.61197300  | 1.97381700  | -1.05289200 |
| C | 3.40137800  | 2.42919100  | -1.15289700 |
| C | 3.98901300  | 3.03305400  | -2.27658500 |
| C | 4.22828900  | 2.05801900  | -0.07473900 |
| C | 5.36985100  | 3.26491600  | -2.31744600 |
| H | 3.37293400  | 3.32564100  | -3.12919500 |
| C | 5.60000800  | 2.30951300  | -0.10811600 |
| H | 3.79614100  | 1.56130100  | 0.79609900  |
| C | 6.17805000  | 2.90992200  | -1.23396200 |

|   |             |             |             |
|---|-------------|-------------|-------------|
| H | 5.81226700  | 3.73053300  | -3.20250100 |
| H | 6.22283000  | 2.01531300  | 0.73997500  |
| H | 7.25527700  | 3.09345300  | -1.26682500 |
| C | 0.94629500  | 3.06461700  | 0.28838700  |
| C | 1.70249500  | 4.03288000  | 0.96860400  |
| C | -0.39357800 | 2.85360400  | 0.67182200  |
| C | 1.13561400  | 4.76676400  | 2.01836000  |
| H | 2.74134900  | 4.21832500  | 0.68915700  |
| C | -0.96024400 | 3.59965900  | 1.70707100  |
| H | -0.99263600 | 2.09252000  | 0.16404200  |
| C | -0.19480000 | 4.55264700  | 2.39036200  |
| H | 1.73992000  | 5.51177900  | 2.54330900  |
| H | -1.99922000 | 3.42629300  | 1.99193500  |
| H | -0.63731400 | 5.12247200  | 3.21175700  |
| C | 0.89780800  | 2.72900100  | -2.58120000 |
| C | 0.55431500  | 1.87458200  | -3.64108100 |
| C | 0.67599200  | 4.11005000  | -2.71649500 |
| C | 0.00767600  | 2.38969500  | -4.82086500 |
| H | 0.70362400  | 0.79698400  | -3.53259800 |
| C | 0.12074100  | 4.62414800  | -3.89217600 |
| H | 0.93515500  | 4.78731500  | -1.89866700 |
| C | -0.21284200 | 3.76565100  | -4.94696200 |
| H | -0.25560500 | 1.71273100  | -5.63808300 |
| H | -0.05441600 | 5.69948900  | -3.98476400 |
| H | -0.64959500 | 4.16984600  | -5.86418100 |
| P | 2.43832800  | -1.48861200 | 0.83763200  |
| C | 2.33746500  | -0.96821100 | 2.61187700  |
| C | 2.51081000  | -1.85311800 | 3.68938800  |
| C | 2.04124100  | 0.38063400  | 2.88194500  |
| C | 2.40017500  | -1.39486400 | 5.00740400  |
| H | 2.73053300  | -2.90691400 | 3.50389900  |
| C | 1.94347800  | 0.83967200  | 4.19776400  |
| H | 1.86085900  | 1.07235900  | 2.05655400  |
| C | 2.12086500  | -0.04805300 | 5.26517600  |
| H | 2.53359100  | -2.09561100 | 5.83608500  |
| H | 1.70625300  | 1.89019800  | 4.38454200  |
| H | 2.03266600  | 0.30623100  | 6.29571700  |
| C | 4.23930000  | -1.34548300 | 0.44070800  |
| C | 5.25296000  | -1.23616900 | 1.40569800  |
| C | 4.58895400  | -1.31672700 | -0.92121000 |
| C | 6.59085300  | -1.10626900 | 1.01446200  |
| H | 5.00290300  | -1.24878100 | 2.46890100  |
| C | 5.92514200  | -1.20178900 | -1.31041600 |
| H | 3.80231800  | -1.36633800 | -1.68058400 |

|   |             |             |             |
|---|-------------|-------------|-------------|
| C | 6.93054200  | -1.09283700 | -0.34218600 |
| H | 7.37051500  | -1.01492400 | 1.77571100  |
| H | 6.18119700  | -1.17762700 | -2.37288900 |
| H | 7.97554700  | -0.98749300 | -0.64546400 |
| C | 2.19907800  | -3.32660800 | 0.92499000  |
| C | 0.88094600  | -3.81476400 | 0.86429100  |
| C | 3.25736900  | -4.24588700 | 1.02229200  |
| C | 0.62594800  | -5.18762600 | 0.91251300  |
| H | 0.04725500  | -3.11656100 | 0.76556400  |
| C | 3.00122900  | -5.62184000 | 1.05813200  |
| H | 4.28965100  | -3.89225400 | 1.06729000  |
| C | 1.68673500  | -6.09655800 | 1.00569600  |
| H | -0.40515100 | -5.54702800 | 0.86127400  |
| H | 3.83549100  | -6.32545400 | 1.12650800  |
| H | 1.48908300  | -7.17155800 | 1.03026900  |

### INT-1

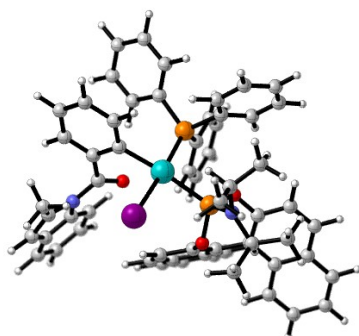

|   |             |             |             |
|---|-------------|-------------|-------------|
| C | -4.97771200 | -2.72805700 | -0.31133700 |
| C | -5.77997500 | -1.59340900 | -0.14500100 |
| C | -5.18531400 | -0.33284500 | -0.15596700 |
| C | -3.79257600 | -0.20006300 | -0.30880400 |
| C | -2.96594100 | -1.34119100 | -0.42447800 |
| C | -3.59130600 | -2.59801100 | -0.45199900 |
| C | -3.17856500 | 1.15003900  | -0.16341300 |
| N | -3.77095900 | 2.26157700  | -0.79452600 |
| C | -4.48422000 | 2.32443400  | -2.02338700 |
| C | -3.58627100 | 3.58267100  | -0.32557400 |
| C | -4.21301200 | 4.45682700  | -1.25116000 |
| C | -4.75251000 | 3.63635500  | -2.30350300 |
| C | -2.96012000 | 4.07044700  | 0.82903100  |
| C | -2.97160200 | 5.45231000  | 1.04057100  |
| C | -3.58216900 | 6.33229800  | 0.12596900  |
| C | -4.20606900 | 5.84314000  | -1.02148600 |
| C | -4.80654600 | 1.15236300  | -2.89098500 |

|    |             |             |             |
|----|-------------|-------------|-------------|
| O  | -2.21255900 | 1.32214200  | 0.56327300  |
| Pd | -0.92345300 | -1.22299600 | -0.58901100 |
| C  | 7.77212100  | 2.51719700  | -0.04903400 |
| C  | 6.72114300  | 3.37250600  | -0.46486200 |
| C  | 5.40665100  | 2.95719300  | -0.39608600 |
| C  | 5.06551700  | 1.66118200  | 0.09069400  |
| C  | 6.13821600  | 0.78143400  | 0.47071300  |
| C  | 7.48224700  | 1.24742300  | 0.40349000  |
| C  | 3.70389700  | 1.19942900  | 0.17503000  |
| C  | 3.49099800  | -0.13833400 | 0.50323100  |
| C  | 4.54468700  | -1.00696600 | 0.87525800  |
| C  | 5.84072800  | -0.54798800 | 0.88213300  |
| C  | 2.53455200  | 2.08037400  | -0.11346600 |
| C  | 2.28326200  | 3.30363800  | 0.60376700  |
| C  | 1.12423700  | 4.08827800  | 0.27168500  |
| C  | 0.23881200  | 3.64273500  | -0.74899500 |
| C  | 0.46236200  | 2.45090100  | -1.39567600 |
| C  | 1.59969700  | 1.67991300  | -1.06197100 |
| C  | 3.10283200  | 3.74878900  | 1.68189800  |
| C  | 2.81054800  | 4.90705200  | 2.37341200  |
| C  | 1.67872100  | 5.68775500  | 2.02936300  |
| C  | 0.85425700  | 5.28113500  | 1.00124400  |
| O  | 2.21962200  | -0.67113600 | 0.47651700  |
| O  | 1.77852100  | 0.48439400  | -1.72907800 |
| H  | -5.43139400 | -3.72332900 | -0.31730500 |
| H  | -6.85961800 | -1.69092200 | -0.00757600 |
| H  | -5.79937700 | 0.56189000  | -0.02549800 |
| H  | -2.98858500 | -3.50385700 | -0.56221600 |
| H  | -5.26749900 | 3.98443100  | -3.19759100 |
| H  | -2.46196400 | 3.40369000  | 1.52837900  |
| H  | -2.48418500 | 5.85398400  | 1.93255500  |
| H  | -3.56571300 | 7.40816300  | 0.31957000  |
| H  | -4.68572800 | 6.52047000  | -1.73285900 |
| H  | -5.07653200 | 1.52263600  | -3.89042600 |
| H  | -3.95157700 | 0.46920100  | -2.99355000 |
| H  | -5.65215800 | 0.56181500  | -2.50848000 |
| H  | 8.80808900  | 2.86161800  | -0.10100300 |
| H  | 6.95403000  | 4.36952700  | -0.84781800 |
| H  | 4.61389100  | 3.62765900  | -0.72873700 |
| H  | 8.28457900  | 0.56985100  | 0.70832300  |
| H  | 4.29460600  | -2.03347200 | 1.14757700  |
| H  | 6.66008000  | -1.20891900 | 1.17618800  |
| H  | -0.64209700 | 4.24237900  | -0.98668200 |
| H  | -0.22139600 | 2.06772300  | -2.15423800 |



|   |             |             |             |
|---|-------------|-------------|-------------|
| H | 3.96255200  | 3.15066200  | 1.98208100  |
| H | 3.45148900  | 5.21788700  | 3.20257300  |
| H | 1.45703700  | 6.60176900  | 2.58628200  |
| H | -0.03459900 | 5.85960800  | 0.73710400  |
| P | 1.39720000  | -0.95121600 | -0.96886500 |
| N | 2.26730800  | -1.99731100 | -1.92462700 |
| C | 3.50705800  | -1.53540300 | -2.61862500 |
| C | 3.23960700  | -1.10029500 | -4.06562400 |
| C | 4.67847000  | -2.51224000 | -2.51966200 |
| H | 3.81717800  | -0.63380400 | -2.07670300 |
| H | 2.34842000  | -0.45822400 | -4.11627600 |
| H | 4.10183800  | -0.52489900 | -4.44103200 |
| H | 3.09219100  | -1.95623300 | -4.73915100 |
| H | 4.88297400  | -2.79244800 | -1.47654300 |
| H | 4.51278200  | -3.42623400 | -3.10800700 |
| H | 5.57992100  | -2.02062800 | -2.91915900 |
| C | 1.69975100  | -3.36600500 | -2.06261600 |
| C | 2.44316600  | -4.41738400 | -1.23204300 |
| C | 1.51462900  | -3.80900200 | -3.51408300 |
| H | 0.68829700  | -3.28437700 | -1.62866300 |
| H | 2.60030100  | -4.06337900 | -0.20368800 |
| H | 1.84262900  | -5.33819200 | -1.18275800 |
| H | 3.41703300  | -4.68333900 | -1.66427200 |
| H | 0.95924400  | -3.05652400 | -4.09096800 |
| H | 2.47728300  | -4.00171800 | -4.01050100 |
| H | 0.93933400  | -4.74863200 | -3.53365200 |
| P | -0.74291900 | -1.70928200 | 1.69089700  |
| C | -2.30020900 | -2.11754200 | 2.59865100  |
| C | -2.61456500 | -3.38743600 | 3.10314300  |
| C | -3.20889700 | -1.05970000 | 2.78823400  |
| C | -3.82774300 | -3.59914300 | 3.77015100  |
| H | -1.92249400 | -4.22209000 | 2.99137800  |
| C | -4.41689900 | -1.27642200 | 3.45060400  |
| H | -2.96764900 | -0.06535300 | 2.40946700  |
| C | -4.73391800 | -2.54989800 | 3.93940400  |
| H | -4.06008800 | -4.59434500 | 4.15842000  |
| H | -5.11673500 | -0.44695500 | 3.58014000  |
| H | -5.68233900 | -2.72018500 | 4.45561000  |
| C | -0.06075200 | -0.41364900 | 2.80227500  |
| C | 0.08855100  | -0.70734000 | 4.17138100  |
| C | 0.20240400  | 0.88262100  | 2.34122300  |
| C | 0.51311800  | 0.27939500  | 5.06240100  |
| H | -0.13593300 | -1.70895200 | 4.54535000  |
| C | 0.60000800  | 1.87548700  | 3.24391600  |

|   |             |             |             |
|---|-------------|-------------|-------------|
| H | 0.07119600  | 1.13140400  | 1.29053000  |
| C | 0.76320700  | 1.57661100  | 4.59891500  |
| H | 0.63367300  | 0.03807800  | 6.12169700  |
| H | 0.77813700  | 2.88877700  | 2.88368000  |
| H | 1.07945500  | 2.35725800  | 5.29590500  |
| C | 0.31755900  | -3.20076300 | 1.87247700  |
| C | -0.12111500 | -4.39008900 | 1.25967900  |
| C | 1.53640800  | -3.19774500 | 2.56789000  |
| C | 0.61130900  | -5.56982900 | 1.40217000  |
| H | -1.04531100 | -4.39692600 | 0.67630100  |
| C | 2.27915400  | -4.37790900 | 2.68668100  |
| H | 1.91337500  | -2.27890800 | 3.01745900  |
| C | 1.81097100  | -5.56813800 | 2.12248500  |
| H | 0.25040600  | -6.48982900 | 0.93595500  |
| H | 3.22745800  | -4.36340100 | 3.23009800  |
| H | 2.38845100  | -6.49002900 | 2.22794400  |
| I | -1.30540700 | -0.87900000 | -3.27922300 |

PPh<sub>3</sub>

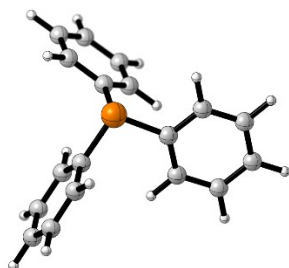

|   |             |             |             |
|---|-------------|-------------|-------------|
| P | 0.00127500  | 0.00033500  | -1.24391200 |
| C | -1.05377500 | 1.28733400  | -0.42914300 |
| C | -1.85846000 | 1.05182500  | 0.69855000  |
| C | -1.04234100 | 2.57563000  | -0.99593800 |
| C | -2.62836600 | 2.08277800  | 1.24886700  |
| H | -1.88435600 | 0.06028600  | 1.15587700  |
| C | -1.80285100 | 3.60746100  | -0.43892800 |
| H | -0.43000700 | 2.77416300  | -1.88105400 |
| C | -2.60068000 | 3.36253000  | 0.68493900  |
| H | -3.25039800 | 1.88393900  | 2.12596700  |
| H | -1.77863400 | 4.60389500  | -0.88850700 |
| H | -3.20234000 | 4.16655800  | 1.11714600  |
| C | 1.64337100  | 0.26886900  | -0.42893900 |
| C | 1.84358900  | 1.08665400  | 0.69612400  |
| C | 2.75186100  | -0.38911800 | -0.99402100 |
| C | 3.12183400  | 1.23706700  | 1.24567900  |
| H | 0.99923500  | 1.60874400  | 1.15164100  |

|   |             |             |             |
|---|-------------|-------------|-------------|
| C | 4.02592800  | -0.24815700 | -0.43706100 |
| H | 2.61624700  | -1.02077500 | -1.87747300 |
| C | 4.21465600  | 0.56877700  | 0.68404100  |
| H | 3.26218300  | 1.87791800  | 2.12054800  |
| H | 4.87554800  | -0.77060800 | -0.88505900 |
| H | 5.21213300  | 0.68719000  | 1.11568600  |
| C | -0.58742900 | -1.55659200 | -0.43005900 |
| C | -1.71304900 | -2.18567400 | -0.99408600 |
| C | 0.02042700  | -2.13975600 | 0.69457000  |
| C | -2.22965200 | -3.35851700 | -0.43680600 |
| H | -2.19240400 | -1.75145400 | -1.87696500 |
| C | -0.49007900 | -3.32108700 | 1.24459500  |
| H | 0.89533100  | -1.67031800 | 1.14969500  |
| C | -1.61707500 | -3.93115600 | 0.68414200  |
| H | -3.10824800 | -3.83131400 | -0.88412800 |
| H | -0.00569600 | -3.76352400 | 2.11946100  |
| H | -2.01518300 | -4.85294000 | 1.11668100  |

### TS-1

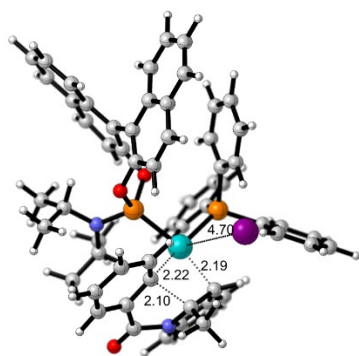

|   |             |             |             |
|---|-------------|-------------|-------------|
| C | -0.63376200 | -0.16323300 | -4.47745700 |
| C | -1.03003500 | -1.39071600 | -5.03425500 |
| C | -1.90996900 | -2.20966000 | -4.33221500 |
| C | -2.34961500 | -1.81672800 | -3.05776100 |
| C | -1.86600700 | -0.64399300 | -2.44423000 |
| C | -1.06618500 | 0.22233700  | -3.20677600 |
| C | -3.46891200 | -2.51317900 | -2.38923300 |
| N | -4.08206700 | -1.63129300 | -1.47720200 |
| C | -3.69913900 | -0.25433400 | -1.48894000 |
| C | -4.42687300 | -2.00964700 | -0.16307200 |
| C | -4.21617400 | -0.90227800 | 0.69146600  |
| C | -3.67334400 | 0.19375600  | -0.12050400 |
| C | -4.86038900 | -3.24794400 | 0.31134200  |
| C | -5.13138900 | -3.34775200 | 1.68196100  |
| C | -4.97497800 | -2.24477700 | 2.53927600  |

|    |             |             |             |
|----|-------------|-------------|-------------|
| C  | -4.51315200 | -1.01803500 | 2.05443900  |
| C  | -4.23067900 | 0.65280800  | -2.57156300 |
| O  | -3.82611300 | -3.66438500 | -2.54566100 |
| H  | 0.02589700  | 0.50294800  | -5.03999600 |
| H  | -0.68537000 | -1.67849400 | -6.03014200 |
| H  | -2.31059600 | -3.12621000 | -4.77216600 |
| H  | -0.75772700 | 1.18675900  | -2.80173200 |
| H  | -3.85461100 | 1.24213700  | 0.11063800  |
| H  | -4.99694100 | -4.08703600 | -0.36964200 |
| H  | -5.48795000 | -4.29872000 | 2.08576900  |
| H  | -5.21125000 | -2.34994100 | 3.60082500  |
| H  | -4.37382300 | -0.16818000 | 2.72242400  |
| H  | -3.68972300 | 1.60924100  | -2.56009100 |
| H  | -5.29414300 | 0.84719200  | -2.35133300 |
| H  | -4.15083700 | 0.20288100  | -3.56920700 |
| I  | -1.54841900 | 4.10872800  | -2.24975200 |
| Pd | -1.51883500 | -0.17235700 | -0.30647000 |
| C  | 7.63582100  | -2.58653300 | 0.29629900  |
| C  | 7.37823200  | -1.52089300 | -0.60208000 |
| C  | 6.14507800  | -0.90140700 | -0.62367700 |
| C  | 5.09510200  | -1.31678800 | 0.24643300  |
| C  | 5.34781100  | -2.42551600 | 1.12691700  |
| C  | 6.63769500  | -3.02899300 | 1.13860100  |
| C  | 3.79435400  | -0.69667300 | 0.23975800  |
| C  | 2.78467600  | -1.31125400 | 0.97576800  |
| C  | 3.03171300  | -2.38957900 | 1.85686800  |
| C  | 4.29819900  | -2.91625200 | 1.95283700  |
| C  | 3.50099600  | 0.55160600  | -0.52271600 |
| C  | 4.26337300  | 1.76009500  | -0.31795700 |
| C  | 3.95471700  | 2.93108000  | -1.09157500 |
| C  | 2.87800500  | 2.89503500  | -2.01876300 |
| C  | 2.12194400  | 1.75813100  | -2.16613500 |
| C  | 2.43338500  | 0.60277800  | -1.41344900 |
| C  | 5.29266700  | 1.86700100  | 0.66240500  |
| C  | 5.99873200  | 3.03962300  | 0.83794300  |
| C  | 5.71150500  | 4.18160100  | 0.04988800  |
| C  | 4.70318400  | 4.12524900  | -0.88857000 |
| O  | 1.47828700  | -0.87771000 | 0.86459800  |
| O  | 1.65797200  | -0.51975400 | -1.64807800 |
| H  | 8.61972600  | -3.06225200 | 0.30893700  |
| H  | 8.16256100  | -1.18857800 | -1.28707600 |
| H  | 5.96375000  | -0.08778000 | -1.32605500 |
| H  | 6.81677800  | -3.86280600 | 1.82298500  |
| H  | 2.19758200  | -2.78458800 | 2.43869100  |

|   |             |             |             |
|---|-------------|-------------|-------------|
| H | 4.50183200  | -3.74543900 | 2.63505500  |
| H | 2.63635500  | 3.79122700  | -2.59515300 |
| H | 1.28110000  | 1.72253700  | -2.85622100 |
| H | 5.51476700  | 1.01396900  | 1.30198000  |
| H | 6.77730800  | 3.09130900  | 1.60352500  |
| H | 6.27680100  | 5.10493600  | 0.19950900  |
| H | 4.45154800  | 5.00384100  | -1.48866800 |
| P | 0.59677800  | -1.14977300 | -0.53835000 |
| N | 0.68961300  | -2.76074200 | -0.97043700 |
| C | 1.92093800  | -3.30760300 | -1.62446200 |
| C | 1.75583000  | -3.43798300 | -3.14321600 |
| C | 2.46064200  | -4.58732900 | -0.98283300 |
| H | 2.69295400  | -2.54723000 | -1.46663600 |
| H | 1.36314600  | -2.50331200 | -3.56849800 |
| H | 2.73843000  | -3.63601600 | -3.60237100 |
| H | 1.08369100  | -4.25954600 | -3.42703000 |
| H | 2.61133200  | -4.46110500 | 0.09754700  |
| H | 1.81104300  | -5.45733000 | -1.15240600 |
| H | 3.44031800  | -4.81403200 | -1.43268000 |
| C | -0.45970600 | -3.61641700 | -0.56562500 |
| C | -0.25201100 | -4.32190600 | 0.78258800  |
| C | -0.90405900 | -4.61089500 | -1.63781900 |
| H | -1.29282400 | -2.90367600 | -0.42997000 |
| H | 0.16950100  | -3.63736600 | 1.52991800  |
| H | -1.22134300 | -4.68628000 | 1.15891400  |
| H | 0.41792900  | -5.18839700 | 0.69554300  |
| H | -1.06490500 | -4.12333900 | -2.60488500 |
| H | -0.17759300 | -5.42493600 | -1.77005000 |
| H | -1.85943000 | -5.05983700 | -1.33051200 |
| P | -1.11696000 | 0.79185500  | 1.85084100  |
| C | 0.42007300  | 1.81445400  | 1.95085700  |
| C | 0.48968100  | 2.99034700  | 1.18419400  |
| C | 1.51489100  | 1.46592900  | 2.75985300  |
| C | 1.60004700  | 3.83272300  | 1.27828100  |
| H | -0.30787700 | 3.26138300  | 0.49258700  |
| C | 2.62186300  | 2.31320000  | 2.85124900  |
| H | 1.52110200  | 0.52830600  | 3.31368400  |
| C | 2.66130600  | 3.50723500  | 2.12584400  |
| H | 1.63449700  | 4.73932800  | 0.66993400  |
| H | 3.46547400  | 2.02796600  | 3.48463900  |
| H | 3.53287900  | 4.16144600  | 2.19115100  |
| C | -1.01722600 | -0.45916400 | 3.18617100  |
| C | -0.65157400 | -0.13125100 | 4.50634700  |
| C | -1.35341900 | -1.78621300 | 2.88133500  |

|   |             |             |            |
|---|-------------|-------------|------------|
| C | -0.61453700 | -1.11924700 | 5.49247300 |
| H | -0.39501000 | 0.89680800  | 4.76829800 |
| C | -1.31982000 | -2.77320000 | 3.87104400 |
| H | -1.64351300 | -2.04563700 | 1.86230600 |
| C | -0.94861400 | -2.44205600 | 5.17681400 |
| H | -0.32510100 | -0.85383800 | 6.51239100 |
| H | -1.58364500 | -3.80192200 | 3.61618500 |
| H | -0.91999900 | -3.21324600 | 5.95103200 |
| C | -2.42537700 | 1.98703400  | 2.39499900 |
| C | -2.81548400 | 2.99515000  | 1.49438600 |
| C | -3.05955900 | 1.91774500  | 3.64657700 |
| C | -3.79764700 | 3.92356100  | 1.84436700 |
| H | -2.37404000 | 3.05383500  | 0.49697400 |
| C | -4.04984800 | 2.84522800  | 3.99110700 |
| H | -2.80286100 | 1.13653200  | 4.36164300 |
| C | -4.41902500 | 3.85280300  | 3.09600800 |
| H | -4.08111900 | 4.69661500  | 1.12560300 |
| H | -4.53510600 | 2.77249900  | 4.96794200 |
| H | -5.19331900 | 4.57449100  | 3.36874600 |

#### INT-2

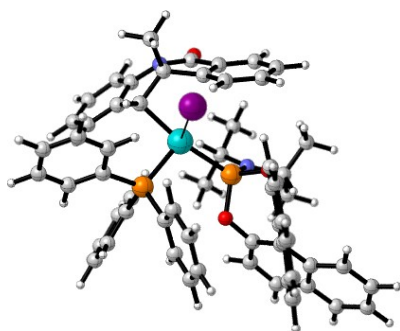

|   |             |             |             |
|---|-------------|-------------|-------------|
| C | -0.52895500 | 0.09540000  | -4.14720000 |
| C | -0.53622400 | -1.20447700 | -4.67545300 |
| C | -1.47944300 | -2.14508300 | -4.24775100 |
| C | -2.40287700 | -1.75258300 | -3.28075200 |
| C | -2.39524700 | -0.45238400 | -2.73949800 |
| C | -1.46584000 | 0.49517600  | -3.18518300 |
| C | -3.49051300 | -2.54588900 | -2.65375400 |
| N | -4.16865000 | -1.65379600 | -1.82730600 |
| C | -3.64974500 | -0.26457800 | -1.88131300 |
| C | -4.64909200 | -1.93500300 | -0.54306200 |
| C | -4.29794900 | -0.87548100 | 0.32983700  |
| C | -3.48409900 | 0.12459700  | -0.39991900 |
| C | -5.33738500 | -3.06783300 | -0.10721200 |
| C | -5.71462300 | -3.11599400 | 1.24084800  |

|    |             |             |             |
|----|-------------|-------------|-------------|
| C  | -5.42394100 | -2.05315900 | 2.11201900  |
| C  | -4.71836900 | -0.93151100 | 1.66482900  |
| C  | -4.63781600 | 0.67949400  | -2.58413300 |
| O  | -3.72546800 | -3.73713800 | -2.75374100 |
| H  | 0.21147400  | 0.81480600  | -4.50295500 |
| H  | 0.19816500  | -1.48017500 | -5.43552000 |
| H  | -1.50706600 | -3.15377500 | -4.66489500 |
| H  | -1.47817100 | 1.52140800  | -2.81066700 |
| H  | -3.68796600 | 1.17520800  | -0.18220000 |
| H  | -5.57172700 | -3.87340900 | -0.80274800 |
| H  | -6.25833400 | -3.98778200 | 1.61386100  |
| H  | -5.74647300 | -2.10580700 | 3.15469500  |
| H  | -4.48056800 | -0.11872400 | 2.35050700  |
| H  | -4.20642300 | 1.69060700  | -2.62846800 |
| H  | -5.58499500 | 0.72114000  | -2.02484500 |
| H  | -4.83693000 | 0.32912600  | -3.60856100 |
| I  | -1.16078400 | 4.46421700  | -2.10413600 |
| Pd | -1.43736700 | -0.29684400 | -0.25758900 |
| C  | 7.88573700  | -2.43708000 | 0.13023300  |
| C  | 7.56261700  | -1.33449500 | -0.70006500 |
| C  | 6.30264200  | -0.77235900 | -0.66446200 |
| C  | 5.29038200  | -1.28406600 | 0.19927500  |
| C  | 5.61083500  | -2.42671800 | 1.01176000  |
| C  | 6.92632900  | -2.97068100 | 0.96464800  |
| C  | 3.96338800  | -0.72731800 | 0.24939300  |
| C  | 2.99818200  | -1.41582800 | 0.98068200  |
| C  | 3.31343000  | -2.52871100 | 1.79470900  |
| C  | 4.60188100  | -3.00815300 | 1.82936600  |
| C  | 3.58654200  | 0.53345300  | -0.45123500 |
| C  | 4.26706200  | 1.77926500  | -0.19941700 |
| C  | 3.84727500  | 2.96459200  | -0.89507900 |
| C  | 2.73876700  | 2.90181700  | -1.78227300 |
| C  | 2.06368200  | 1.72059800  | -1.97563200 |
| C  | 2.49604100  | 0.54904000  | -1.31421700 |
| C  | 5.31822200  | 1.90658000  | 0.75485800  |
| C  | 5.94411700  | 3.11648600  | 0.97546100  |
| C  | 5.54876400  | 4.27564500  | 0.26239600  |
| C  | 4.51483700  | 4.19763200  | -0.64637900 |
| O  | 1.67443400  | -1.02725400 | 0.93133000  |
| O  | 1.80335500  | -0.62342200 | -1.57525800 |
| H  | 8.88974900  | -2.86771500 | 0.09726000  |
| H  | 8.31715600  | -0.92809500 | -1.37859700 |
| H  | 6.07118100  | 0.07110100  | -1.31547900 |
| H  | 7.15695000  | -3.83264300 | 1.59679500  |

|   |             |             |             |
|---|-------------|-------------|-------------|
| H | 2.50994000  | -2.99113800 | 2.37022300  |
| H | 4.85533100  | -3.86634900 | 2.45683800  |
| H | 2.40113200  | 3.81161900  | -2.28370500 |
| H | 1.19093300  | 1.66660700  | -2.62370000 |
| H | 5.62149800  | 1.03757300  | 1.33732600  |
| H | 6.74326500  | 3.18350600  | 1.71833200  |
| H | 6.05238900  | 5.22800300  | 0.44654000  |
| H | 4.17995600  | 5.08716200  | -1.18666500 |
| P | 0.74760800  | -1.25795100 | -0.45336900 |
| N | 0.79879100  | -2.86761200 | -0.89947400 |
| C | 2.02244500  | -3.46267200 | -1.51979400 |
| C | 1.88534100  | -3.60029400 | -3.04032300 |
| C | 2.50137800  | -4.76069800 | -0.86564000 |
| H | 2.81725900  | -2.72703500 | -1.35011600 |
| H | 1.57505000  | -2.64464800 | -3.48518300 |
| H | 2.85980600  | -3.87905000 | -3.47381500 |
| H | 1.15831400  | -4.37281600 | -3.32810100 |
| H | 2.63395900  | -4.64199100 | 0.21755400  |
| H | 1.82253800  | -5.60548600 | -1.05020300 |
| H | 3.48127400  | -5.02469700 | -1.29416300 |
| C | -0.38411100 | -3.67198000 | -0.47943100 |
| C | -0.20874300 | -4.35050100 | 0.88637300  |
| C | -0.87257400 | -4.65632800 | -1.53957200 |
| H | -1.18937700 | -2.92404000 | -0.35425100 |
| H | 0.17403700  | -3.64202200 | 1.63511100  |
| H | -1.18311400 | -4.72376300 | 1.23969500  |
| H | 0.47666000  | -5.20761400 | 0.83908400  |
| H | -1.03097600 | -4.16357000 | -2.50471900 |
| H | -0.17189000 | -5.49164100 | -1.67959100 |
| H | -1.83893800 | -5.07456200 | -1.22270500 |
| P | -1.27990200 | 0.68113700  | 1.84632100  |
| C | 0.29845300  | 1.60342200  | 2.09491000  |
| C | 0.47519400  | 2.83909300  | 1.44720400  |
| C | 1.33134700  | 1.10427700  | 2.90698700  |
| C | 1.63843800  | 3.58333500  | 1.65293900  |
| H | -0.28107900 | 3.23661600  | 0.77008100  |
| C | 2.49193000  | 1.85440900  | 3.10923300  |
| H | 1.24533700  | 0.12522300  | 3.37601400  |
| C | 2.64375400  | 3.10104900  | 2.49506200  |
| H | 1.75908600  | 4.53890500  | 1.13827100  |
| H | 3.28682700  | 1.45309400  | 3.74296100  |
| H | 3.55598300  | 3.68107600  | 2.64710400  |
| C | -1.36247900 | -0.57846600 | 3.17604100  |
| C | -1.08500200 | -0.25463200 | 4.51867800  |



|   |             |             |            |
|---|-------------|-------------|------------|
| C | -1.74337000 | -1.88975900 | 2.85250600 |
| C | -1.18763800 | -1.23060800 | 5.51190000 |
| H | -0.78547300 | 0.75920800  | 4.79101200 |
| C | -1.84740100 | -2.86360200 | 3.85008200 |
| H | -1.96374800 | -2.14933700 | 1.81629800 |
| C | -1.56974800 | -2.53625600 | 5.17976900 |
| H | -0.96697300 | -0.96978200 | 6.55000300 |
| H | -2.14432900 | -3.88011200 | 3.58199200 |
| H | -1.64843400 | -3.29806600 | 5.95972900 |
| C | -2.57049200 | 1.94155500  | 2.24363800 |
| C | -2.84408900 | 2.93197200  | 1.28303600 |
| C | -3.29109800 | 1.94706800  | 3.44987700 |
| C | -3.79689700 | 3.92124700  | 1.53288200 |
| H | -2.32538100 | 2.93636600  | 0.32203800 |
| C | -4.25299500 | 2.93409100  | 3.69155700 |
| H | -3.12296000 | 1.18124900  | 4.20684600 |
| C | -4.50519300 | 3.92572700  | 2.73910100 |
| H | -3.98501600 | 4.68302700  | 0.77225800 |
| H | -4.80721900 | 2.92271900  | 4.63357300 |
| H | -5.25677600 | 4.69537100  | 2.93263700 |

Yne

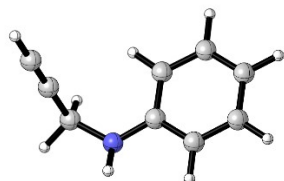

|   |             |             |             |
|---|-------------|-------------|-------------|
| C | 2.58725200  | -0.56965100 | 0.59633000  |
| C | 1.35690700  | -1.20527900 | 0.44777400  |
| C | 0.27061300  | -0.54646200 | -0.16880900 |
| C | 0.46158400  | 0.77619000  | -0.61711200 |
| C | 1.70360900  | 1.39943500  | -0.46813300 |
| C | 2.77598300  | 0.73906600  | 0.13566300  |
| H | 3.41024000  | -1.10546400 | 1.07726400  |
| H | 1.22641500  | -2.23183600 | 0.80368100  |
| H | -0.36057300 | 1.33290400  | -1.06784500 |
| H | 1.82564800  | 2.42620500  | -0.82400200 |
| H | 3.74153900  | 1.23609800  | 0.25226500  |
| N | -0.92831300 | -1.23315000 | -0.34443800 |
| H | -1.06016300 | -2.01646700 | 0.28514900  |
| C | -2.15543800 | -0.58231800 | -0.75456200 |
| H | -1.98306200 | -0.04075300 | -1.70077200 |
| H | -2.89133300 | -1.36746200 | -0.99597400 |
| C | -2.74681500 | 0.34120200  | 0.23202500  |

|   |             |            |            |
|---|-------------|------------|------------|
| C | -3.21699400 | 1.08859300 | 1.06112400 |
| H | -3.63072100 | 1.75417000 | 1.79550100 |

### INT-3

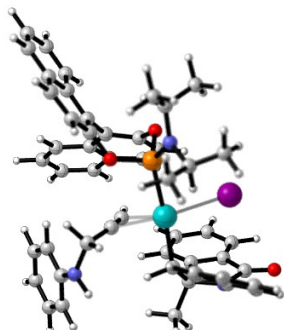

|    |             |             |             |
|----|-------------|-------------|-------------|
| C  | -2.01388500 | 3.36353800  | -2.74327100 |
| C  | -2.80424200 | 2.82405200  | -3.77181800 |
| C  | -3.82965900 | 1.91929800  | -3.47720000 |
| C  | -4.02744800 | 1.56490600  | -2.14261200 |
| C  | -3.22232300 | 2.07921000  | -1.11744000 |
| C  | -2.22300400 | 3.00597100  | -1.40355100 |
| C  | -5.00263800 | 0.59093400  | -1.57668500 |
| N  | -4.77357500 | 0.60383400  | -0.20424400 |
| C  | -3.70844900 | 1.55082400  | 0.21405100  |
| C  | -4.82891900 | -0.47712100 | 0.68058100  |
| C  | -3.70643800 | -0.42321600 | 1.54473300  |
| C  | -2.81494600 | 0.68988700  | 1.13837700  |
| C  | -5.75401000 | -1.51531400 | 0.73821800  |
| C  | -5.55436500 | -2.51320100 | 1.70600000  |
| C  | -4.47088400 | -2.45997000 | 2.59441700  |
| C  | -3.54088500 | -1.41280500 | 2.52113800  |
| C  | -4.31781500 | 2.70327700  | 1.04136000  |
| O  | -5.81558600 | -0.10566300 | -2.15625400 |
| Pd | -1.11604200 | -0.36417200 | 0.47836800  |
| C  | 8.14905100  | -0.72043200 | -0.78077400 |
| C  | 7.33289600  | -0.04285000 | -1.72024100 |
| C  | 5.97038400  | 0.06243700  | -1.52370700 |
| C  | 5.34341800  | -0.50415900 | -0.37536500 |
| C  | 6.17121300  | -1.22012000 | 0.55746700  |
| C  | 7.57457300  | -1.29997600 | 0.33107400  |
| C  | 3.92462200  | -0.41263300 | -0.13988200 |
| C  | 3.39225100  | -1.11173100 | 0.94004300  |
| C  | 4.20735100  | -1.81963200 | 1.85775700  |
| C  | 5.56941100  | -1.85722800 | 1.67932500  |
| C  | 3.02029300  | 0.35182500  | -1.04581900 |

|   |             |             |             |
|---|-------------|-------------|-------------|
| C | 3.17350500  | 1.76189900  | -1.29292600 |
| C | 2.30287400  | 2.41132300  | -2.23583800 |
| C | 1.29101000  | 1.65440300  | -2.89241100 |
| C | 1.09759900  | 0.32787200  | -2.58458500 |
| C | 1.94852700  | -0.30058700 | -1.64534600 |
| C | 4.12023700  | 2.56394300  | -0.59174700 |
| C | 4.21624500  | 3.92163900  | -0.82351400 |
| C | 3.37703600  | 4.55306400  | -1.77567900 |
| C | 2.44141700  | 3.81026100  | -2.46463900 |
| O | 2.04070600  | -1.10938300 | 1.18273100  |
| O | 1.66153400  | -1.60911000 | -1.28470600 |
| H | -1.22218400 | 4.07530500  | -2.99020200 |
| H | -2.61706900 | 3.11833400  | -4.80757400 |
| H | -4.45892200 | 1.49136800  | -4.26122200 |
| H | -1.61211900 | 3.44068100  | -0.60995100 |
| H | -2.40189100 | 1.28164900  | 1.96248100  |
| H | -6.59316400 | -1.54799000 | 0.04343900  |
| H | -6.26485800 | -3.34141600 | 1.77096500  |
| H | -4.34810300 | -3.24243200 | 3.34747700  |
| H | -2.68363800 | -1.38125400 | 3.19921700  |
| H | -3.52608200 | 3.41369000  | 1.32462700  |
| H | -5.08137800 | 3.23733100  | 0.45584000  |
| H | -4.78355700 | 2.31193200  | 1.95916500  |
| H | 9.22705200  | -0.79144400 | -0.94645200 |
| H | 7.78556100  | 0.39700200  | -2.61280900 |
| H | 5.36171300  | 0.57980100  | -2.26555900 |
| H | 8.18918100  | -1.84124700 | 1.05577300  |
| H | 3.72245200  | -2.32210200 | 2.69664600  |
| H | 6.20448100  | -2.39530900 | 2.38785000  |
| H | 0.63727200  | 2.15104100  | -3.61264900 |
| H | 0.28658400  | -0.25448200 | -3.02426200 |
| H | 4.76793300  | 2.09737000  | 0.15079700  |
| H | 4.94357800  | 4.51588000  | -0.26443300 |
| H | 3.46732400  | 5.62766200  | -1.95311700 |
| H | 1.77880400  | 4.28695500  | -3.19222600 |
| C | -0.46231900 | 5.93319000  | 2.86004800  |
| C | -0.79581600 | 4.67703700  | 3.36684900  |
| C | 0.08977600  | 3.58507700  | 3.23165700  |
| C | 1.31351300  | 3.79579200  | 2.55904700  |
| C | 1.63227900  | 5.05803600  | 2.05021400  |
| C | 0.75360500  | 6.13655000  | 2.19407300  |
| H | -1.16775300 | 6.76058900  | 2.97832000  |
| H | -1.75392900 | 4.52542700  | 3.87294100  |
| H | 2.01876000  | 2.97462000  | 2.42197400  |

|   |             |             |             |
|---|-------------|-------------|-------------|
| H | 2.58147100  | 5.18956500  | 1.52347400  |
| H | 1.00800400  | 7.11892400  | 1.78895500  |
| N | -0.26080200 | 2.34405400  | 3.75957800  |
| H | -1.23777600 | 2.27641500  | 4.03031100  |
| C | 0.26735700  | 1.11154900  | 3.20064500  |
| H | 1.34774800  | 1.01480800  | 3.40251600  |
| H | -0.21963300 | 0.26537700  | 3.70266400  |
| C | 0.07602000  | 1.04204600  | 1.72906100  |
| C | 0.08996100  | 1.45448800  | 0.55891100  |
| H | 0.28131800  | 1.97520000  | -0.36692200 |
| P | 0.84623300  | -1.75450600 | 0.17498500  |
| N | 0.82712100  | -3.39744000 | 0.38528900  |
| C | 2.00331500  | -4.21183000 | -0.03047300 |
| C | 1.77343200  | -4.92788500 | -1.36727300 |
| C | 2.51206200  | -5.15762600 | 1.05773500  |
| H | 2.80665700  | -3.48221000 | -0.20730600 |
| H | 1.37314400  | -4.22592100 | -2.11338400 |
| H | 2.73142100  | -5.32197100 | -1.74426300 |
| H | 1.07695300  | -5.77282800 | -1.27397100 |
| H | 2.70476900  | -4.62031700 | 1.99774100  |
| H | 1.80660100  | -5.97753200 | 1.25779900  |
| H | 3.46013300  | -5.60911800 | 0.72473800  |
| C | -0.37792500 | -3.93213200 | 1.07755200  |
| C | -0.17934800 | -4.14883300 | 2.58357300  |
| C | -0.98729500 | -5.14807500 | 0.38359900  |
| H | -1.12339400 | -3.12655900 | 0.98202400  |
| H | 0.29259100  | -3.26674200 | 3.04540600  |
| H | -1.16137900 | -4.29643500 | 3.06259600  |
| H | 0.43771800  | -5.02899000 | 2.81277800  |
| H | -1.16717400 | -4.93849000 | -0.68065400 |
| H | -0.35105100 | -6.04121500 | 0.47199600  |
| H | -1.95604000 | -5.38076200 | 0.85346100  |
| I | -2.31399700 | -1.78174400 | -1.61799100 |

TS-2

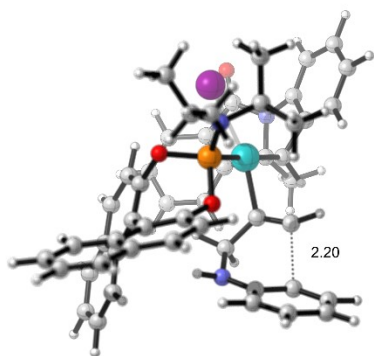

|    |             |             |             |
|----|-------------|-------------|-------------|
| C  | -1.85944200 | 4.41797100  | -0.08795000 |
| C  | -2.60567900 | 4.64168900  | -1.25682700 |
| C  | -3.70422900 | 3.83060900  | -1.56248800 |
| C  | -4.02568800 | 2.80071200  | -0.67773500 |
| C  | -3.27141800 | 2.56302000  | 0.47870200  |
| C  | -2.19000400 | 3.38072800  | 0.79485600  |
| C  | -5.10093400 | 1.77378700  | -0.79361100 |
| N  | -4.98911100 | 1.00235800  | 0.35392100  |
| C  | -3.89957300 | 1.43480100  | 1.26710600  |
| C  | -5.21009600 | -0.37382500 | 0.49605100  |
| C  | -4.15318400 | -0.93079100 | 1.25471100  |
| C  | -3.13815100 | 0.11535300  | 1.56654400  |
| C  | -6.23875500 | -1.15097200 | -0.03021900 |
| C  | -6.21578500 | -2.52976000 | 0.23367200  |
| C  | -5.19456900 | -3.09823000 | 1.00811800  |
| C  | -4.15819300 | -2.30290800 | 1.52069900  |
| C  | -4.50159900 | 1.98999800  | 2.57551200  |
| O  | -5.90066000 | 1.60281700  | -1.69773300 |
| Pd | -1.38118800 | -0.36723500 | 0.48644900  |
| C  | 7.77788400  | -0.19039700 | -1.97477800 |
| C  | 6.95462400  | 0.87678900  | -2.41221100 |
| C  | 5.64126600  | 0.96916800  | -1.99653600 |
| C  | 5.07496500  | -0.00118500 | -1.11981800 |
| C  | 5.90264900  | -1.10321800 | -0.70920800 |
| C  | 7.25665600  | -1.16090100 | -1.14471800 |
| C  | 3.71034500  | 0.06629200  | -0.66388900 |
| C  | 3.21066900  | -1.00406700 | 0.07371100  |
| C  | 4.02453500  | -2.09130600 | 0.47699400  |
| C  | 5.34814400  | -2.12857200 | 0.10903100  |
| C  | 2.80976200  | 1.21307500  | -0.97735000 |
| C  | 3.11633900  | 2.56925500  | -0.60081100 |
| C  | 2.21688100  | 3.62584700  | -0.97921300 |
| C  | 1.02235000  | 3.30967200  | -1.68499200 |
| C  | 0.69594200  | 2.00334400  | -1.96386200 |
| C  | 1.58777200  | 0.96857300  | -1.59638400 |
| C  | 4.25772500  | 2.91177300  | 0.18198500  |
| C  | 4.51181500  | 4.22003900  | 0.54206200  |
| C  | 3.64378600  | 5.26307900  | 0.13371500  |
| C  | 2.51970700  | 4.96711800  | -0.60858500 |
| O  | 1.89922800  | -1.01274600 | 0.47906200  |
| O  | 1.20897100  | -0.33498800 | -1.86109900 |
| H  | -1.00434200 | 5.06034900  | 0.13594500  |
| H  | -2.32418200 | 5.45594200  | -1.92941400 |

|   |             |             |             |
|---|-------------|-------------|-------------|
| H | -4.29767200 | 3.98870800  | -2.46628300 |
| H | -1.60966900 | 3.21816800  | 1.70421000  |
| H | -2.79818500 | 0.08857900  | 2.60770200  |
| H | -7.02231800 | -0.69377200 | -0.63498100 |
| H | -7.00875800 | -3.16554900 | -0.16896300 |
| H | -5.20133500 | -4.17313300 | 1.20756700  |
| H | -3.34368700 | -2.75303100 | 2.09500800  |
| H | -3.69347700 | 2.33299300  | 3.23995400  |
| H | -5.17246900 | 2.83813400  | 2.36865100  |
| H | -5.07226100 | 1.20513900  | 3.09609500  |
| H | 8.81783300  | -0.24763600 | -2.30606000 |
| H | 7.36152100  | 1.63217500  | -3.08954000 |
| H | 5.02209200  | 1.79277900  | -2.35286100 |
| H | 7.87489900  | -2.00017100 | -0.81429100 |
| H | 3.57228100  | -2.87546400 | 1.08578600  |
| H | 5.98591100  | -2.95853500 | 0.42403000  |
| H | 0.34618200  | 4.11579700  | -1.97486700 |
| H | -0.24117000 | 1.73513700  | -2.45454500 |
| H | 4.93501400  | 2.12394000  | 0.51255600  |
| H | 5.39004400  | 4.45278800  | 1.14978800  |
| H | 3.86172400  | 6.29564800  | 0.41778500  |
| H | 1.83311800  | 5.76019700  | -0.91732800 |
| C | 3.57175000  | -1.41583600 | 4.61527300  |
| C | 3.39319900  | -0.46423600 | 3.62742100  |
| C | 2.19215900  | 0.28980000  | 3.56996500  |
| C | 1.17390000  | 0.04320300  | 4.54398600  |
| C | 1.40646800  | -0.91941700 | 5.56418800  |
| C | 2.57259800  | -1.66011300 | 5.58938100  |
| H | 4.49824500  | -1.99603900 | 4.63521600  |
| H | 4.15925700  | -0.29799100 | 2.86663600  |
| H | 0.39323400  | 0.78869600  | 4.70745900  |
| H | 0.63889700  | -1.06596900 | 6.32859400  |
| H | 2.73598500  | -2.41494100 | 6.36185300  |
| N | 1.96996000  | 1.16439500  | 2.55032600  |
| H | 2.65949700  | 1.12791800  | 1.80549800  |
| C | 0.62140600  | 1.43964500  | 2.08960700  |
| H | 0.12604800  | 2.18077900  | 2.73974600  |
| H | 0.68286200  | 1.87383900  | 1.08507400  |
| C | -0.23341600 | 0.18244600  | 2.12927900  |
| C | -0.24710100 | -0.71227500 | 3.03875900  |
| H | -0.58828900 | -1.64192300 | 3.47269800  |
| P | 0.57509800  | -1.18872200 | -0.56617200 |
| N | 0.58897700  | -2.73345700 | -1.17422200 |
| C | 1.64731300  | -3.15982500 | -2.13291600 |

|   |             |             |             |
|---|-------------|-------------|-------------|
| C | 1.15187500  | -3.15597200 | -3.58454500 |
| C | 2.33325100  | -4.47275900 | -1.75420800 |
| H | 2.42047700  | -2.38189500 | -2.07204000 |
| H | 0.63546500  | -2.21160900 | -3.81061800 |
| H | 2.01132600  | -3.25047500 | -4.26848700 |
| H | 0.46461300  | -3.98750800 | -3.79492700 |
| H | 2.71741300  | -4.44040200 | -0.72471400 |
| H | 1.66342100  | -5.33912300 | -1.85502800 |
| H | 3.18867400  | -4.63482400 | -2.42940500 |
| C | -0.46169900 | -3.63390400 | -0.62326900 |
| C | 0.02821400  | -4.49158500 | 0.55126700  |
| C | -1.18892700 | -4.45389800 | -1.68691400 |
| H | -1.21607000 | -2.94651600 | -0.20553500 |
| H | 0.55201900  | -3.86897000 | 1.29422200  |
| H | -0.83641300 | -4.95876800 | 1.05100300  |
| H | 0.70613200  | -5.29772500 | 0.23760300  |
| H | -1.58730800 | -3.80351300 | -2.47867600 |
| H | -0.54208000 | -5.21880100 | -2.14123600 |
| H | -2.03878500 | -4.97388300 | -1.21667400 |
| I | -2.60493700 | -0.55454000 | -2.00637100 |

**TS-2'**

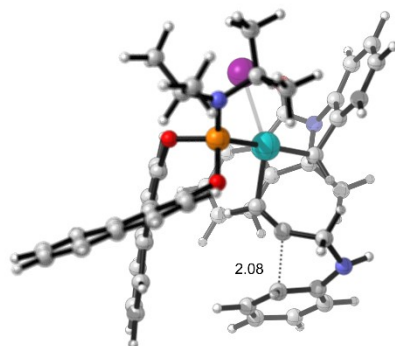

|   |             |             |             |
|---|-------------|-------------|-------------|
| C | -1.54565800 | 3.69022800  | -2.06292200 |
| C | -2.19372800 | 3.36205100  | -3.26552900 |
| C | -3.23284000 | 2.42581200  | -3.27678200 |
| C | -3.59307800 | 1.83151700  | -2.06663800 |
| C | -2.93078700 | 2.13662600  | -0.86954500 |
| C | -1.91119200 | 3.08652500  | -0.85259500 |
| C | -4.65645400 | 0.81874500  | -1.81008300 |
| N | -4.64267200 | 0.62309900  | -0.43772300 |
| C | -3.60556300 | 1.41309300  | 0.27516100  |
| C | -4.91443700 | -0.55260300 | 0.27324600  |
| C | -3.91518700 | -0.72651300 | 1.26028400  |
| C | -2.88486700 | 0.33994500  | 1.13346900  |

|    |             |             |             |
|----|-------------|-------------|-------------|
| C  | -5.93952800 | -1.47436800 | 0.08207200  |
| C  | -5.97435200 | -2.59380300 | 0.92927900  |
| C  | -5.01368400 | -2.76901100 | 1.93554700  |
| C  | -3.97850600 | -1.83699300 | 2.10627800  |
| C  | -4.27573100 | 2.44557400  | 1.20771500  |
| O  | -5.38666500 | 0.25544800  | -2.60743000 |
| Pd | -1.10305100 | -0.59467200 | 0.47946500  |
| C  | 8.20381900  | -0.34055500 | -0.60208900 |
| C  | 7.37531800  | 0.32640700  | -1.53848800 |
| C  | 6.00640100  | 0.36813500  | -1.36401300 |
| C  | 5.38472900  | -0.25451100 | -0.24219900 |
| C  | 6.22656700  | -0.95989900 | 0.68614700  |
| C  | 7.63567000  | -0.97379700 | 0.48349000  |
| C  | 3.95974200  | -0.22909900 | -0.03040100 |
| C  | 3.43805200  | -0.98424300 | 1.01730800  |
| C  | 4.26800500  | -1.67915500 | 1.93237500  |
| C  | 5.63344900  | -1.65140400 | 1.78013500  |
| C  | 3.03569600  | 0.53077900  | -0.92007100 |
| C  | 3.13609900  | 1.95352100  | -1.12039700 |
| C  | 2.24037500  | 2.59962000  | -2.04137000 |
| C  | 1.25255000  | 1.82929200  | -2.71781200 |
| C  | 1.11107800  | 0.48710500  | -2.45727200 |
| C  | 1.99344500  | -0.14210100 | -1.54847700 |
| C  | 4.06046200  | 2.76782900  | -0.40291400 |
| C  | 4.11774800  | 4.13268700  | -0.60453400 |
| C  | 3.25498200  | 4.76150500  | -1.53700800 |
| C  | 2.33530100  | 4.00727600  | -2.23575500 |
| O  | 2.08463200  | -1.04859400 | 1.22983000  |
| O  | 1.77166700  | -1.47635800 | -1.25461300 |
| H  | -0.73673000 | 4.42490900  | -2.06894200 |
| H  | -1.88496800 | 3.84640200  | -4.19547800 |
| H  | -3.75828100 | 2.16405200  | -4.19845200 |
| H  | -1.40452500 | 3.35841900  | 0.07401500  |
| H  | -2.57797600 | 0.75721700  | 2.09833100  |
| H  | -6.67636800 | -1.32719900 | -0.70789800 |
| H  | -6.76631700 | -3.33661600 | 0.80242000  |
| H  | -5.06779000 | -3.64410200 | 2.58845100  |
| H  | -3.21121400 | -1.98984500 | 2.87052200  |
| H  | -3.50104300 | 3.03915200  | 1.71761200  |
| H  | -4.92424300 | 3.12732300  | 0.63610800  |
| H  | -4.88415900 | 1.93418800  | 1.96993700  |
| H  | 9.28656000  | -0.36130900 | -0.74977000 |
| H  | 7.82377700  | 0.80789300  | -2.41149400 |
| H  | 5.38790600  | 0.87741300  | -2.10330600 |



|   |             |             |             |
|---|-------------|-------------|-------------|
| H | 8.26031900  | -1.50805200 | 1.20485300  |
| H | 3.79100300  | -2.22446100 | 2.74871900  |
| H | 6.27899800  | -2.17891100 | 2.48717200  |
| H | 0.58030400  | 2.32463200  | -3.41989700 |
| H | 0.32214500  | -0.11208800 | -2.91513400 |
| H | 4.72492200  | 2.30399400  | 0.32630400  |
| H | 4.83041200  | 4.73444100  | -0.03474000 |
| H | 3.31381500  | 5.84188500  | -1.69127100 |
| H | 1.65449000  | 4.48077100  | -2.94808800 |
| C | -0.94915300 | 5.68078300  | 2.06803800  |
| C | -1.39326100 | 4.81925900  | 3.05880700  |
| C | -0.64242500 | 3.65720100  | 3.35123200  |
| C | 0.61531200  | 3.43460500  | 2.68993300  |
| C | 1.02983300  | 4.34496500  | 1.67593700  |
| C | 0.24920100  | 5.43508600  | 1.34804000  |
| H | -1.55437300 | 6.55582900  | 1.81606800  |
| H | -2.34518800 | 4.98800900  | 3.56804100  |
| H | 1.40551600  | 2.87392400  | 3.19959200  |
| H | 1.98373100  | 4.17257900  | 1.17191100  |
| H | 0.56109100  | 6.12342800  | 0.55976200  |
| N | -1.12110100 | 2.60529100  | 4.07138600  |
| H | -2.10334600 | 2.60519200  | 4.33018900  |
| C | -0.51006400 | 1.34028900  | 3.68001000  |
| H | 0.35841800  | 1.09114100  | 4.31406300  |
| H | -1.23002600 | 0.51208900  | 3.75605600  |
| C | -0.05473000 | 1.51545700  | 2.25757800  |
| C | -0.06553700 | 1.09000600  | 1.05285000  |
| H | 0.39410300  | 1.54831200  | 0.17525200  |
| P | 0.94808300  | -1.74394900 | 0.18575100  |
| N | 1.07713000  | -3.39348800 | 0.32188200  |
| C | 2.32528700  | -4.07678100 | -0.12040000 |
| C | 2.17307600  | -4.74066000 | -1.49468900 |
| C | 2.91321000  | -5.02704700 | 0.92285300  |
| H | 3.06124800  | -3.27163700 | -0.25213900 |
| H | 1.71188300  | -4.04197600 | -2.20790900 |
| H | 3.16695700  | -5.02096800 | -1.88080000 |
| H | 1.56223000  | -5.65317400 | -1.45390100 |
| H | 3.04575500  | -4.52601900 | 1.89261700  |
| H | 2.28919300  | -5.92064300 | 1.07016500  |
| H | 3.90347600  | -5.36658300 | 0.57927600  |
| C | -0.07588700 | -4.07415800 | 0.97168900  |
| C | 0.13087800  | -4.34073700 | 2.46877600  |
| C | -0.55509000 | -5.31400800 | 0.21883500  |
| H | -0.89625500 | -3.34232600 | 0.90099100  |

|   |             |             |             |
|---|-------------|-------------|-------------|
| H | 0.50382900  | -3.43730300 | 2.97712800  |
| H | -0.83340800 | -4.61435100 | 2.92788800  |
| H | 0.83424900  | -5.16243700 | 2.66428200  |
| H | -0.73303200 | -5.08329700 | -0.84113200 |
| H | 0.15991500  | -6.14737400 | 0.29007500  |
| H | -1.50745100 | -5.65367000 | 0.65654700  |
| I | -2.24147800 | -2.05822400 | -1.65806300 |

#### INT-4

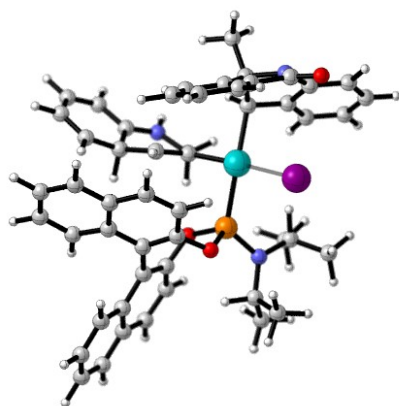

|    |             |             |             |
|----|-------------|-------------|-------------|
| C  | -1.63829800 | 3.75741500  | -2.31066200 |
| C  | -2.39185100 | 3.38033000  | -3.43462700 |
| C  | -3.50298900 | 2.54208900  | -3.29193000 |
| C  | -3.82672800 | 2.09372800  | -2.01142000 |
| C  | -3.06108700 | 2.44481100  | -0.89107400 |
| C  | -1.96966900 | 3.29921200  | -1.02780800 |
| C  | -4.93125400 | 1.18159100  | -1.59718600 |
| N  | -4.81536000 | 1.07725100  | -0.22109700 |
| C  | -3.69416600 | 1.86573200  | 0.35594100  |
| C  | -5.07617200 | -0.04031900 | 0.58450600  |
| C  | -4.01726300 | -0.19141100 | 1.51109700  |
| C  | -2.95660300 | 0.83209200  | 1.25820900  |
| C  | -6.14329600 | -0.93101600 | 0.51372900  |
| C  | -6.16421600 | -2.00122000 | 1.42317000  |
| C  | -5.14466100 | -2.15299900 | 2.37235200  |
| C  | -4.06847500 | -1.25210100 | 2.42050100  |
| C  | -4.25627400 | 3.01276100  | 1.22177100  |
| O  | -5.75809700 | 0.61699500  | -2.29449300 |
| Pd | -1.28650500 | -0.26300000 | 0.52079200  |
| C  | 7.91193600  | -1.62279400 | -1.01379600 |
| C  | 7.18981300  | -0.79591900 | -1.91001700 |
| C  | 5.86973300  | -0.47514300 | -1.66435000 |
| C  | 5.19338300  | -0.96245200 | -0.50760800 |
| C  | 5.92010900  | -1.83005000 | 0.37995600  |

|   |             |             |             |
|---|-------------|-------------|-------------|
| C | 7.28409900  | -2.13100100 | 0.10416000  |
| C | 3.81667400  | -0.64834300 | -0.22291300 |
| C | 3.20450500  | -1.28994900 | 0.85287200  |
| C | 3.92335400  | -2.14078500 | 1.72971100  |
| C | 5.25650800  | -2.39007600 | 1.50799400  |
| C | 3.01704600  | 0.29200400  | -1.05917100 |
| C | 3.39352700  | 1.66599700  | -1.26823600 |
| C | 2.58194000  | 2.49678900  | -2.11667400 |
| C | 1.40142000  | 1.95972100  | -2.70344100 |
| C | 1.01019500  | 0.66902000  | -2.43678400 |
| C | 1.81937000  | -0.14768100 | -1.61272600 |
| C | 4.52110900  | 2.26171200  | -0.63096300 |
| C | 4.85079200  | 3.58482500  | -0.84816900 |
| C | 4.06992300  | 4.39021000  | -1.71449000 |
| C | 2.95616200  | 3.85476600  | -2.32809500 |
| O | 1.87587700  | -1.09159900 | 1.12510300  |
| O | 1.37600100  | -1.42793500 | -1.33651200 |
| H | -0.77667600 | 4.41759000  | -2.43805300 |
| H | -2.10780400 | 3.74733300  | -4.42427200 |
| H | -4.10709200 | 2.24158400  | -4.15146600 |
| H | -1.37969800 | 3.59796000  | -0.15987700 |
| H | -2.62351100 | 1.32108300  | 2.18253900  |
| H | -6.92429200 | -0.79651400 | -0.23513900 |
| H | -6.98773300 | -2.71950400 | 1.38952400  |
| H | -5.18270600 | -2.98704200 | 3.07855700  |
| H | -3.25936100 | -1.39658200 | 3.14217300  |
| H | -3.42643900 | 3.61347100  | 1.62549900  |
| H | -4.91220600 | 3.67011900  | 0.62947500  |
| H | -4.83449300 | 2.60474200  | 2.06563000  |
| H | 8.95806400  | -1.86474700 | -1.21795400 |
| H | 7.68082500  | -0.41224000 | -2.80816300 |
| H | 5.33032900  | 0.15394000  | -2.37262600 |
| H | 7.82336000  | -2.78499700 | 0.79517300  |
| H | 3.38716500  | -2.58443700 | 2.57043200  |
| H | 5.81684000  | -3.04151500 | 2.18372500  |
| H | 0.78925400  | 2.59618300  | -3.34495500 |
| H | 0.08080900  | 0.25252000  | -2.82907400 |
| H | 5.12764200  | 1.66137400  | 0.04726500  |
| H | 5.71779100  | 4.01714400  | -0.34203500 |
| H | 4.34404800  | 5.43475400  | -1.88254600 |
| H | 2.33425500  | 4.46961900  | -2.98449500 |
| C | 1.71288300  | 5.15878500  | 3.60749000  |
| C | 1.15973000  | 4.06349300  | 4.21154200  |
| C | 0.97580300  | 2.86224900  | 3.45565500  |

|   |             |             |             |
|---|-------------|-------------|-------------|
| C | 1.51441300  | 2.75291700  | 2.06171600  |
| C | 2.01516300  | 4.03267300  | 1.48428600  |
| C | 2.12461100  | 5.16019300  | 2.22240700  |
| H | 1.82763400  | 6.07955700  | 4.18615700  |
| H | 0.81020500  | 4.09989500  | 5.24593100  |
| H | 2.42489500  | 2.11284000  | 2.15856200  |
| H | 2.33232900  | 4.00279900  | 0.43973800  |
| H | 2.52526700  | 6.07903300  | 1.78938300  |
| N | 0.32072200  | 1.83145200  | 3.93412700  |
| H | -0.05055500 | 1.88722000  | 4.88274100  |
| C | -0.02123500 | 0.64337400  | 3.14095500  |
| H | 0.78458000  | -0.10620400 | 3.25106500  |
| H | -0.93114000 | 0.21409500  | 3.58195400  |
| C | -0.17229400 | 0.96013900  | 1.67403000  |
| C | 0.54292900  | 1.96933000  | 1.16760600  |
| H | 0.54746000  | 2.23247700  | 0.10868400  |
| P | 0.58817000  | -1.60398000 | 0.13735500  |
| N | 0.51216900  | -3.26194400 | 0.25378600  |
| C | 1.60469300  | -4.10464700 | -0.30646100 |
| C | 1.24244900  | -4.69738500 | -1.67432800 |
| C | 2.13235100  | -5.16206200 | 0.66389200  |
| H | 2.43695500  | -3.41109500 | -0.48688200 |
| H | 0.82745500  | -3.91777800 | -2.32942600 |
| H | 2.14894500  | -5.10343900 | -2.15288800 |
| H | 0.51017000  | -5.51355600 | -1.59869100 |
| H | 2.42865900  | -4.71458500 | 1.62338200  |
| H | 1.39611100  | -5.95570300 | 0.85731400  |
| H | 3.02391800  | -5.63746300 | 0.22443200  |
| C | -0.66044500 | -3.79235700 | 1.00164100  |
| C | -0.35936100 | -4.08987600 | 2.47695900  |
| C | -1.35948900 | -4.95624100 | 0.30211000  |
| H | -1.38251700 | -2.95989000 | 0.99898500  |
| H | 0.17072000  | -3.24399600 | 2.94324500  |
| H | -1.30616400 | -4.23737800 | 3.02228400  |
| H | 0.24795700  | -4.99575200 | 2.61461700  |
| H | -1.61483000 | -4.69160900 | -0.73363700 |
| H | -0.75012700 | -5.87244200 | 0.30024000  |
| H | -2.29670600 | -5.18365000 | 0.83455600  |
| I | -2.59435200 | -1.60032700 | -1.63694900 |

K<sub>2</sub>CO<sub>3</sub>

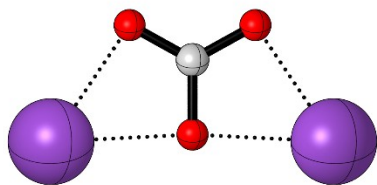

|   |             |             |             |
|---|-------------|-------------|-------------|
| C | 0.00030900  | 0.82326200  | 0.00003800  |
| O | 0.00068100  | -0.50467800 | -0.00000500 |
| O | 1.12314100  | 1.44349600  | -0.00006300 |
| O | -1.12259700 | 1.44345200  | 0.00002600  |
| K | -2.52484700 | -0.63138600 | -0.00000800 |
| K | 2.52423400  | -0.63165300 | 0.00001300  |

### KHCO<sub>3</sub>

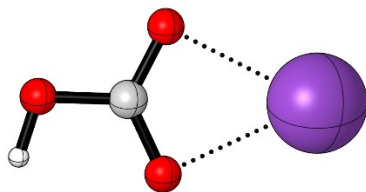

|   |             |             |             |
|---|-------------|-------------|-------------|
| C | -1.02058800 | -0.03715900 | 0.00081600  |
| O | -0.48858100 | 1.10421900  | 0.00193400  |
| O | -0.44540000 | -1.14786700 | 0.00172300  |
| O | -2.39515700 | -0.08134200 | -0.00207900 |
| H | -2.69420100 | 0.84252100  | -0.00253300 |
| K | 1.86583300  | 0.02001900  | -0.00078900 |

### INT-5

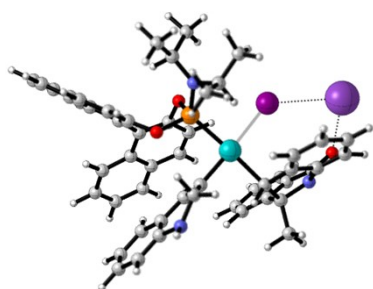

|   |             |            |             |
|---|-------------|------------|-------------|
| C | -1.15856900 | 4.02058600 | -1.95716100 |
| C | -1.94021700 | 3.70699100 | -3.08227100 |
| C | -3.10959900 | 2.95340400 | -2.94280300 |
| C | -3.45886300 | 2.52045600 | -1.66226600 |
| C | -2.66700000 | 2.80670700 | -0.54000500 |
| C | -1.51754400 | 3.58208800 | -0.67559000 |
| C | -4.61332700 | 1.69171800 | -1.24352100 |
| N | -4.53229200 | 1.58932800 | 0.12063900  |

|    |             |             |             |
|----|-------------|-------------|-------------|
| C  | -3.32574300 | 2.24875600  | 0.70259800  |
| C  | -4.90275600 | 0.49236600  | 0.92114100  |
| C  | -3.82184600 | 0.17810700  | 1.77639500  |
| C  | -2.67120900 | 1.10093900  | 1.53575100  |
| C  | -6.09716500 | -0.22454600 | 0.91924000  |
| C  | -6.20246200 | -1.32782700 | 1.78493500  |
| C  | -5.14076700 | -1.66415000 | 2.63579800  |
| C  | -3.95633600 | -0.91081200 | 2.64488000  |
| C  | -3.75601300 | 3.40170400  | 1.62876000  |
| O  | -5.46125900 | 1.14333500  | -1.95446800 |
| Pd | -1.09776600 | -0.09547200 | 0.72525800  |
| C  | 7.83719000  | -2.16226600 | -1.49821600 |
| C  | 7.09169300  | -1.34172000 | -2.38122400 |
| C  | 5.82627500  | -0.90832100 | -2.03984100 |
| C  | 5.23096500  | -1.27047500 | -0.79591800 |
| C  | 5.97643000  | -2.13344900 | 0.08015600  |
| C  | 7.28455200  | -2.55146100 | -0.29588500 |
| C  | 3.91255900  | -0.83612700 | -0.41325400 |
| C  | 3.35727600  | -1.36819500 | 0.74914100  |
| C  | 4.09562100  | -2.21172100 | 1.61665100  |
| C  | 5.38370600  | -2.57016000 | 1.29859800  |
| C  | 3.11447800  | 0.12078000  | -1.23119000 |
| C  | 3.57093100  | 1.44878100  | -1.55008400 |
| C  | 2.73828000  | 2.30387600  | -2.35274100 |
| C  | 1.46936000  | 1.83563800  | -2.79572400 |
| C  | 1.01655000  | 0.58918200  | -2.43364800 |
| C  | 1.84216100  | -0.25043200 | -1.65013200 |
| C  | 4.79941500  | 1.98055600  | -1.06109500 |
| C  | 5.19795600  | 3.26475600  | -1.37261400 |
| C  | 4.38766500  | 4.09509500  | -2.18616400 |
| C  | 3.18160500  | 3.62188900  | -2.65972100 |
| O  | 2.07237600  | -1.06622100 | 1.11893300  |
| O  | 1.33789300  | -1.48136500 | -1.26934900 |
| H  | -0.24856400 | 4.61239800  | -2.08328300 |
| H  | -1.63209100 | 4.05943300  | -4.06988700 |
| H  | -3.73755800 | 2.70744200  | -3.80251500 |
| H  | -0.90280300 | 3.83035100  | 0.18996200  |
| H  | -2.28444800 | 1.51244300  | 2.47574000  |
| H  | -6.93337600 | 0.08423700  | 0.28778500  |
| H  | -7.12602200 | -1.91215300 | 1.80488700  |
| H  | -5.23951300 | -2.51962800 | 3.30943800  |
| H  | -3.13201500 | -1.18570900 | 3.30856200  |
| H  | -2.86114000 | 3.89166800  | 2.04163400  |
| H  | -4.35081200 | 4.15150200  | 1.08358700  |

|   |             |             |             |
|---|-------------|-------------|-------------|
| H | -4.35656800 | 3.01304400  | 2.46597400  |
| H | 8.84085900  | -2.49271100 | -1.77781600 |
| H | 7.52054800  | -1.05266900 | -3.34437900 |
| H | 5.26534300  | -0.28587700 | -2.73752500 |
| H | 7.84091400  | -3.19892800 | 0.38773700  |
| H | 3.61102000  | -2.55818700 | 2.53112400  |
| H | 5.95956500  | -3.21423700 | 1.96835500  |
| H | 0.84222200  | 2.49270400  | -3.40101100 |
| H | 0.02718400  | 0.22673000  | -2.71784200 |
| H | 5.42695900  | 1.36771100  | -0.41444300 |
| H | 6.14066100  | 3.64945000  | -0.97514200 |
| H | 4.71375000  | 5.11070600  | -2.42450800 |
| H | 2.53798600  | 4.25715200  | -3.27452900 |
| C | 3.55080800  | 4.41734100  | 3.56514100  |
| C | 2.61666800  | 3.58066200  | 4.18871700  |
| C | 1.75278000  | 2.77736400  | 3.42218500  |
| C | 1.83533100  | 2.82550700  | 2.00007800  |
| C | 2.77831500  | 3.67205000  | 1.40086900  |
| C | 3.64001000  | 4.46599400  | 2.16940400  |
| H | 4.21557100  | 5.03034100  | 4.18083600  |
| H | 2.54898500  | 3.54482100  | 5.28046000  |
| H | 2.83353600  | 3.70157000  | 0.30968800  |
| H | 4.37198400  | 5.11407700  | 1.68046700  |
| N | 0.77390700  | 1.98722800  | 3.99464200  |
| H | 0.82844700  | 1.89112300  | 5.00421200  |
| C | 0.26464900  | 0.81138800  | 3.29114100  |
| H | 0.93565200  | -0.07091600 | 3.41074300  |
| H | -0.69801200 | 0.52954000  | 3.74636700  |
| C | 0.11500300  | 1.07609400  | 1.81239900  |
| C | 0.89416000  | 2.01050600  | 1.22899800  |
| H | 0.87892700  | 2.16313500  | 0.14646600  |
| P | 0.68107900  | -1.52996800 | 0.27670100  |
| N | 0.49375000  | -3.17299300 | 0.47811400  |
| C | 1.48171700  | -4.11748000 | -0.11081600 |
| C | 0.97441000  | -4.75317100 | -1.41196900 |
| C | 2.01294200  | -5.15754500 | 0.87682600  |
| H | 2.34166100  | -3.49520600 | -0.39306800 |
| H | 0.55782300  | -3.98056500 | -2.07478300 |
| H | 1.81083900  | -5.24401300 | -1.93639500 |
| H | 0.20057400  | -5.51284600 | -1.23330900 |
| H | 2.41421000  | -4.68090300 | 1.78265100  |
| H | 1.24251500  | -5.88409300 | 1.17351800  |
| H | 2.83209500  | -5.71873100 | 0.39937600  |
| C | -0.65346100 | -3.58170800 | 1.33224600  |

|   |             |             |             |
|---|-------------|-------------|-------------|
| C | -0.26730500 | -3.82044300 | 2.79811500  |
| C | -1.47712500 | -4.73043600 | 0.75079200  |
| H | -1.31923800 | -2.70286800 | 1.33009500  |
| H | 0.33273400  | -2.98038900 | 3.18260100  |
| H | -1.17980700 | -3.89333500 | 3.41266300  |
| H | 0.30509100  | -4.74780000 | 2.94190800  |
| H | -1.78280500 | -4.50774500 | -0.28131500 |
| H | -0.93334100 | -5.68675700 | 0.76438100  |
| H | -2.38912500 | -4.85745300 | 1.35608100  |
| I | -2.57763000 | -1.45395400 | -1.38825000 |
| K | -5.84629000 | -1.36847600 | -2.36778900 |

### INT-6

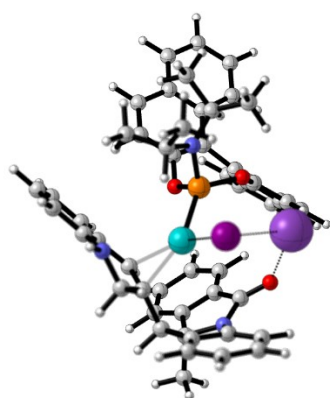

|    |             |             |             |
|----|-------------|-------------|-------------|
| C  | 0.56711100  | 2.75089700  | 3.62535000  |
| C  | 1.33987300  | 3.02730300  | 2.48509600  |
| C  | 0.73724400  | 3.12220500  | 1.22845400  |
| C  | -0.63972700 | 2.91172300  | 1.14162000  |
| C  | -1.41195000 | 2.60366100  | 2.27177400  |
| C  | -0.81702100 | 2.55280200  | 3.53219900  |
| C  | -1.51550300 | 2.94444000  | -0.05694300 |
| N  | -2.79009400 | 2.79640000  | 0.41807800  |
| C  | -2.86932600 | 2.49682200  | 1.87305500  |
| C  | -3.94718300 | 2.32023200  | -0.21774900 |
| C  | -4.59595800 | 1.42041400  | 0.64701200  |
| C  | -3.72315600 | 1.16239300  | 1.88182400  |
| C  | -4.47040200 | 2.67952000  | -1.45731000 |
| C  | -5.70444600 | 2.12345900  | -1.82468400 |
| C  | -6.38779300 | 1.26239800  | -0.95961900 |
| C  | -5.83832100 | 0.90915800  | 0.28445200  |
| C  | -3.66838000 | 3.59540400  | 2.59878100  |
| O  | -1.20005500 | 3.04921400  | -1.24512600 |
| Pd | -1.51667900 | -0.40028400 | 0.18079000  |
| C  | 7.78135400  | -1.81180200 | -0.32645300 |
| C  | 7.42332900  | -0.64139000 | -1.04089300 |



|   |             |             |             |
|---|-------------|-------------|-------------|
| C | 6.16221900  | -0.09485700 | -0.91010200 |
| C | 5.18297800  | -0.69002500 | -0.06215500 |
| C | 5.53859600  | -1.89918000 | 0.63157200  |
| C | 6.85359400  | -2.42628900 | 0.48830200  |
| C | 3.85376800  | -0.15528600 | 0.09201200  |
| C | 2.92474800  | -0.90823300 | 0.79651400  |
| C | 3.27344300  | -2.09128900 | 1.49153000  |
| C | 4.56402700  | -2.56155900 | 1.43034300  |
| C | 3.44705200  | 1.15304100  | -0.49617500 |
| C | 4.18438900  | 2.35179100  | -0.16745200 |
| C | 3.91187100  | 3.57977200  | -0.86045600 |
| C | 2.88163600  | 3.59959300  | -1.83932900 |
| C | 2.11102700  | 2.48480200  | -2.05357400 |
| C | 2.34959100  | 1.27099800  | -1.35316100 |
| C | 5.17124000  | 2.38128300  | 0.86239300  |
| C | 5.85911900  | 3.53982700  | 1.16491500  |
| C | 5.60941000  | 4.73807400  | 0.45107800  |
| C | 4.65047500  | 4.75316900  | -0.53975500 |
| O | 1.61519500  | -0.50644900 | 0.82330400  |
| O | 1.48767100  | 0.24151400  | -1.63686000 |
| H | 1.05349700  | 2.68881600  | 4.60222800  |
| H | 2.41857400  | 3.17403000  | 2.58034400  |
| H | 1.31807700  | 3.34912200  | 0.33586500  |
| H | -1.40776000 | 2.33408900  | 4.42453400  |
| H | -4.34879200 | 1.15859900  | 2.79185900  |
| H | -3.94758700 | 3.38721600  | -2.10227500 |
| H | -6.14219500 | 2.38036500  | -2.79253800 |
| H | -7.35881300 | 0.85720700  | -1.25449300 |
| H | -6.38248300 | 0.23955700  | 0.95388500  |
| H | -3.67433900 | 3.39201300  | 3.67994900  |
| H | -3.20862200 | 4.57989300  | 2.42736900  |
| H | -4.71012100 | 3.62536700  | 2.24562200  |
| H | 8.78558100  | -2.22994400 | -0.43298300 |
| H | 8.15109200  | -0.16913000 | -1.70603400 |
| H | 5.90454900  | 0.80111100  | -1.47543900 |
| H | 7.10968500  | -3.34037700 | 1.03120100  |
| H | 2.49565200  | -2.60657100 | 2.05733100  |
| H | 4.84680100  | -3.47129600 | 1.96617000  |
| H | 2.68434500  | 4.52057000  | -2.39339000 |
| H | 1.29958300  | 2.52097400  | -2.77835400 |
| H | 5.37620700  | 1.47566000  | 1.43290800  |
| H | 6.60129400  | 3.53240300  | 1.96755700  |
| H | 6.16683100  | 5.64583500  | 0.69559700  |
| H | 4.43011800  | 5.67325800  | -1.08804900 |

|   |             |             |             |
|---|-------------|-------------|-------------|
| C | -0.78322900 | -4.42043000 | 3.75126400  |
| C | -1.94600600 | -4.20648400 | 3.00538400  |
| C | -2.28144300 | -2.91364700 | 2.56335400  |
| C | -1.43144500 | -1.82211300 | 2.88961500  |
| C | -0.27409800 | -2.06074200 | 3.64487200  |
| C | 0.05917600  | -3.34916200 | 4.07782600  |
| H | -0.53588600 | -5.43367400 | 4.08021600  |
| H | -2.60015900 | -5.04420000 | 2.74620200  |
| H | 0.38054200  | -1.21588300 | 3.87755800  |
| H | 0.96737500  | -3.51580400 | 4.66248400  |
| N | -3.36988400 | -2.66600100 | 1.75141200  |
| H | -3.99716700 | -3.45171600 | 1.61114100  |
| C | -4.03012500 | -1.36795100 | 1.76883700  |
| H | -4.65006900 | -1.30291900 | 0.86507400  |
| H | -4.71998900 | -1.27546900 | 2.64270700  |
| C | -3.03408200 | -0.21404500 | 1.81657200  |
| C | -1.77945400 | -0.48282400 | 2.39254600  |
| H | -1.16074600 | 0.32180800  | 2.77855600  |
| P | 0.59771400  | -0.73758400 | -0.52248400 |
| N | 0.96970500  | -2.22939400 | -1.22002200 |
| C | 2.17690600  | -2.45342300 | -2.06066200 |
| C | 1.89426500  | -2.28973200 | -3.56251300 |
| C | 2.91910900  | -3.75945800 | -1.76700900 |
| H | 2.87008200  | -1.64908300 | -1.79486600 |
| H | 1.32602100  | -1.36621800 | -3.74826000 |
| H | 2.84798400  | -2.21696200 | -4.11142600 |
| H | 1.33195000  | -3.13469800 | -3.98379900 |
| H | 3.15917000  | -3.85169200 | -0.69966700 |
| H | 2.35071600  | -4.64736200 | -2.07976000 |
| H | 3.86815200  | -3.76088300 | -2.32711100 |
| C | -0.05063700 | -3.28398500 | -0.96992700 |
| C | 0.32679900  | -4.24298300 | 0.16556000  |
| C | -0.50920500 | -4.02340200 | -2.22667600 |
| H | -0.93293300 | -2.72447600 | -0.61040200 |
| H | 0.60724200  | -3.68278100 | 1.06928400  |
| H | -0.54208800 | -4.86915700 | 0.42183900  |
| H | 1.15530000  | -4.91497700 | -0.10001400 |
| H | -0.82975700 | -3.31814600 | -3.00606400 |
| H | 0.26998200  | -4.68218700 | -2.63836400 |
| H | -1.37606800 | -4.65400000 | -1.97222300 |
| I | -3.32043800 | -1.10127500 | -2.36715200 |
| K | -1.13839100 | 1.35502800  | -3.25567600 |

KI

|   |             |             |            |
|---|-------------|-------------|------------|
| I | -3.67397559 | -4.03195821 | 0.38096354 |
| K | -7.03397559 | -4.03195821 | 0.38096354 |

INT-7

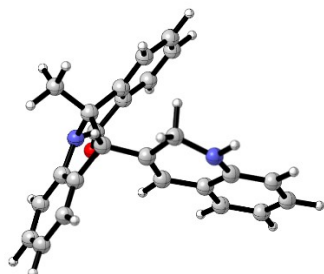

|   |             |             |             |
|---|-------------|-------------|-------------|
| C | 0.56719500  | 2.75119100  | 3.62509700  |
| C | 1.33991700  | 3.02749000  | 2.48478800  |
| C | 0.73724600  | 3.12223700  | 1.22815900  |
| C | -0.63973500 | 2.91178000  | 1.14140700  |
| C | -1.41191400 | 2.60380700  | 2.27160900  |
| C | -0.81693300 | 2.55306800  | 3.53201800  |
| C | -1.51553900 | 2.94443400  | -0.05713600 |
| N | -2.79012800 | 2.79644800  | 0.41793300  |
| C | -2.86928700 | 2.49690800  | 1.87293500  |
| C | -3.94735100 | 2.32038200  | -0.21775100 |
| C | -4.59604700 | 1.42054200  | 0.64706500  |
| C | -3.72311800 | 1.16247100  | 1.88177600  |
| C | -4.47075100 | 2.67972800  | -1.45722100 |
| C | -5.70481200 | 2.12362400  | -1.82448500 |
| C | -6.38806300 | 1.26254700  | -0.95936900 |
| C | -5.83846400 | 0.90930000  | 0.28464700  |
| C | -3.66833000 | 3.59551500  | 2.59864600  |
| O | -1.20000300 | 3.04912200  | -1.24531100 |
| H | 1.05362200  | 2.68920000  | 4.60196100  |
| H | 2.41861900  | 3.17422800  | 2.57998900  |
| H | 1.31804700  | 3.34908400  | 0.33552500  |
| H | -1.40764300 | 2.33442100  | 4.42438800  |
| H | -4.34864000 | 1.15868300  | 2.79189300  |
| H | -3.94804800 | 3.38745400  | -2.10223900 |
| H | -6.14265900 | 2.38053900  | -2.79229300 |
| H | -7.35911000 | 0.85735600  | -1.25415400 |
| H | -6.38255600 | 0.23971000  | 0.95415100  |
| H | -3.67453800 | 3.39197500  | 3.67978400  |
| H | -3.20836100 | 4.57994800  | 2.42747400  |
| H | -4.70998800 | 3.62569000  | 2.24526400  |
| C | -0.78313100 | -4.42060800 | 3.75057500  |

|                |             |             |            |
|----------------|-------------|-------------|------------|
| C              | -1.94594300 | -4.20659100 | 3.00476700 |
| C              | -2.28145600 | -2.91369600 | 2.56297500 |
| C              | -1.43143800 | -1.82219400 | 2.88930000 |
| C              | -0.27406600 | -2.06089200 | 3.64450100 |
| C              | 0.05923500  | -3.34935900 | 4.07729500 |
| H              | -0.53572700 | -5.43389700 | 4.07934700 |
| H              | -2.60004600 | -5.04430800 | 2.74545900 |
| H              | 0.38059200  | -1.21605200 | 3.87723200 |
| H              | 0.96745900  | -3.51606300 | 4.66189500 |
| N              | -3.36998200 | -2.66598900 | 1.75111400 |
| H              | -3.99733700 | -3.45165700 | 1.61091900 |
| C              | -4.03016600 | -1.36789400 | 1.76868800 |
| H              | -4.65016800 | -1.30273600 | 0.86496800 |
| H              | -4.71994200 | -1.27546900 | 2.64262000 |
| C              | -3.03411500 | -0.21403200 | 1.81647800 |
| C              | -1.77944500 | -0.48286800 | 2.39236100 |
| H              | -1.16071300 | 0.32171900  | 2.77840300 |
| H <sub>2</sub> |             |             |            |
| H              | -3.67826486 | -5.52976013 | 0.52693477 |
| H              | -4.27826486 | -5.52976013 | 0.52693477 |

Product

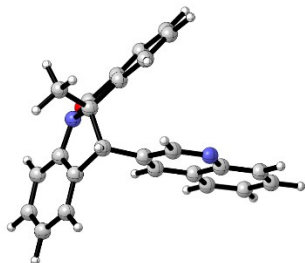

|   |             |             |             |
|---|-------------|-------------|-------------|
| C | -1.27575700 | 3.66499400  | -0.56469000 |
| C | -1.19778000 | 3.84515400  | 0.82653800  |
| C | -0.26713900 | 3.12687300  | 1.58346700  |
| C | 0.57046900  | 2.23374300  | 0.91396300  |
| C | 0.49066600  | 2.04434900  | -0.47201600 |
| C | -0.42767000 | 2.76868600  | -1.22971000 |
| C | 1.58614900  | 1.30849200  | 1.48722500  |
| N | 2.15054500  | 0.66480800  | 0.39266700  |
| C | 1.53491000  | 1.04064500  | -0.90532700 |
| C | 2.60412100  | -0.66379200 | 0.33487200  |
| C | 2.04889100  | -1.29640400 | -0.79272500 |
| C | 1.06732900  | -0.35757900 | -1.48101400 |
| C | 3.44226200  | -1.33673200 | 1.22320800  |

|   |             |             |             |
|---|-------------|-------------|-------------|
| C | 3.74031700  | -2.67836700 | 0.94267500  |
| C | 3.21617500  | -3.31437300 | -0.19038000 |
| C | 2.35784300  | -2.62558000 | -1.06327500 |
| C | 2.57801800  | 1.67405300  | -1.83461500 |
| O | 1.85811400  | 1.09601900  | 2.65569800  |
| H | -2.01371200 | 4.23172100  | -1.13837000 |
| H | -1.87180900 | 4.55147100  | 1.31757600  |
| H | -0.19143900 | 3.25051700  | 2.66645700  |
| H | -0.49885100 | 2.63458900  | -2.31130700 |
| H | 1.19298800  | -0.35868600 | -2.57263600 |
| H | 3.84258400  | -0.82954200 | 2.10120700  |
| H | 4.39757400  | -3.23224900 | 1.61821400  |
| H | 3.47032300  | -4.35789900 | -0.39255500 |
| H | 1.92413700  | -3.13037900 | -1.93043500 |
| H | 2.10213200  | 1.98320300  | -2.77754200 |
| H | 3.03027900  | 2.55746700  | -1.35987400 |
| H | 3.37530900  | 0.95058000  | -2.06625000 |
| C | -4.94005200 | -1.61501600 | 0.76693100  |
| C | -4.48858100 | -1.20314400 | -0.47069100 |
| C | -3.09657200 | -1.02834600 | -0.70769700 |
| C | -2.17163900 | -1.28795000 | 0.35736100  |
| C | -2.66730200 | -1.71308100 | 1.62130500  |
| C | -4.02362200 | -1.87157300 | 1.82112100  |
| H | -6.01120400 | -1.74526900 | 0.94230300  |
| H | -5.17755600 | -1.00076900 | -1.29415200 |
| H | -1.95548800 | -1.90746900 | 2.42831000  |
| H | -4.39941000 | -2.19634700 | 2.79478100  |
| N | -2.67632300 | -0.61914400 | -1.93908000 |
| C | -1.38777700 | -0.45138500 | -2.13733600 |
| C | -0.37877000 | -0.67435800 | -1.15483000 |
| C | -0.79010500 | -1.10177100 | 0.09246800  |
| H | -0.06783600 | -1.29714900 | 0.88925800  |
| H | -1.07879700 | -0.11682700 | -3.13665400 |

## 9. X-ray single crystal diffraction data of 3a

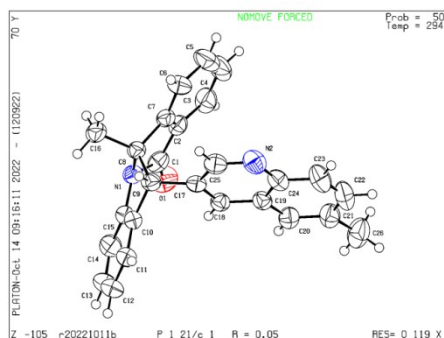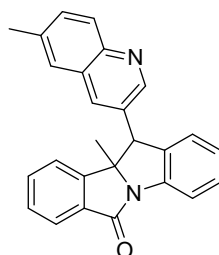

**3a**

|                                                               |                                                  |                                                  |               |
|---------------------------------------------------------------|--------------------------------------------------|--------------------------------------------------|---------------|
| Bond precision:                                               | C-C = 0.0023 Å                                   | Wavelength=0.71073                               |               |
| Cell:                                                         | a=7.1920(5)                                      | b=14.8145(7)                                     | c=18.9231(12) |
|                                                               | alpha=90                                         | beta=96.550(6)                                   | gamma=90      |
| Temperature:                                                  | 294 K                                            |                                                  |               |
|                                                               | Calculated                                       | Reported                                         |               |
| Volume                                                        | 2003.0(2)                                        | 2003.0(2)                                        |               |
| Space group                                                   | P 21/c                                           | P 1 21/c 1                                       |               |
| Hall group                                                    | -P 2ybc                                          | -P 2ybc                                          |               |
| Moiety formula                                                | C <sub>26</sub> H <sub>20</sub> N <sub>2</sub> O | C <sub>26</sub> H <sub>20</sub> N <sub>2</sub> O |               |
| Sum formula                                                   | C <sub>26</sub> H <sub>20</sub> N <sub>2</sub> O | C <sub>26</sub> H <sub>20</sub> N <sub>2</sub> O |               |
| Mr                                                            | 376.44                                           | 376.44                                           |               |
| Dx, g cm <sup>-3</sup>                                        | 1.248                                            | 1.248                                            |               |
| Z                                                             | 4                                                | 4                                                |               |
| Mu (mm <sup>-1</sup> )                                        | 0.077                                            | 0.077                                            |               |
| F000                                                          | 792.0                                            | 792.0                                            |               |
| F000'                                                         | 792.30                                           |                                                  |               |
| h,k,lmax                                                      | 8,18,23                                          | 8,18,23                                          |               |
| Nref                                                          | 4085                                             | 4036                                             |               |
| Tmin,Tmax                                                     | 0.981,0.985                                      | 0.574,1.000                                      |               |
| Tmin'                                                         | 0.981                                            |                                                  |               |
| Correction method= # Reported T Limits: Tmin=0.574 Tmax=1.000 |                                                  |                                                  |               |
| AbsCorr = MULTI-SCAN                                          |                                                  |                                                  |               |
| Data completeness=                                            | 0.988                                            | Theta(max)= 26.367                               |               |
| R(reflections)=                                               | 0.0465( 3060)                                    | wR2(reflections)= 0.1168( 4036)                  |               |
| S =                                                           | 1.036                                            | Npar= 265                                        |               |
| CCDC: <b>2286479</b>                                          |                                                  |                                                  |               |
